# Supplementary material
Source: PubMed Central journal article supplement (PMC9308652)
Supplement: NIHMS1807402-supplement-319976_Uncut_Gel_Blots.pdf [file NIHMS1807402-supplement-319976_Uncut_Gel_Blots.pdf]

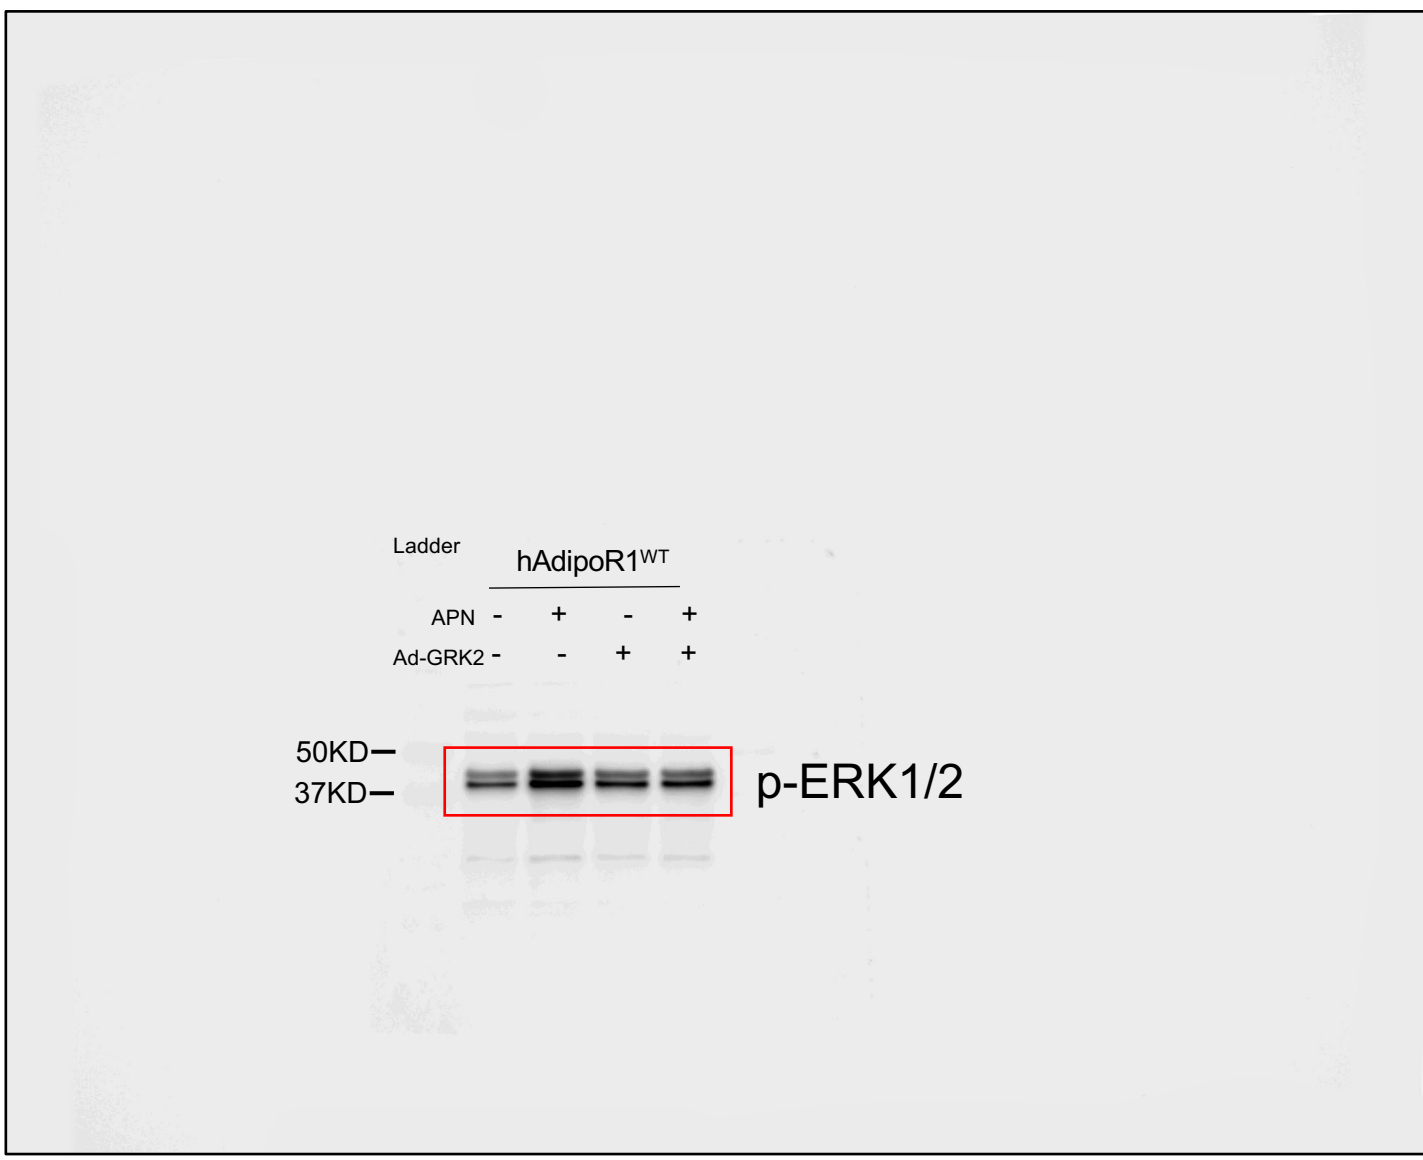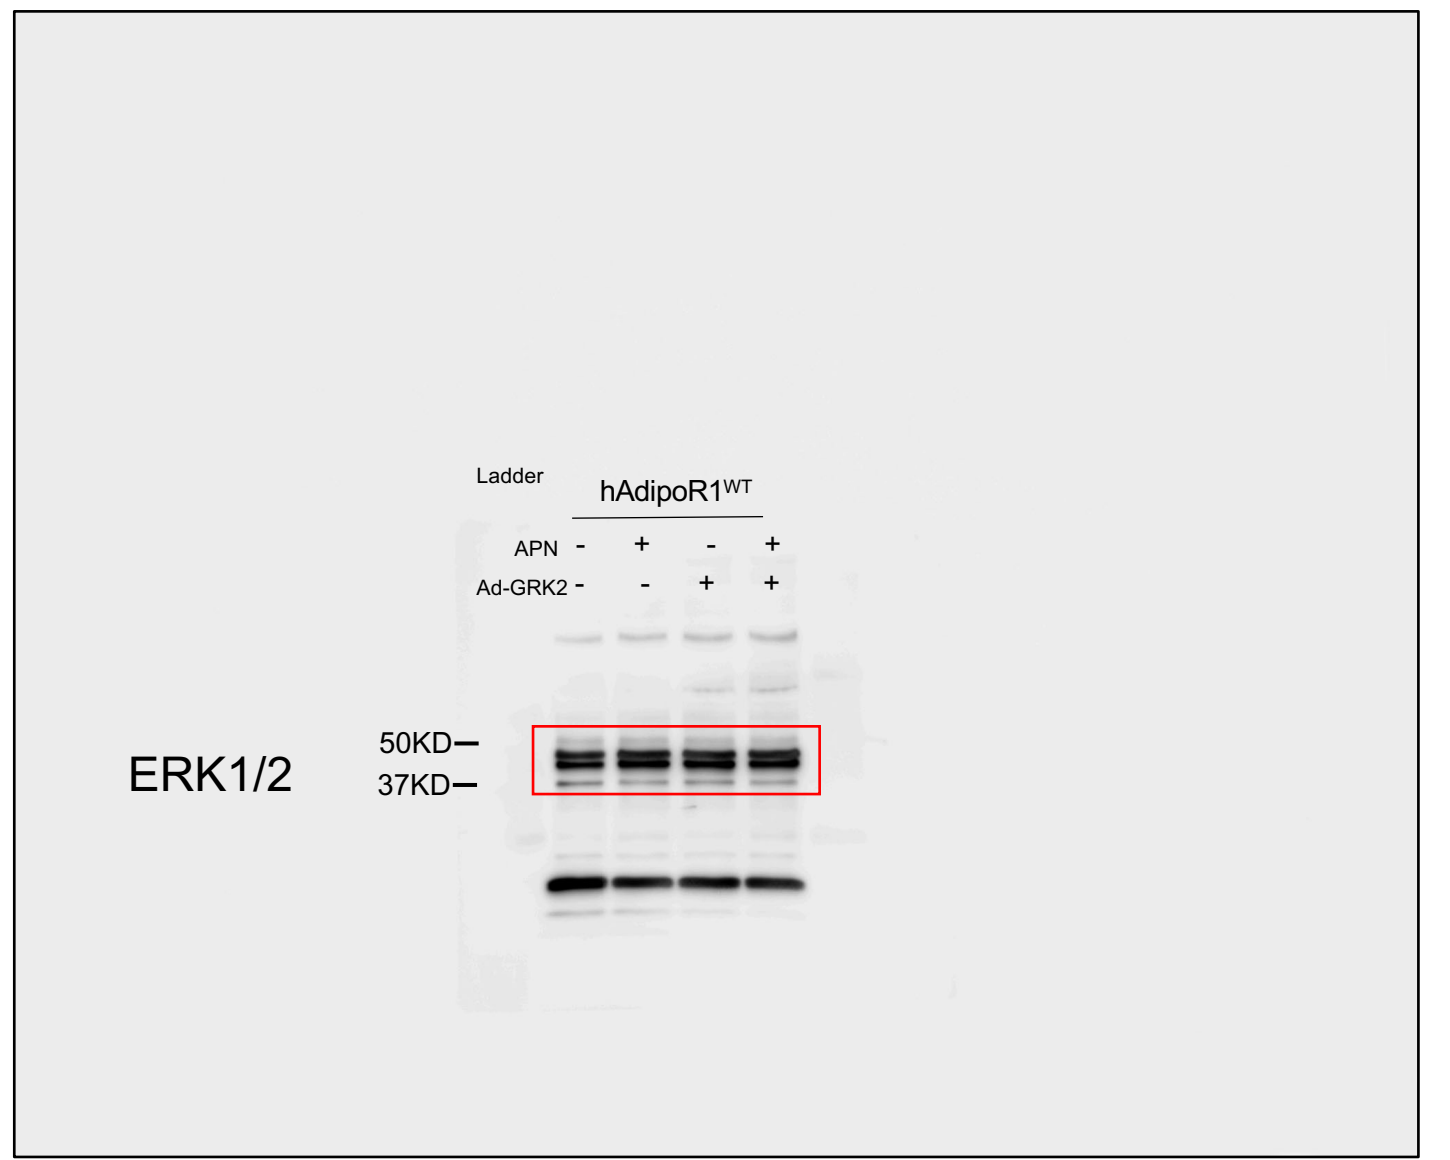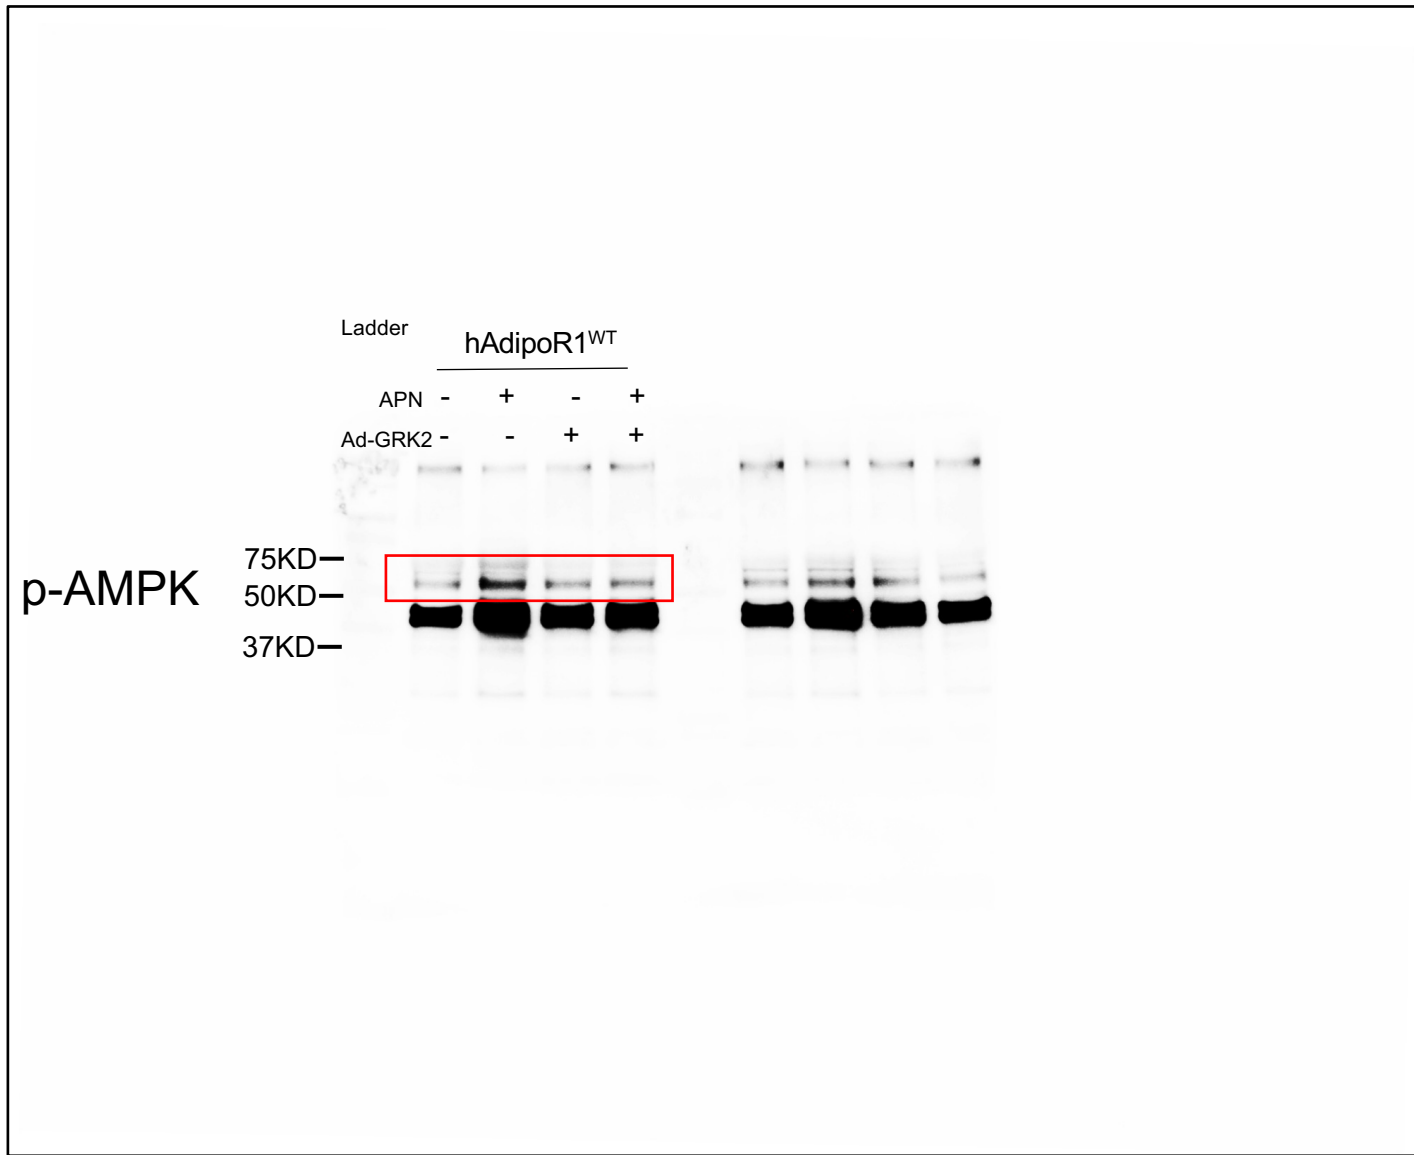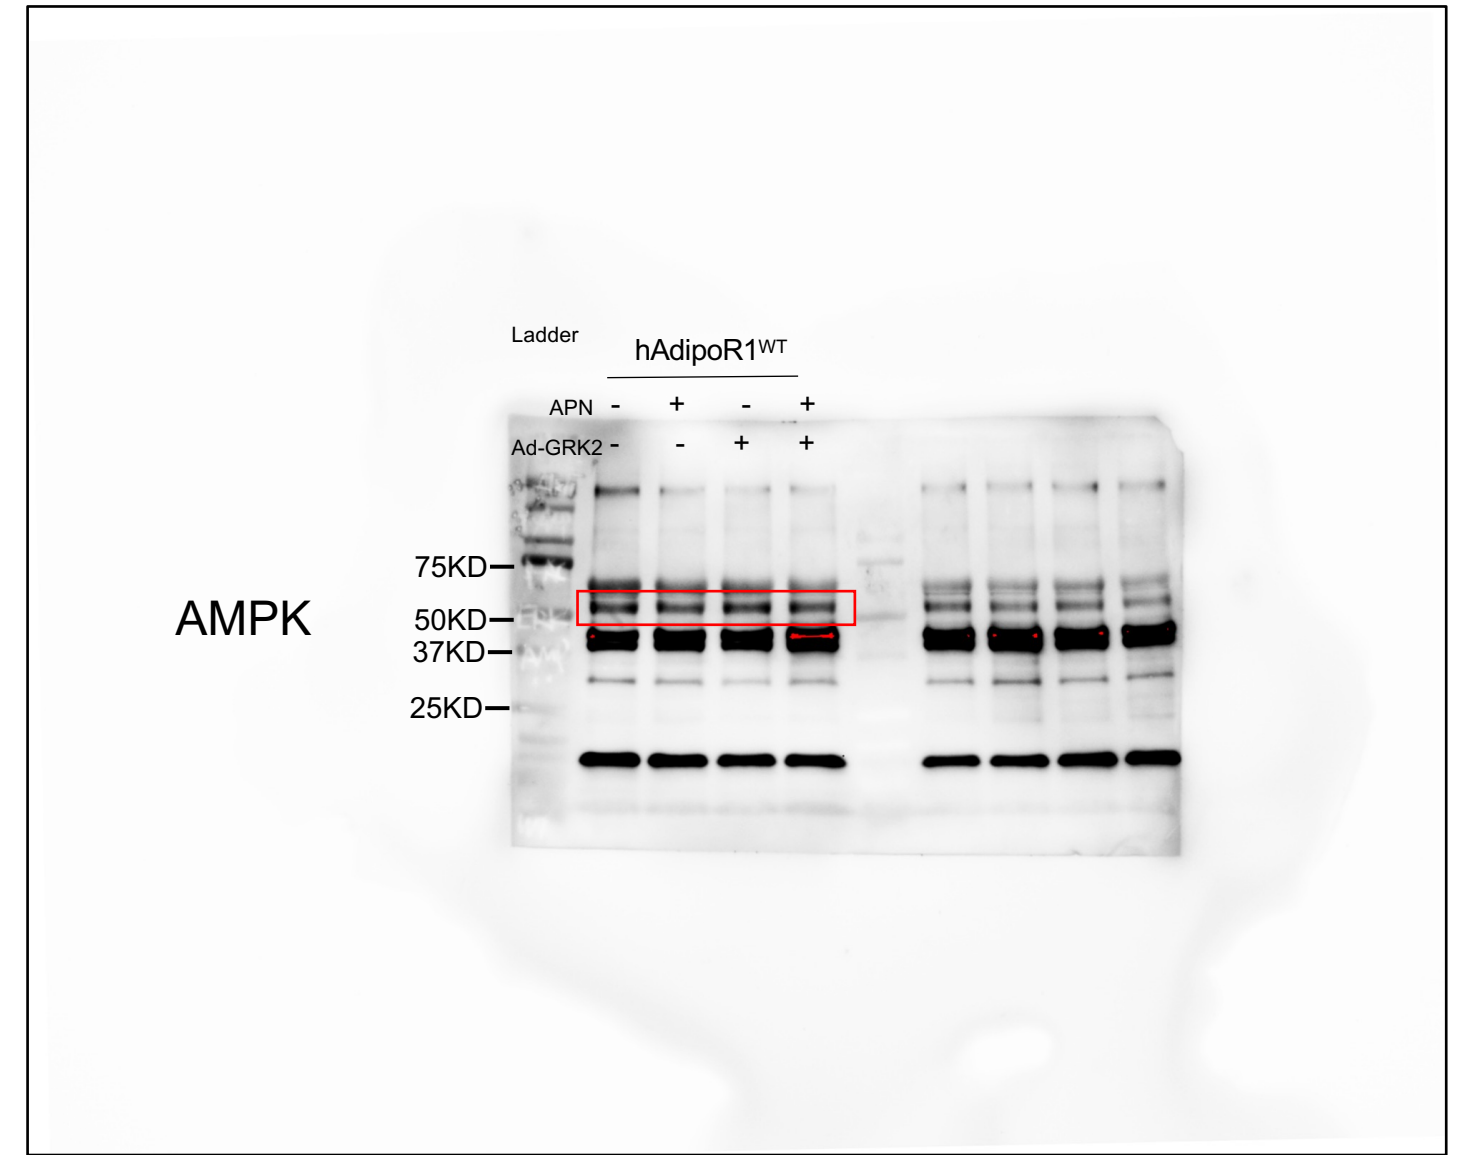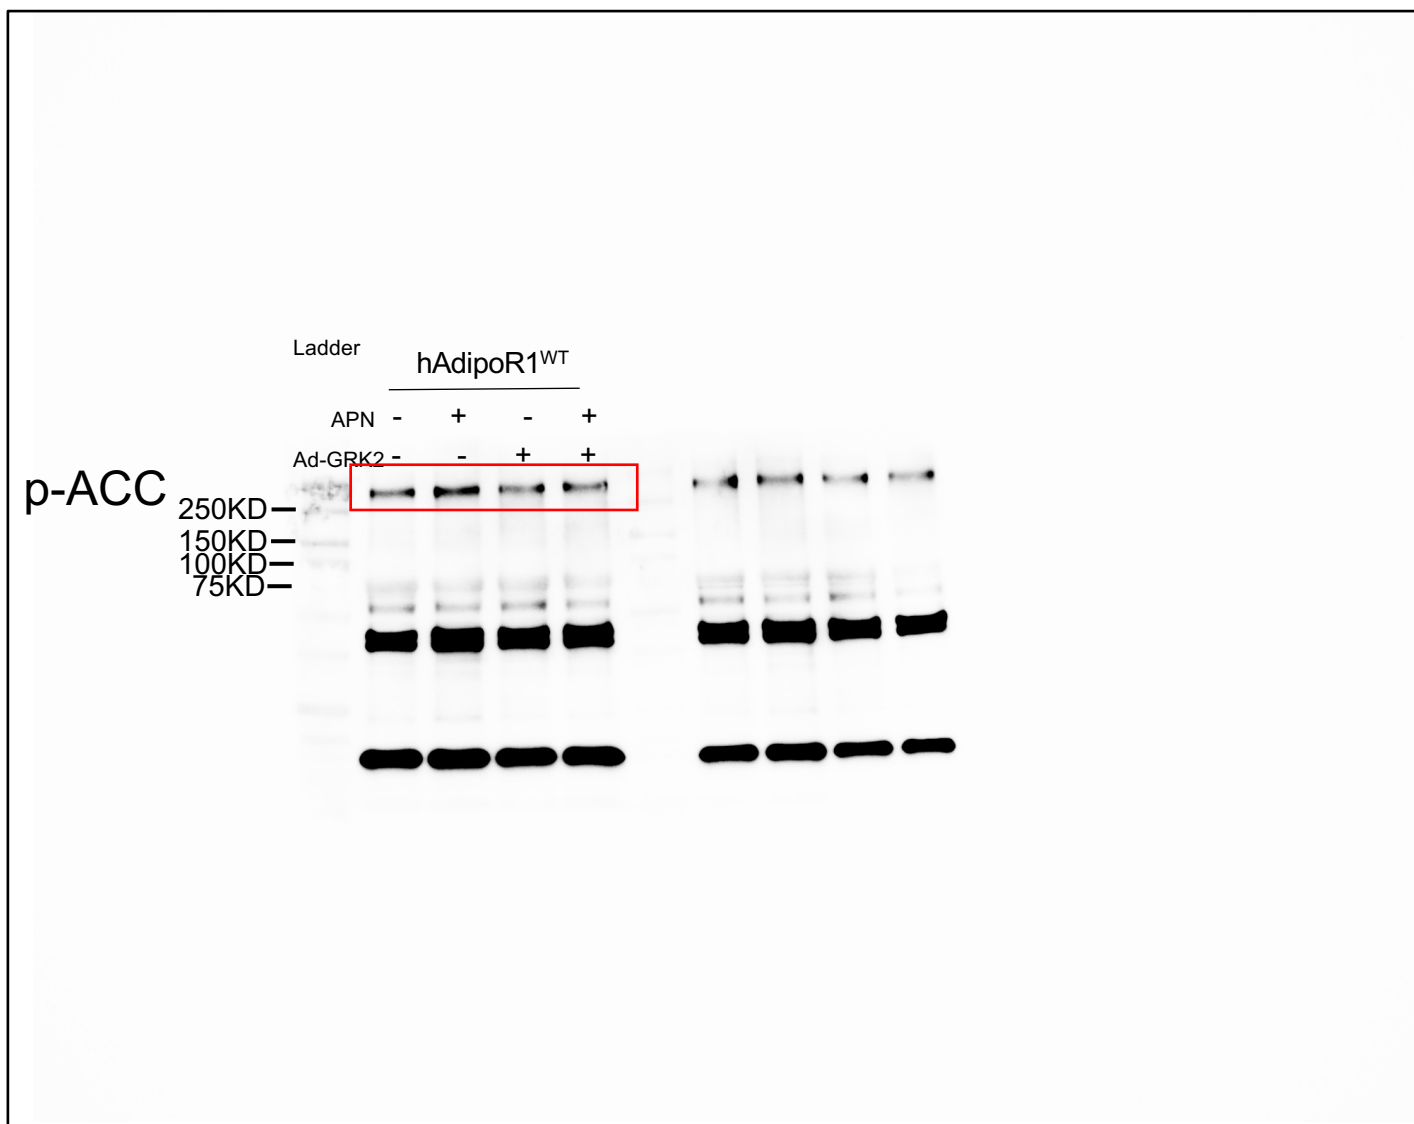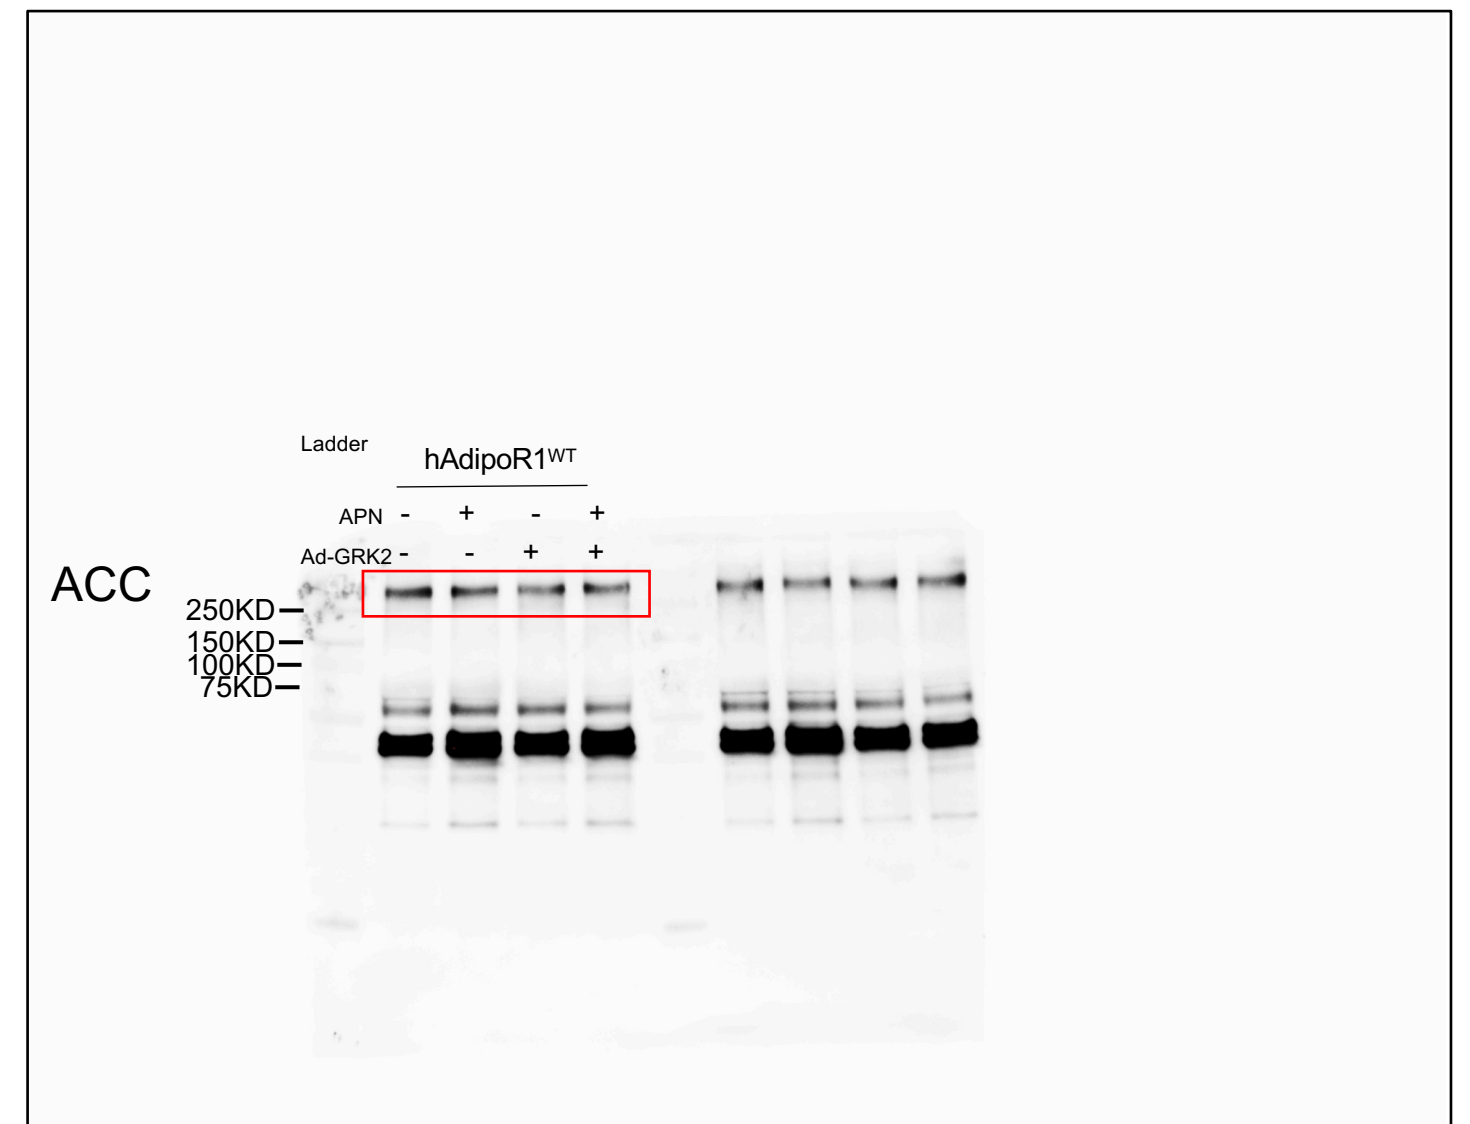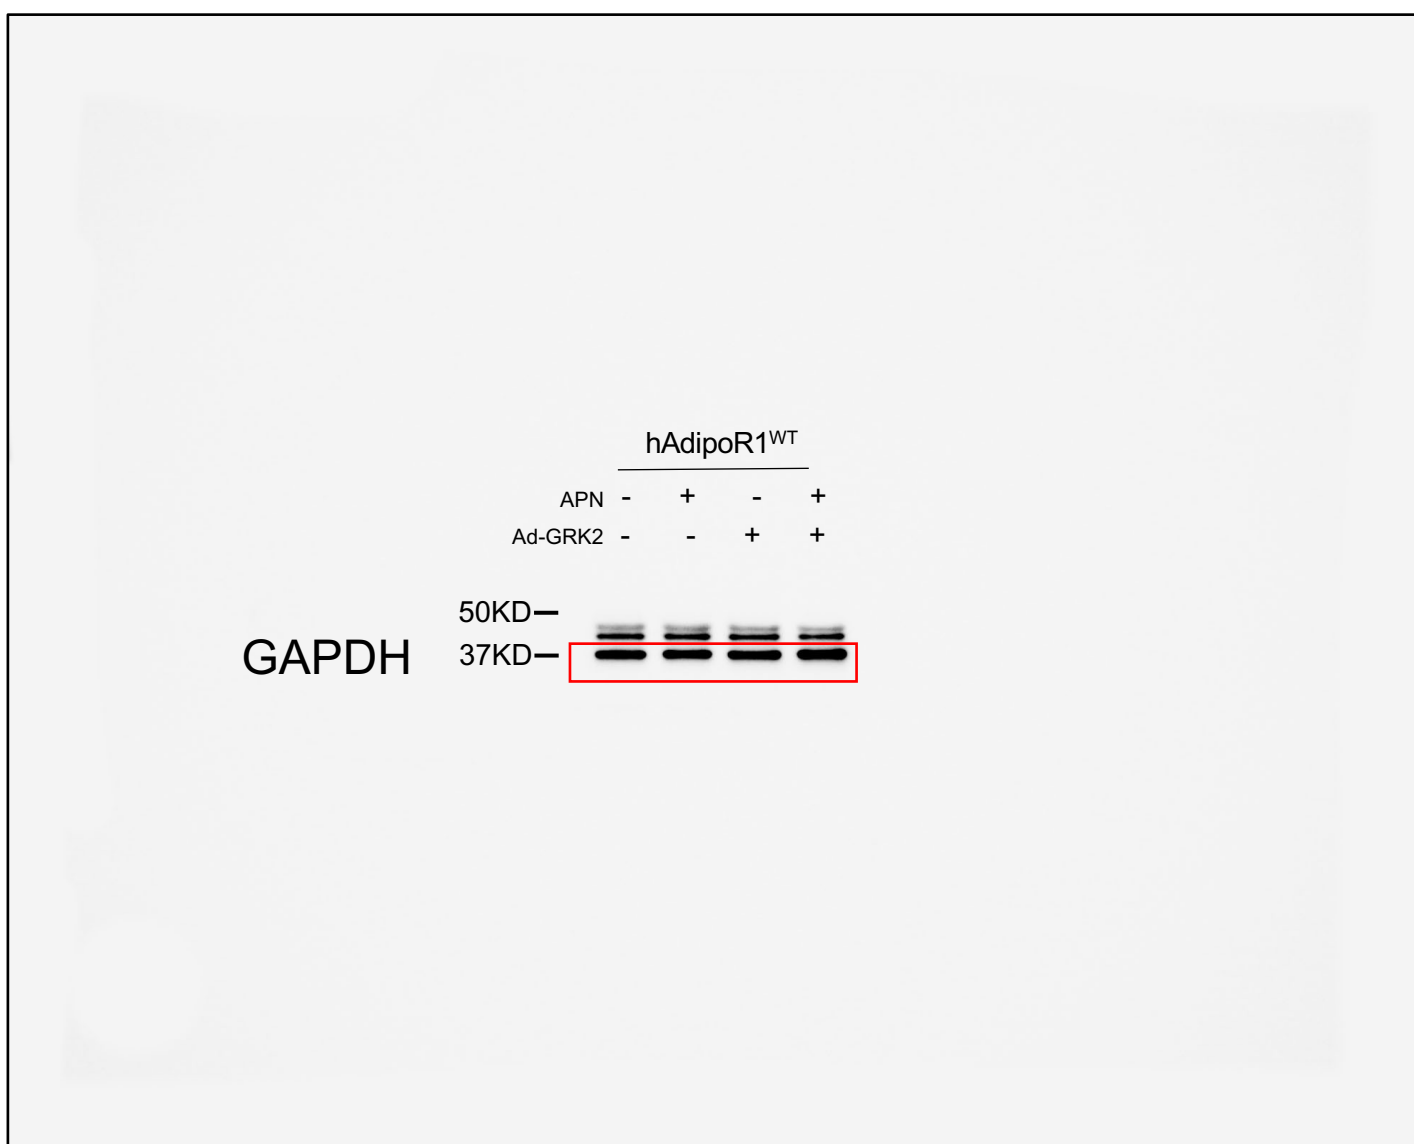

Figure 1A

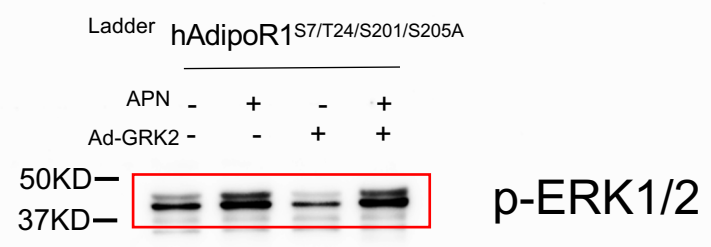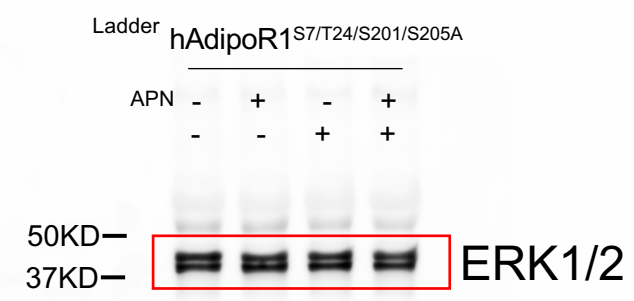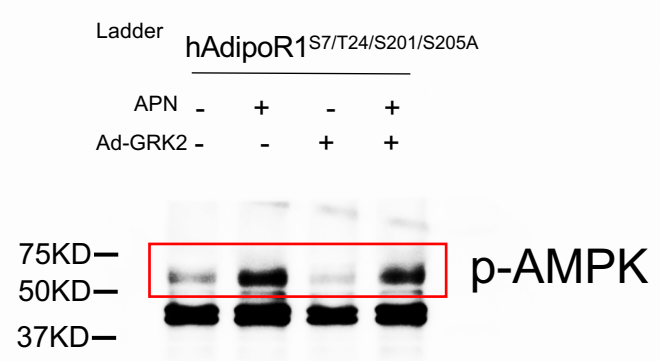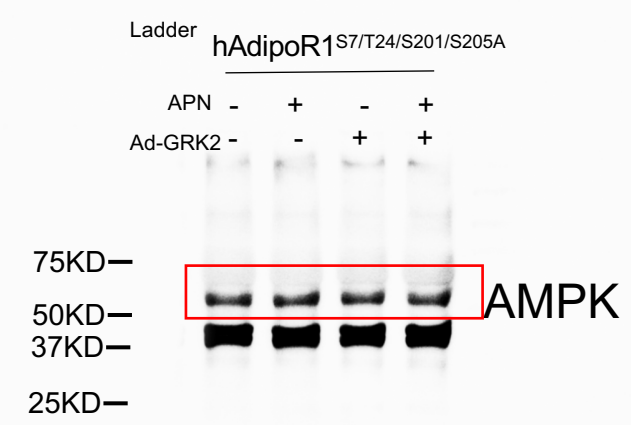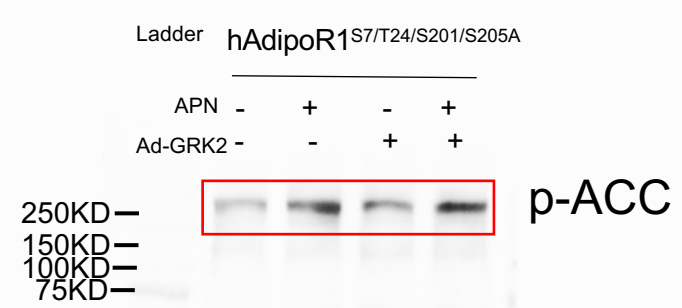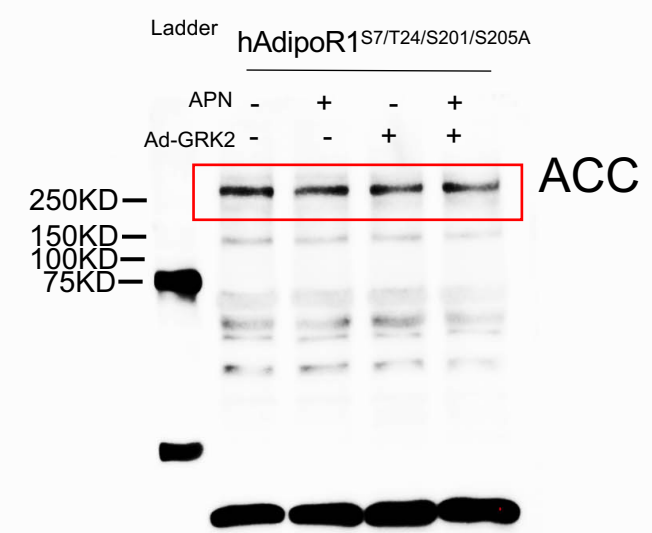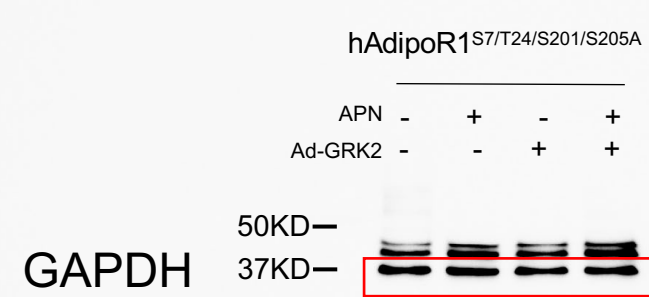

Figure 1C

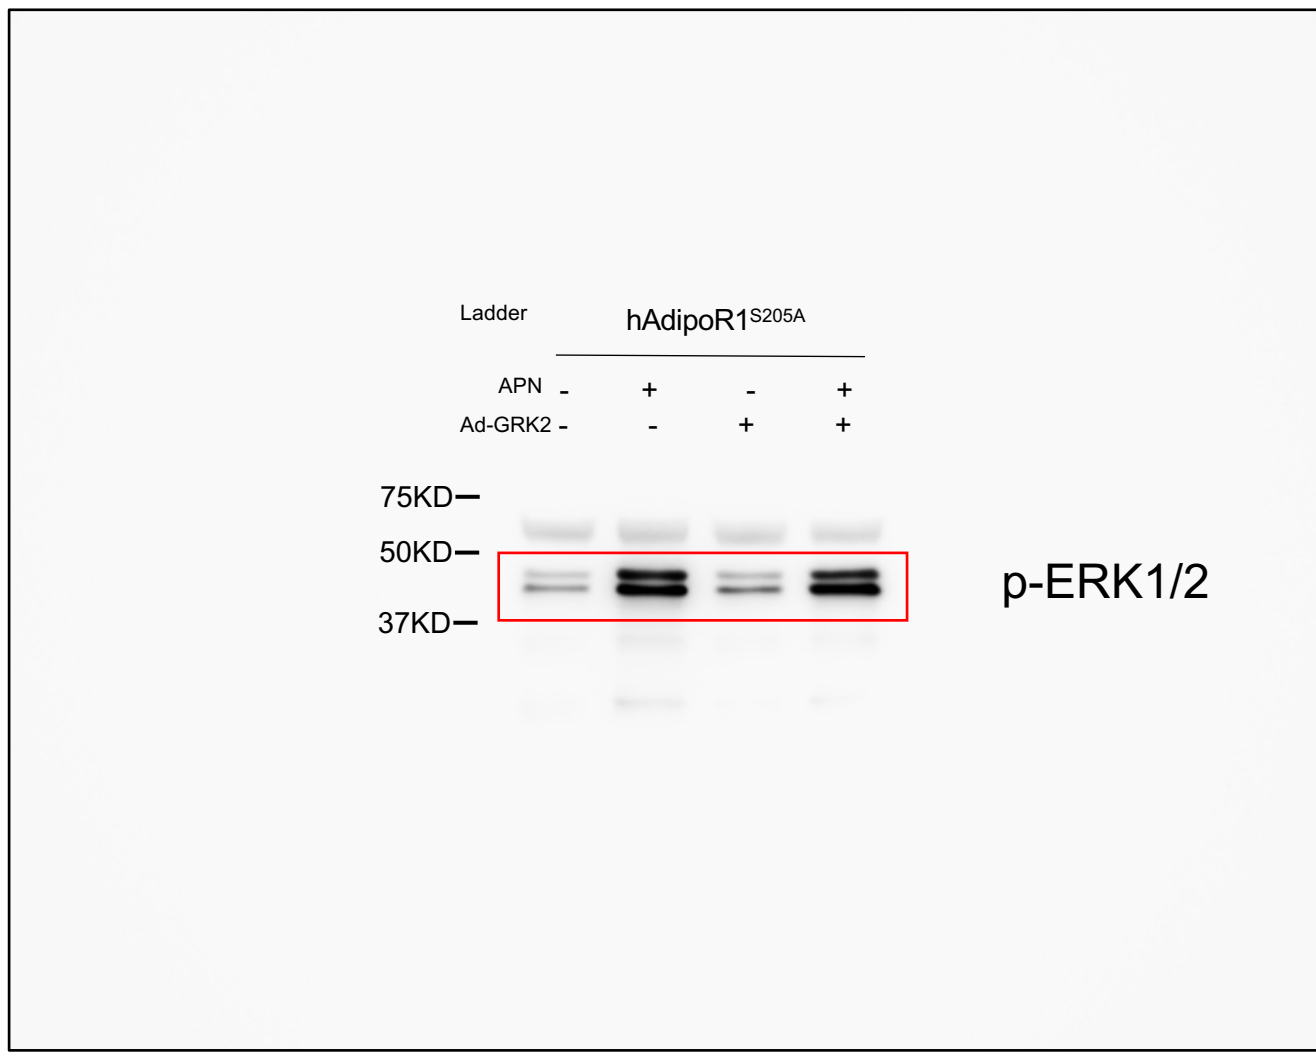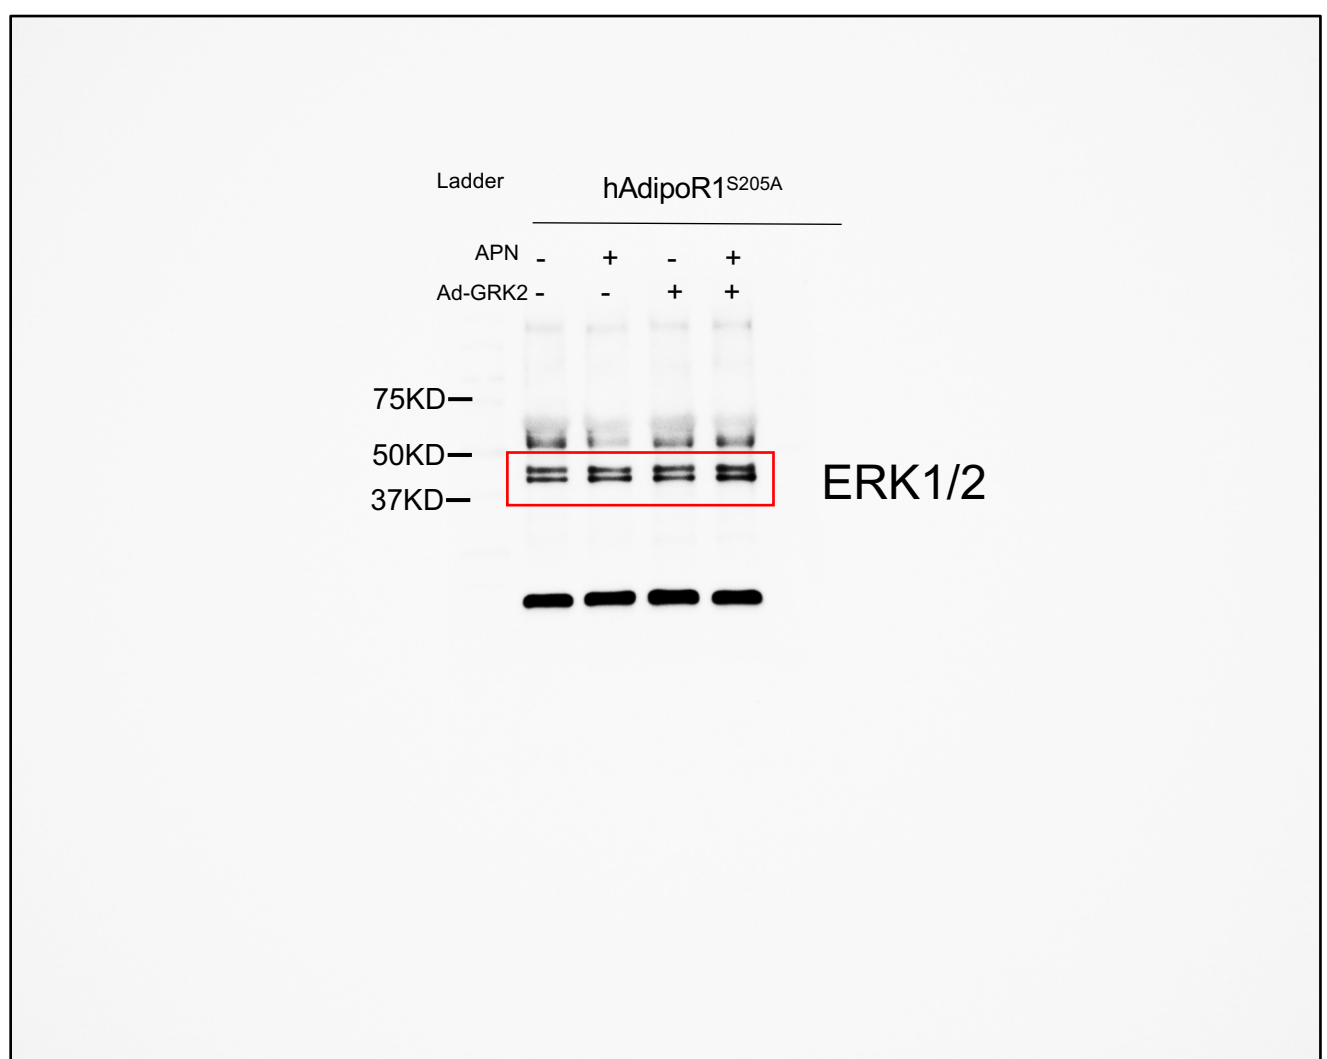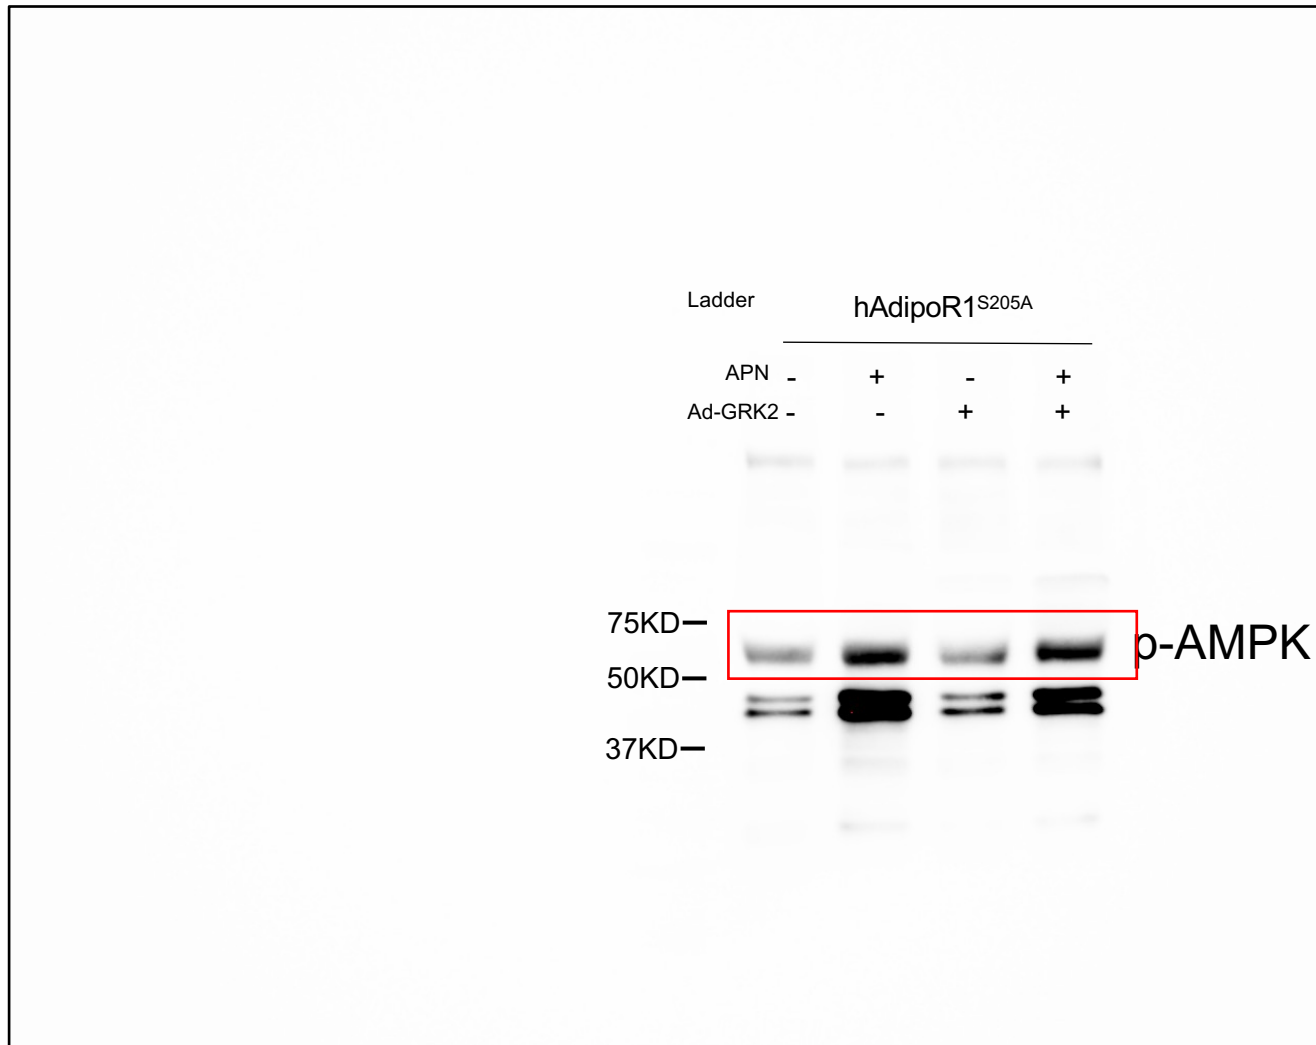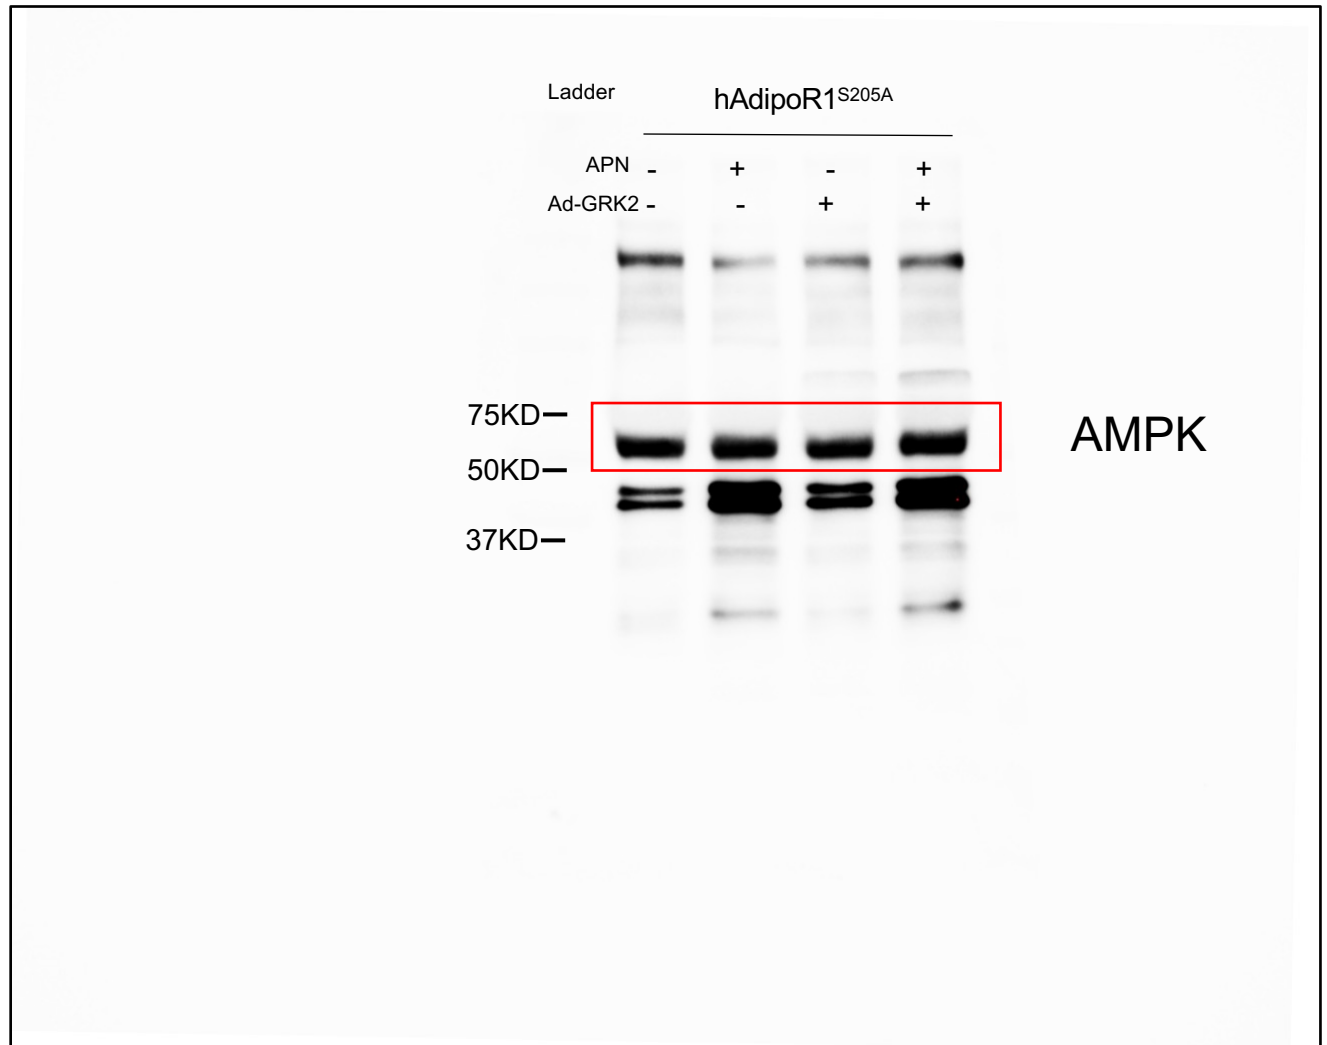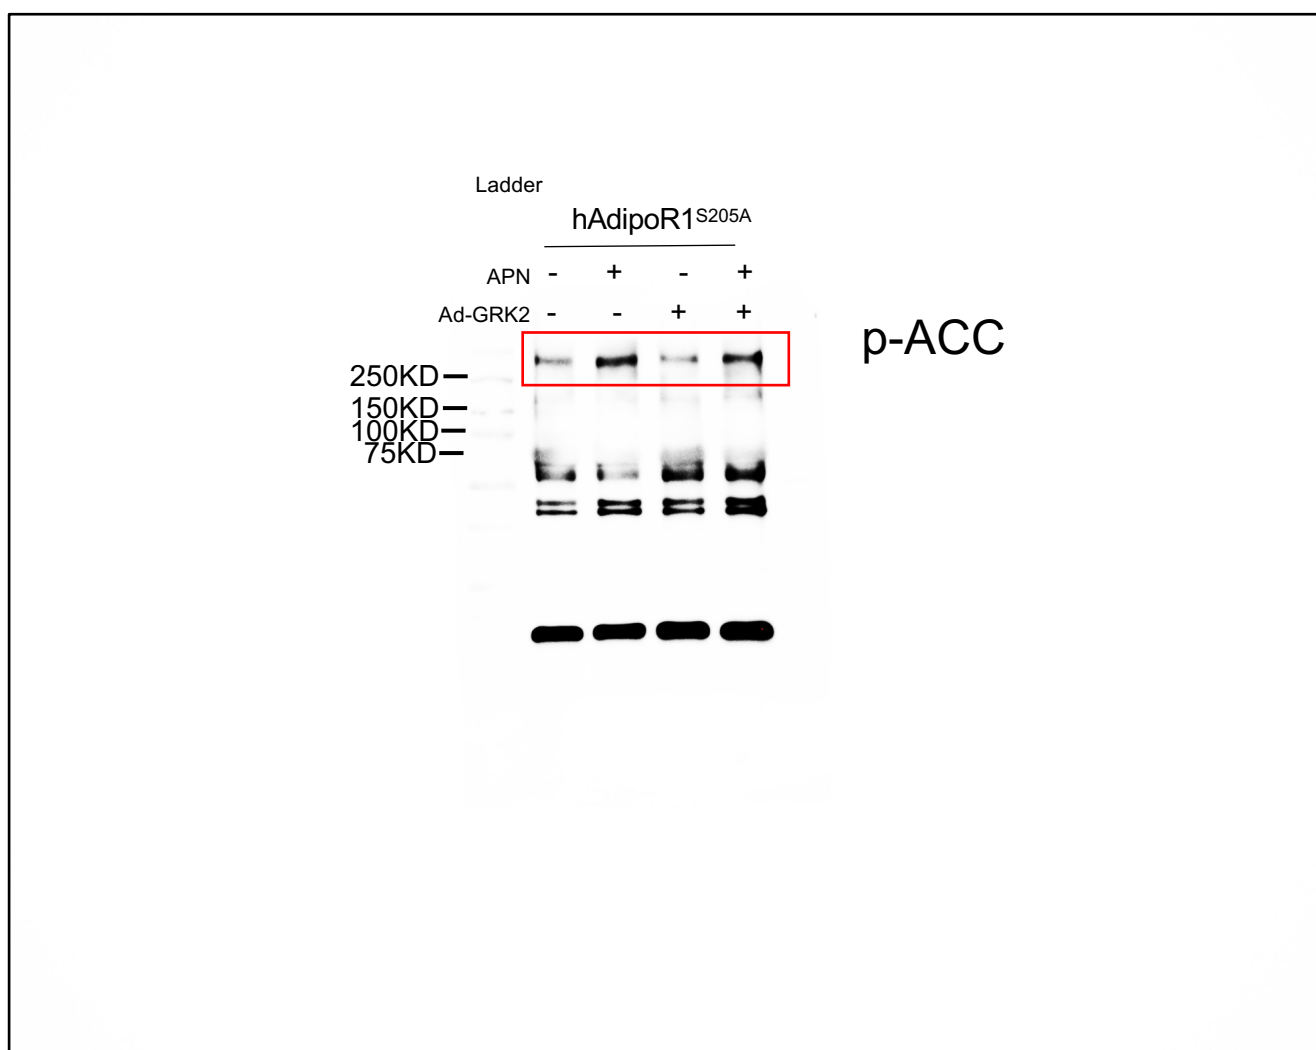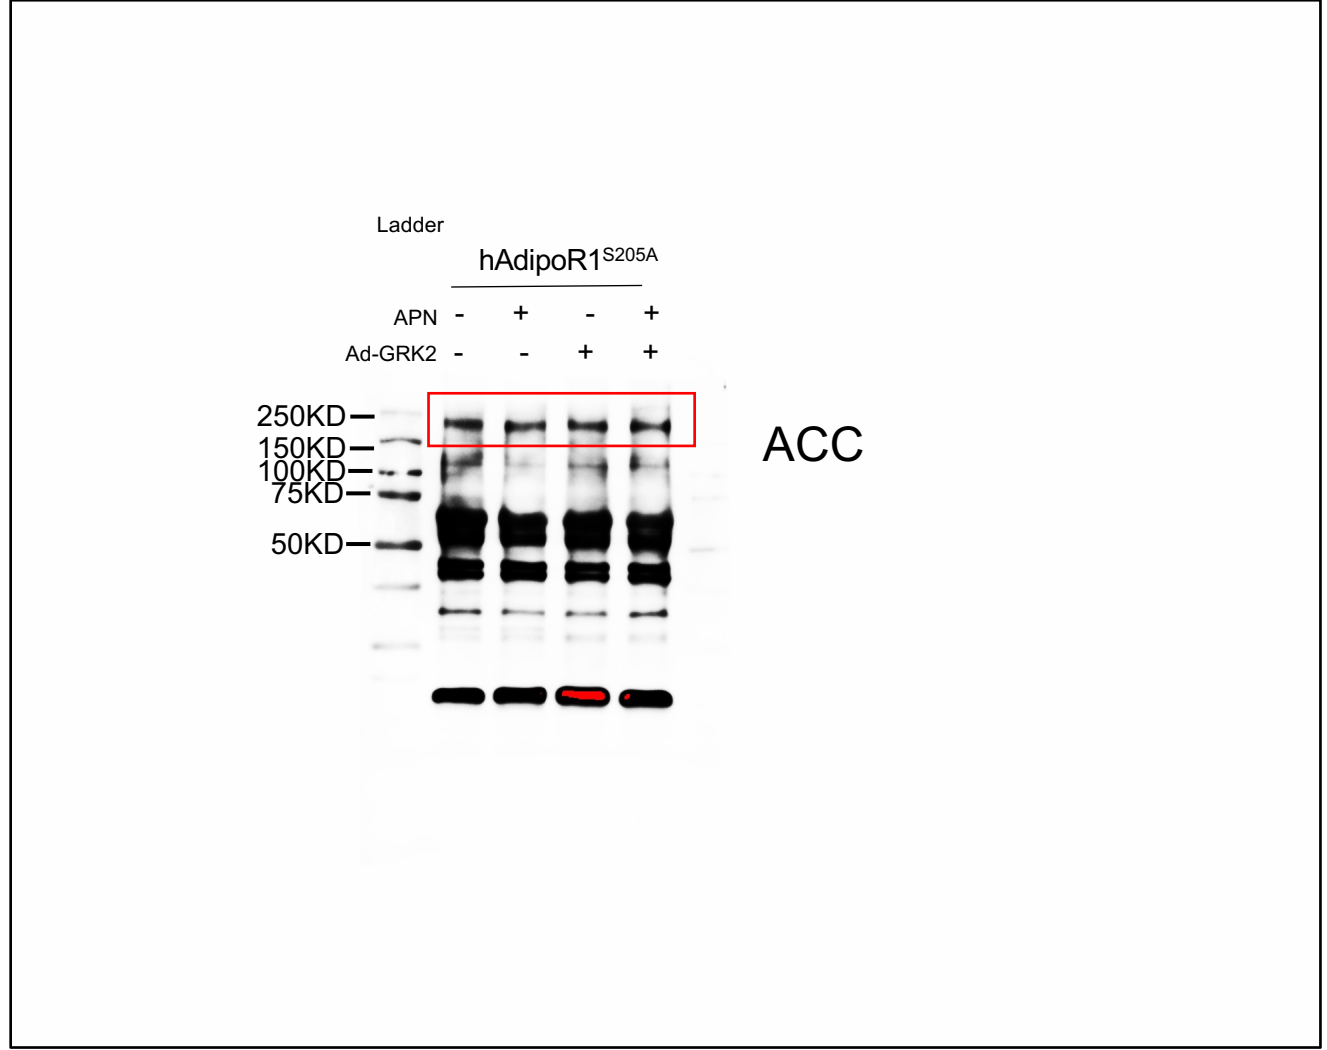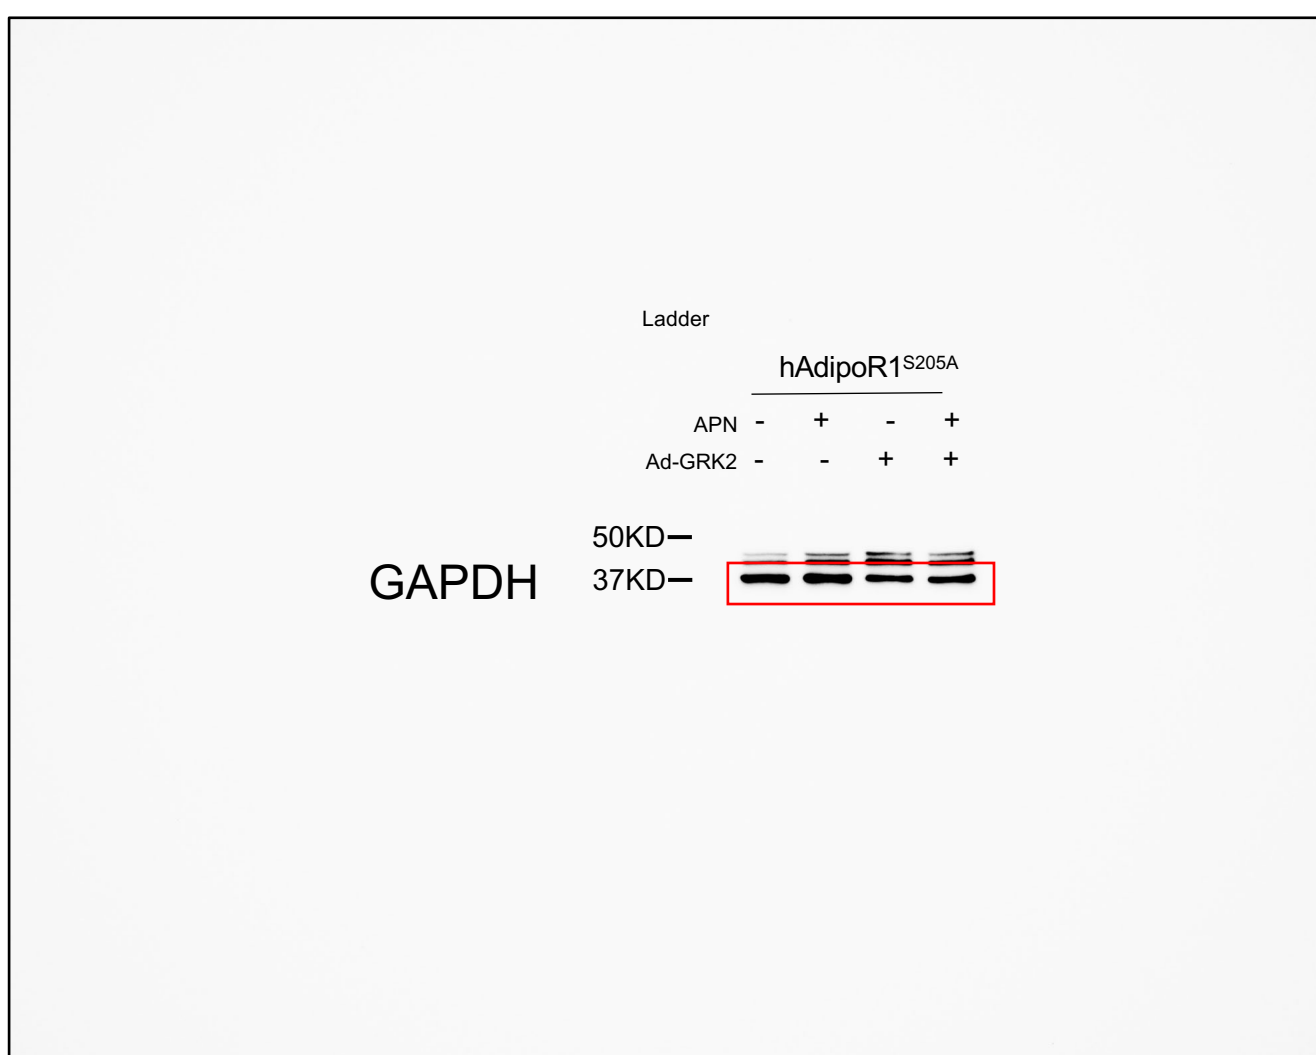

Figure 1E

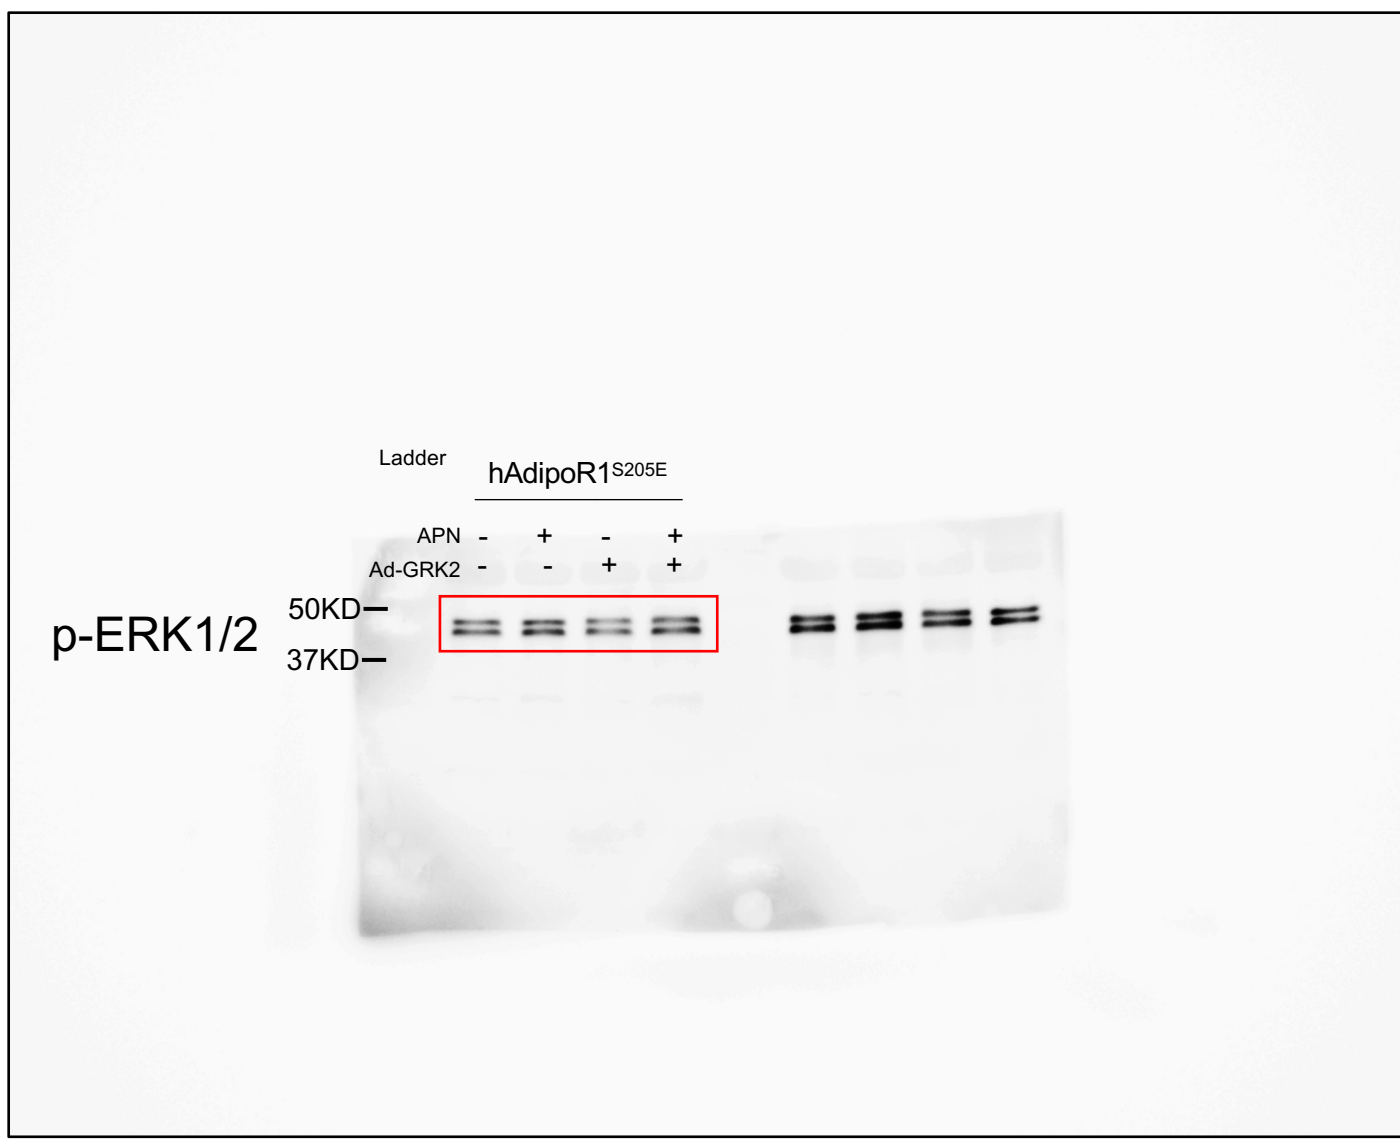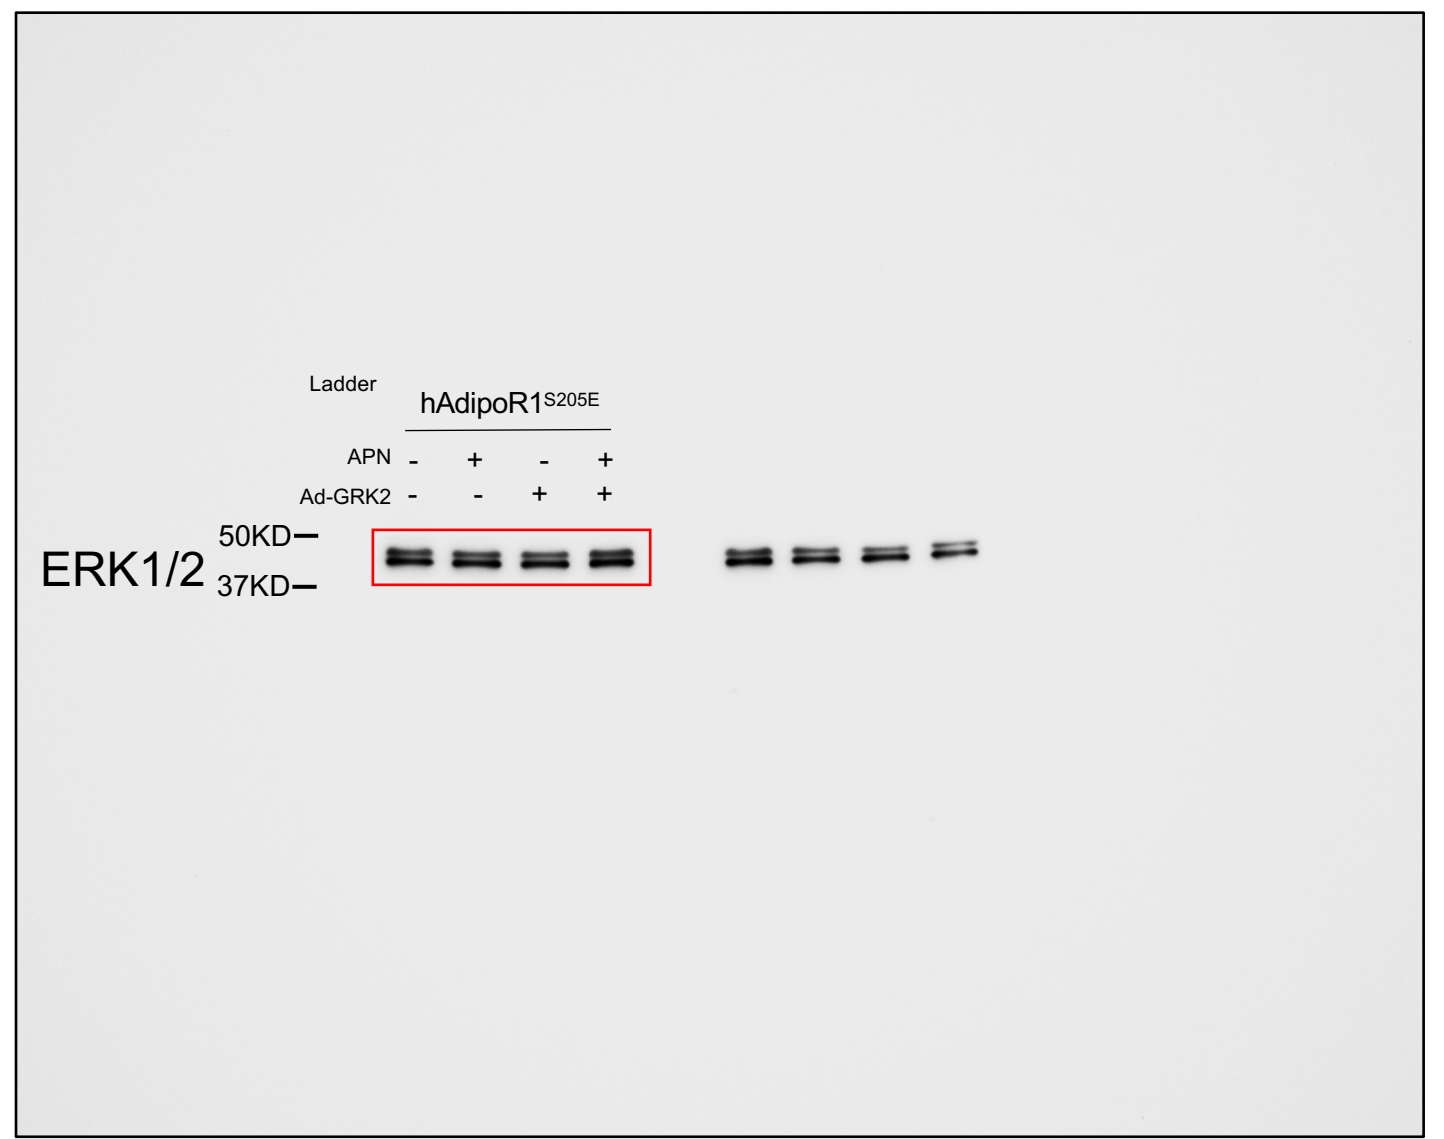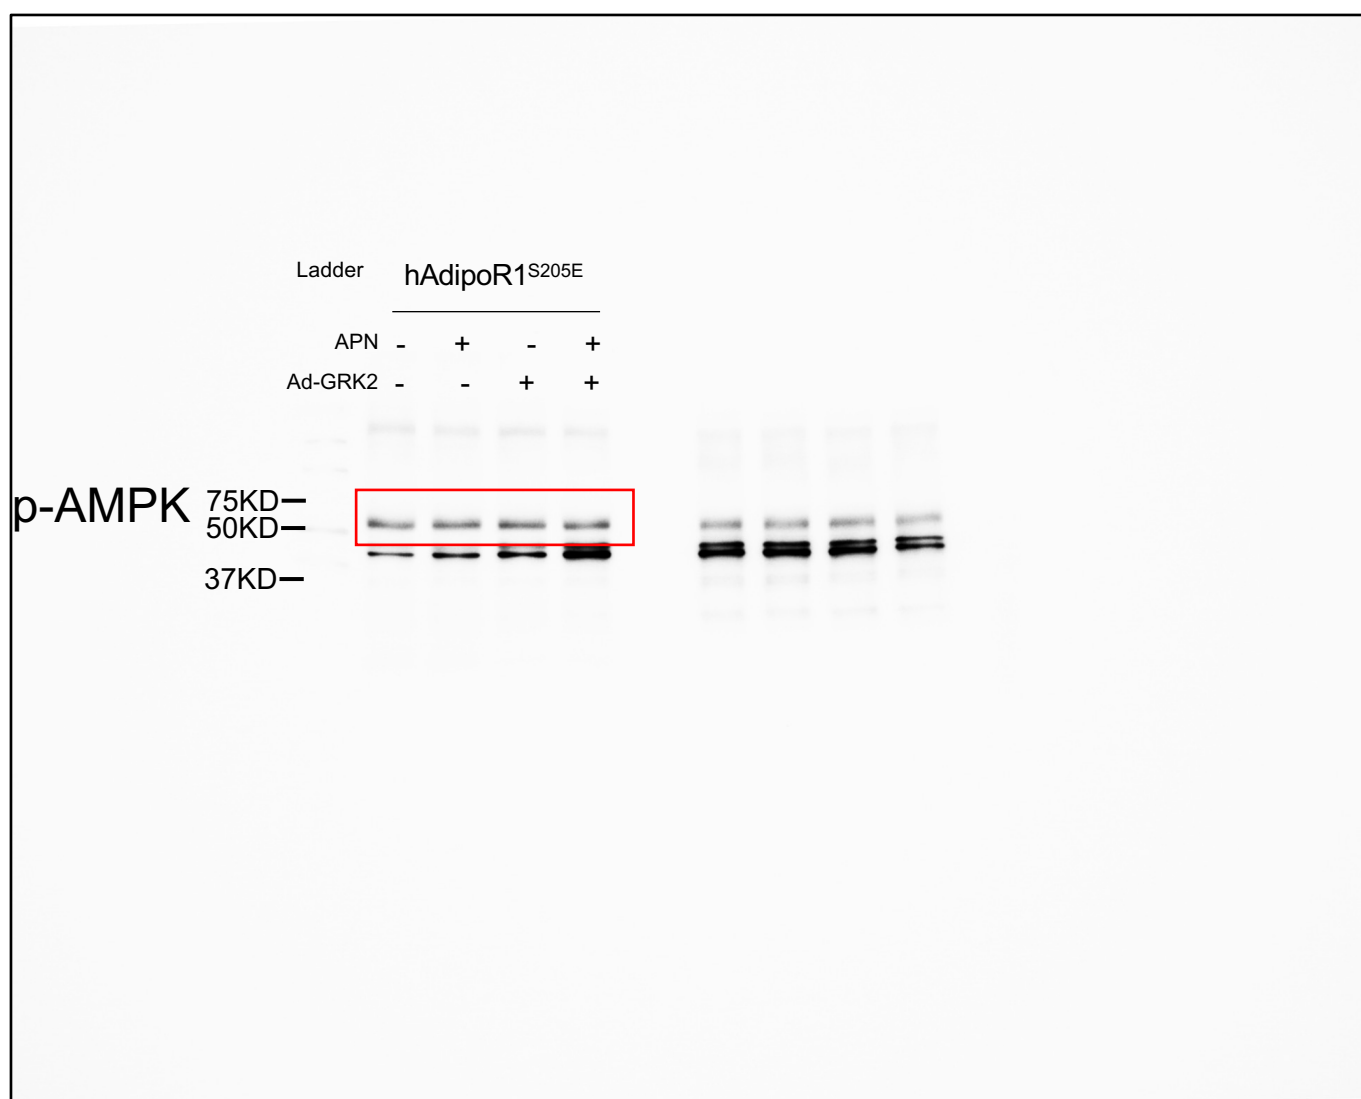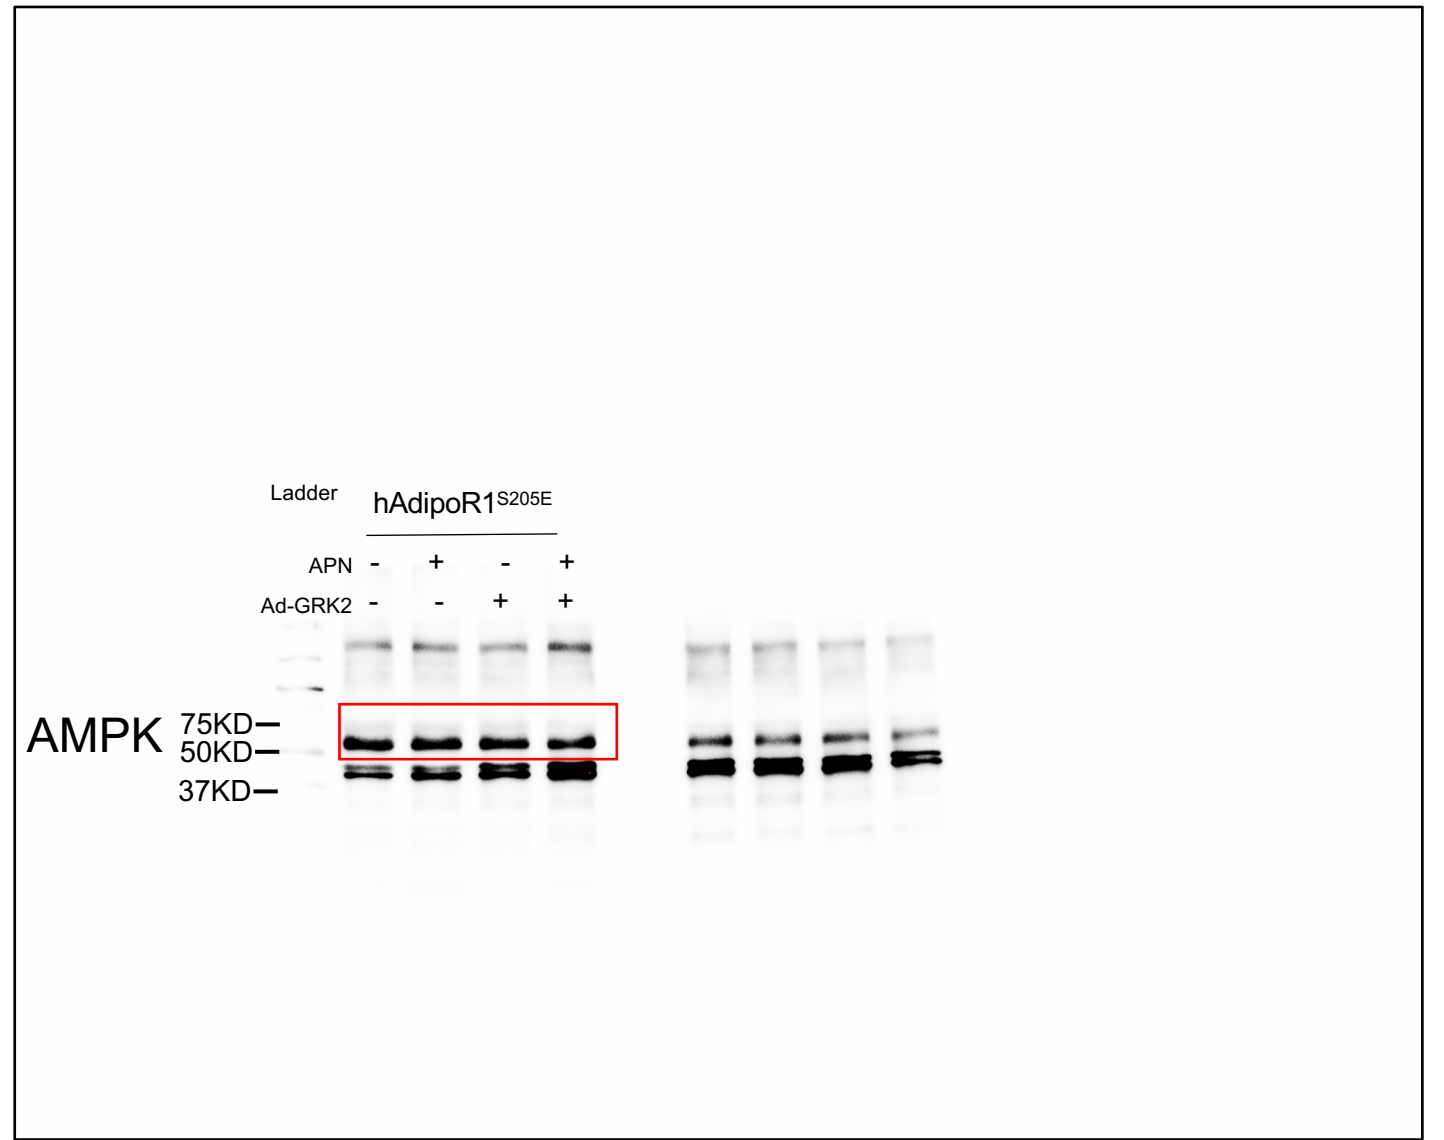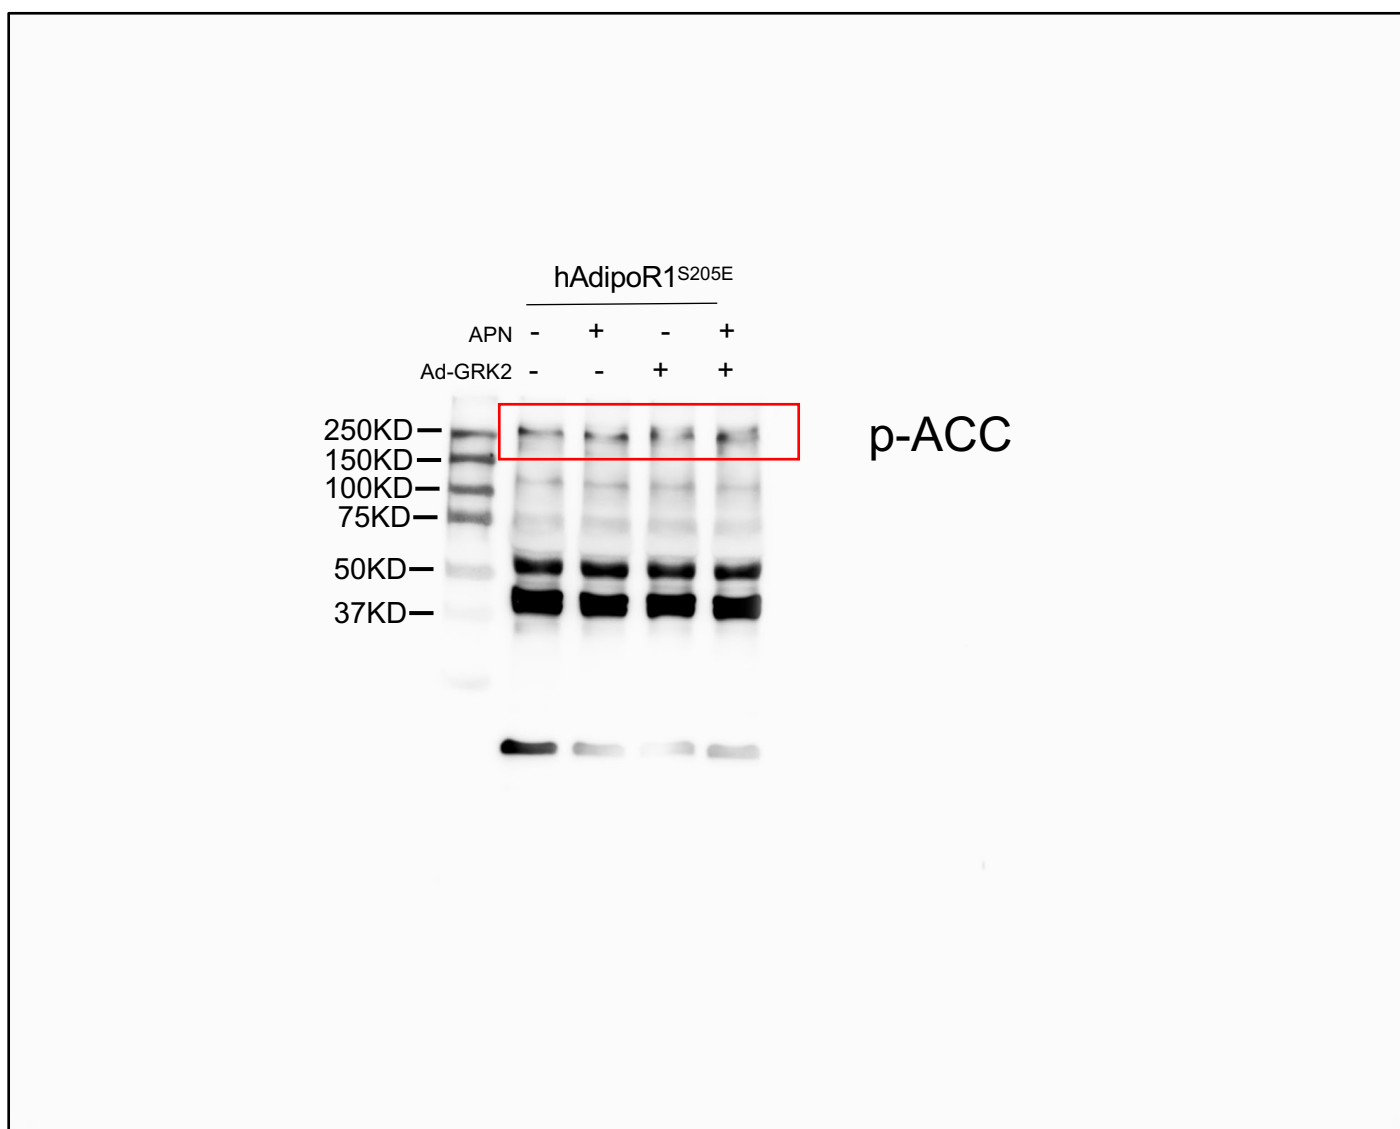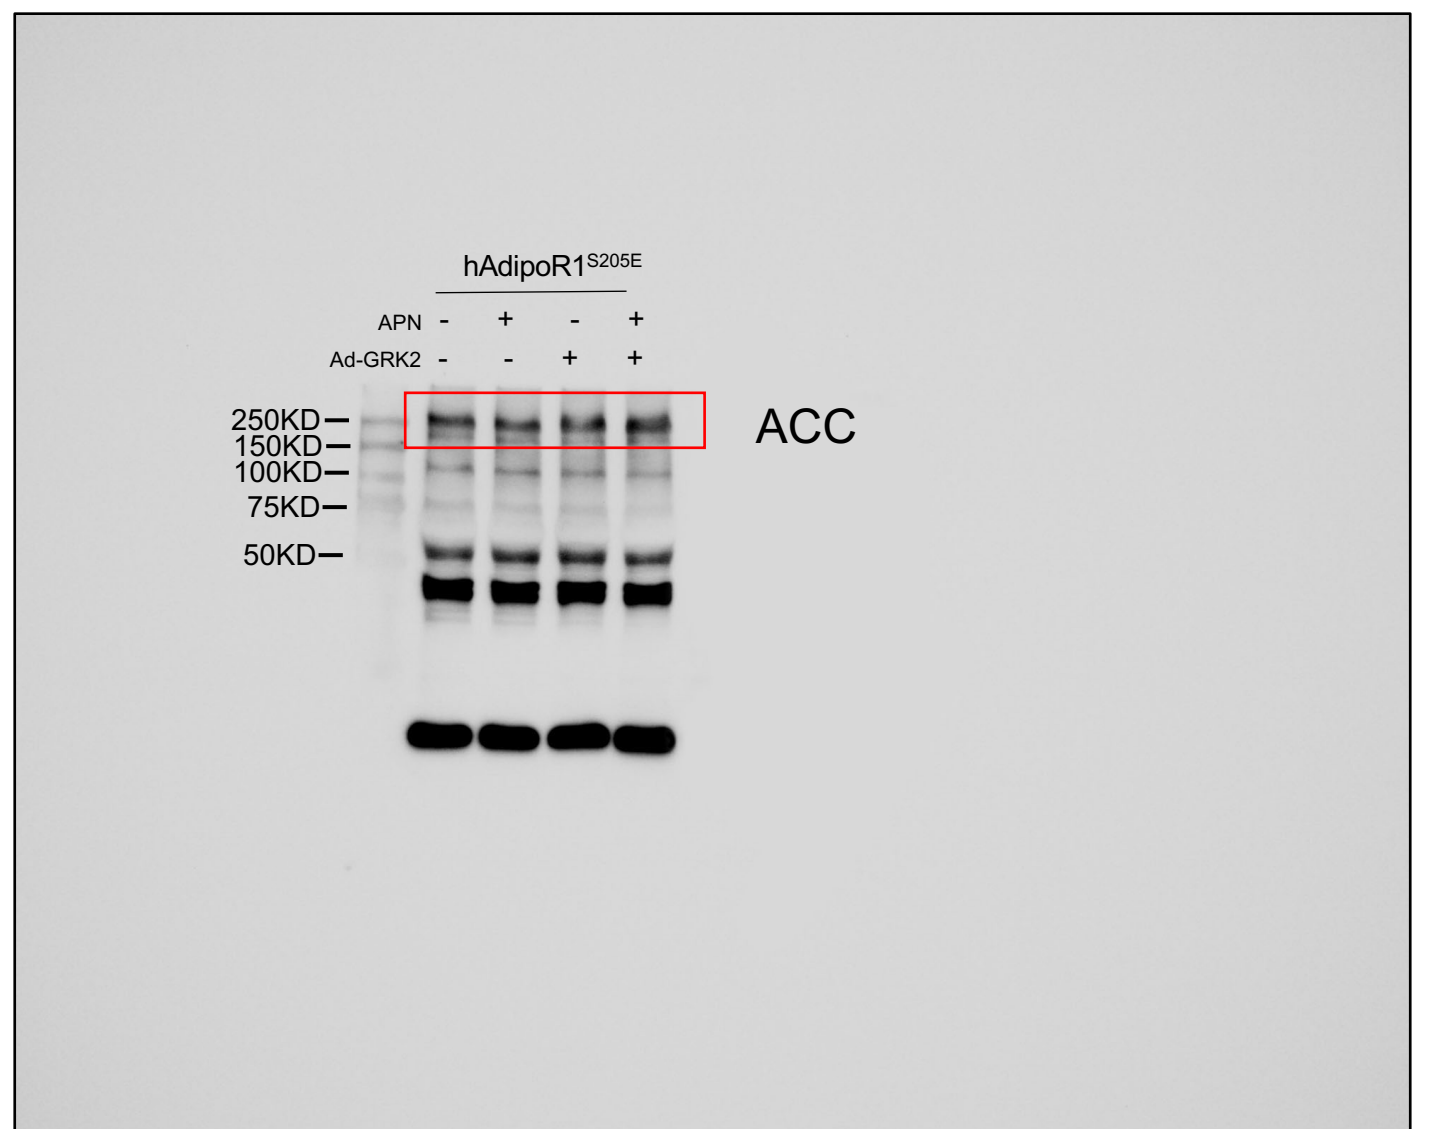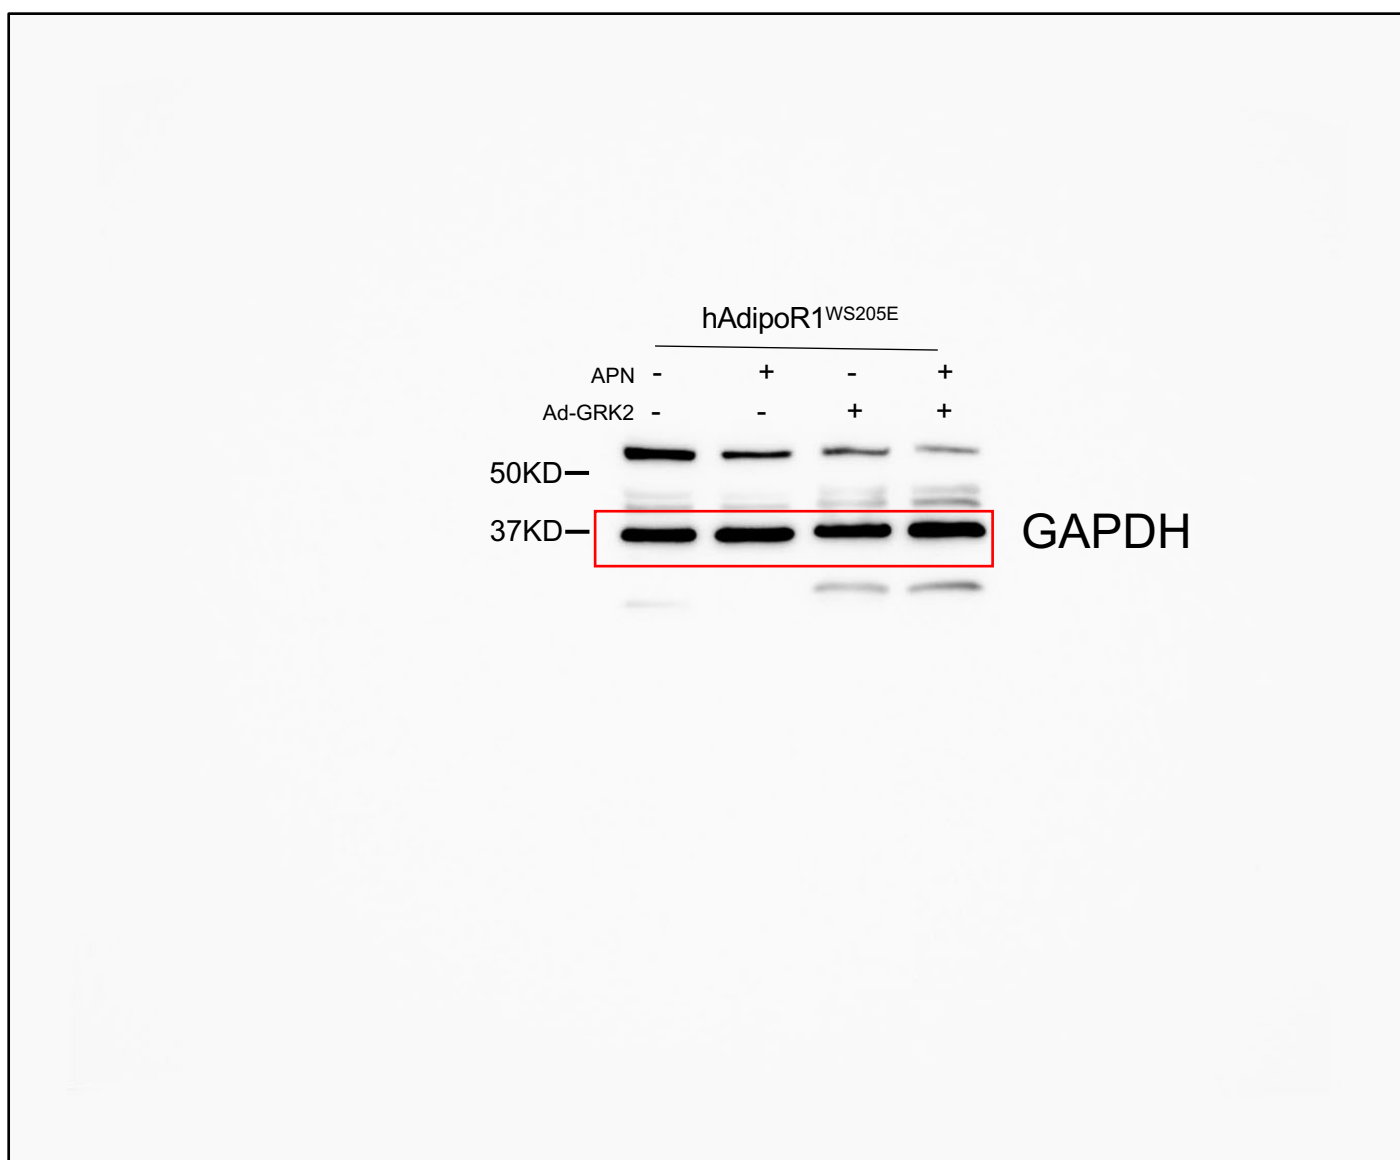

Figure 1G

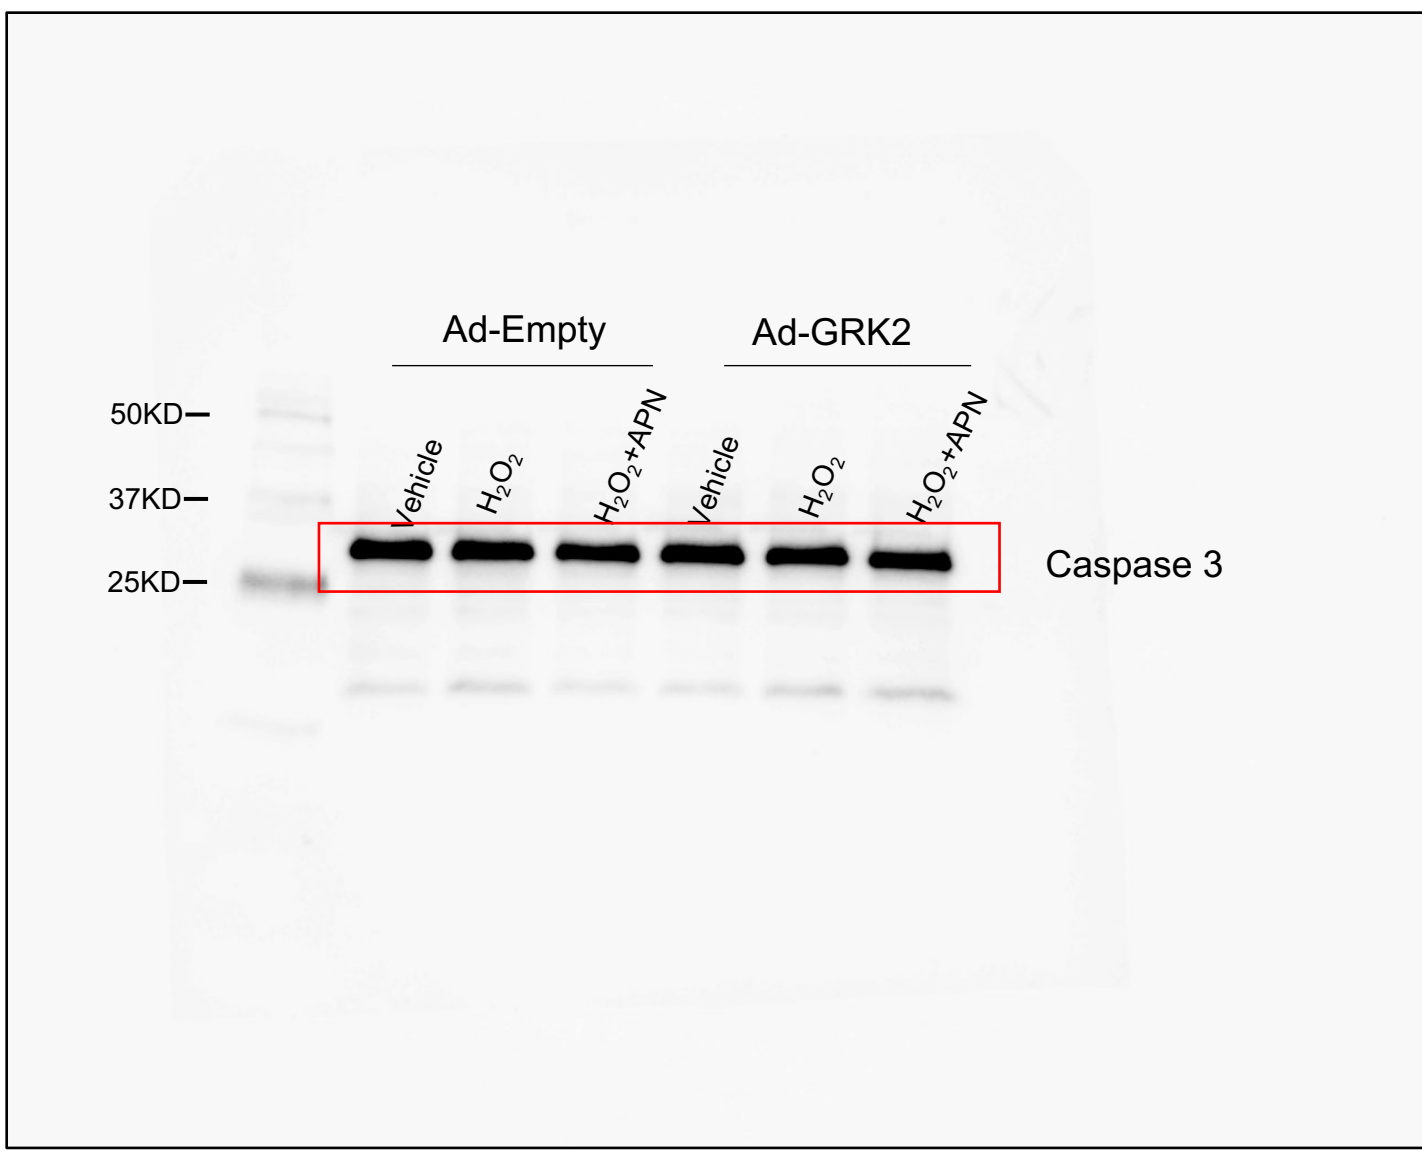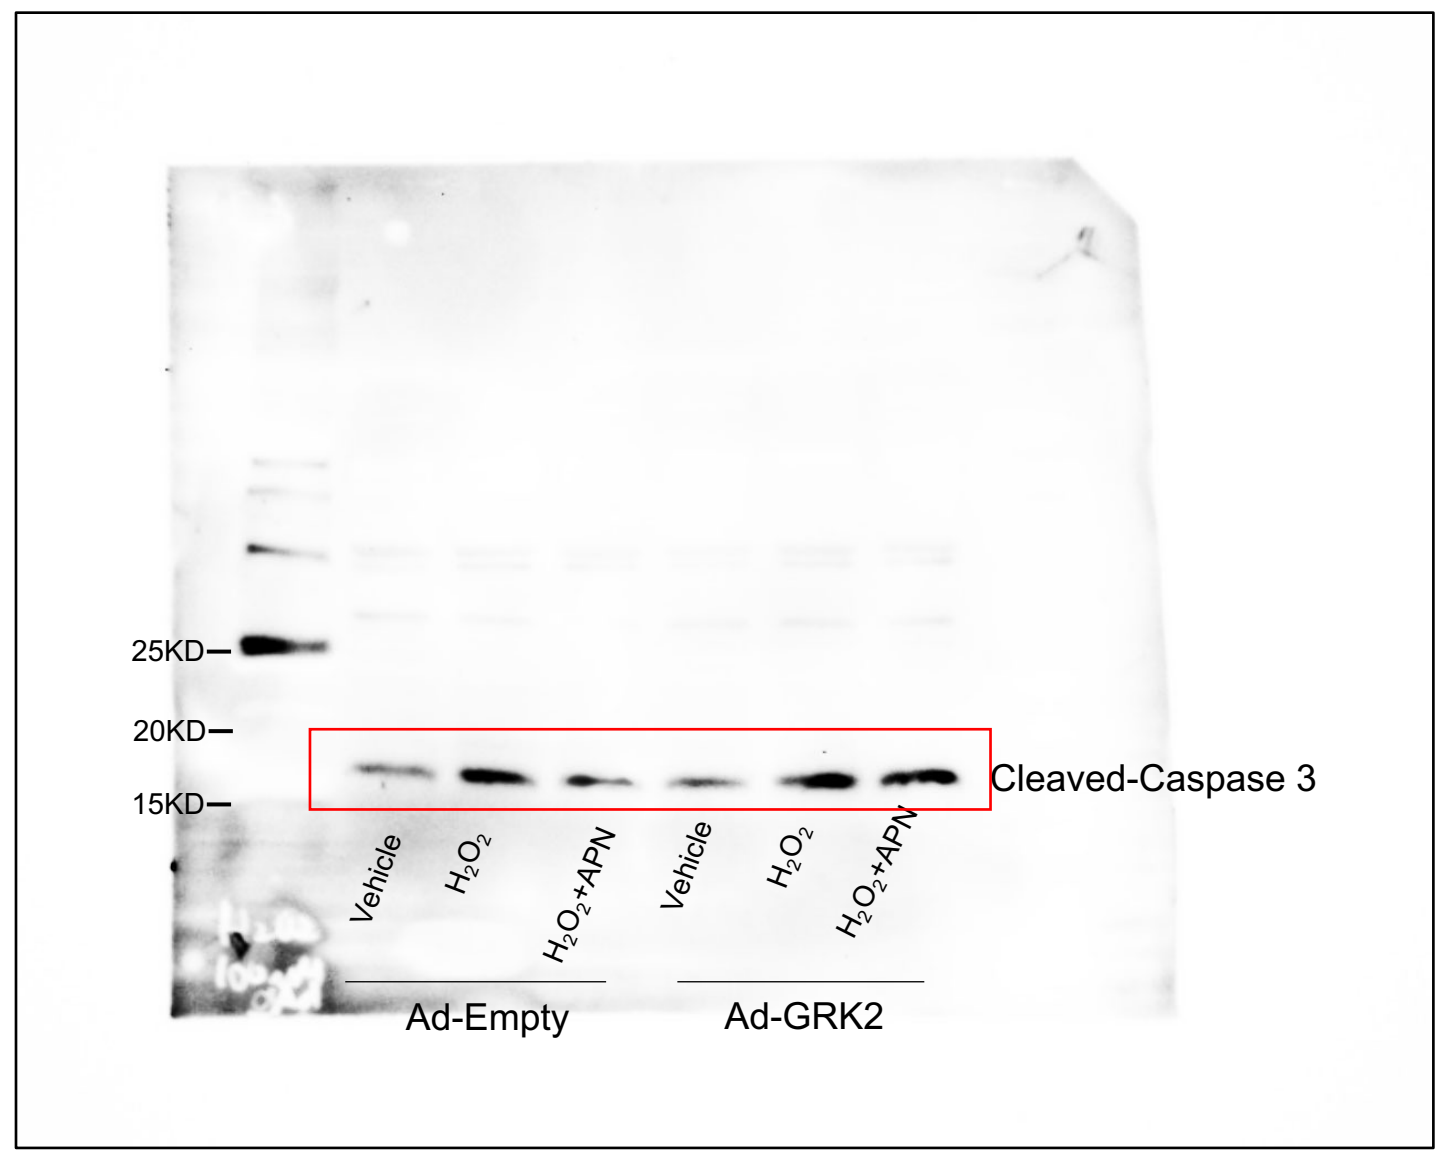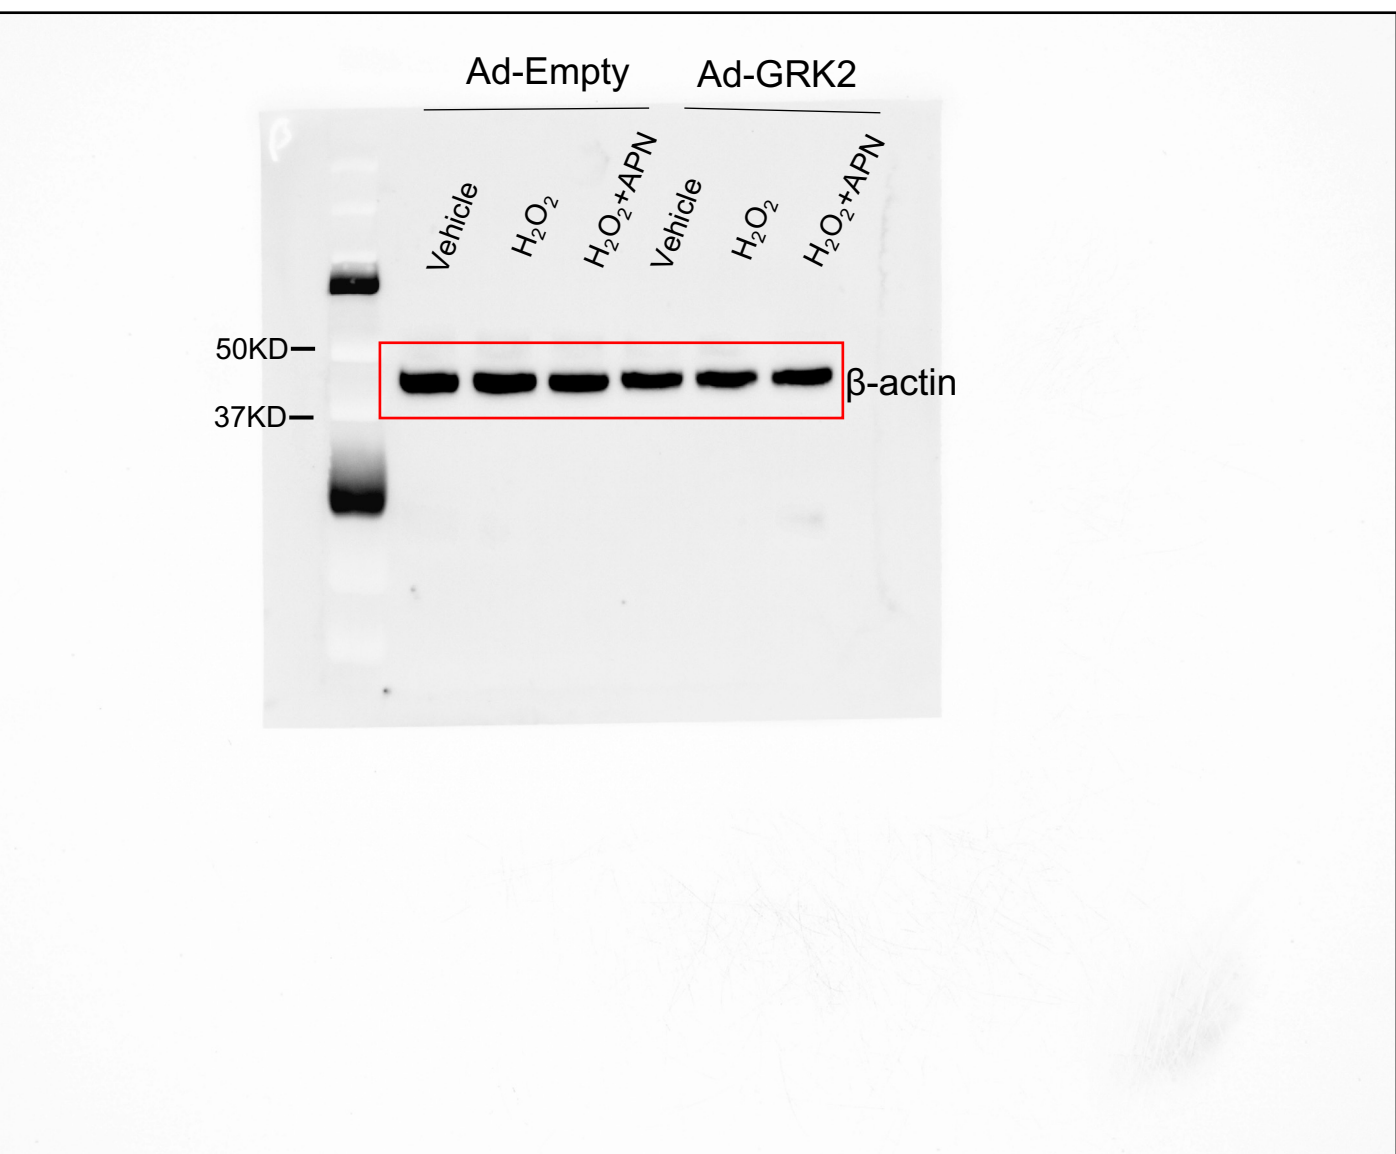

Figure 2E

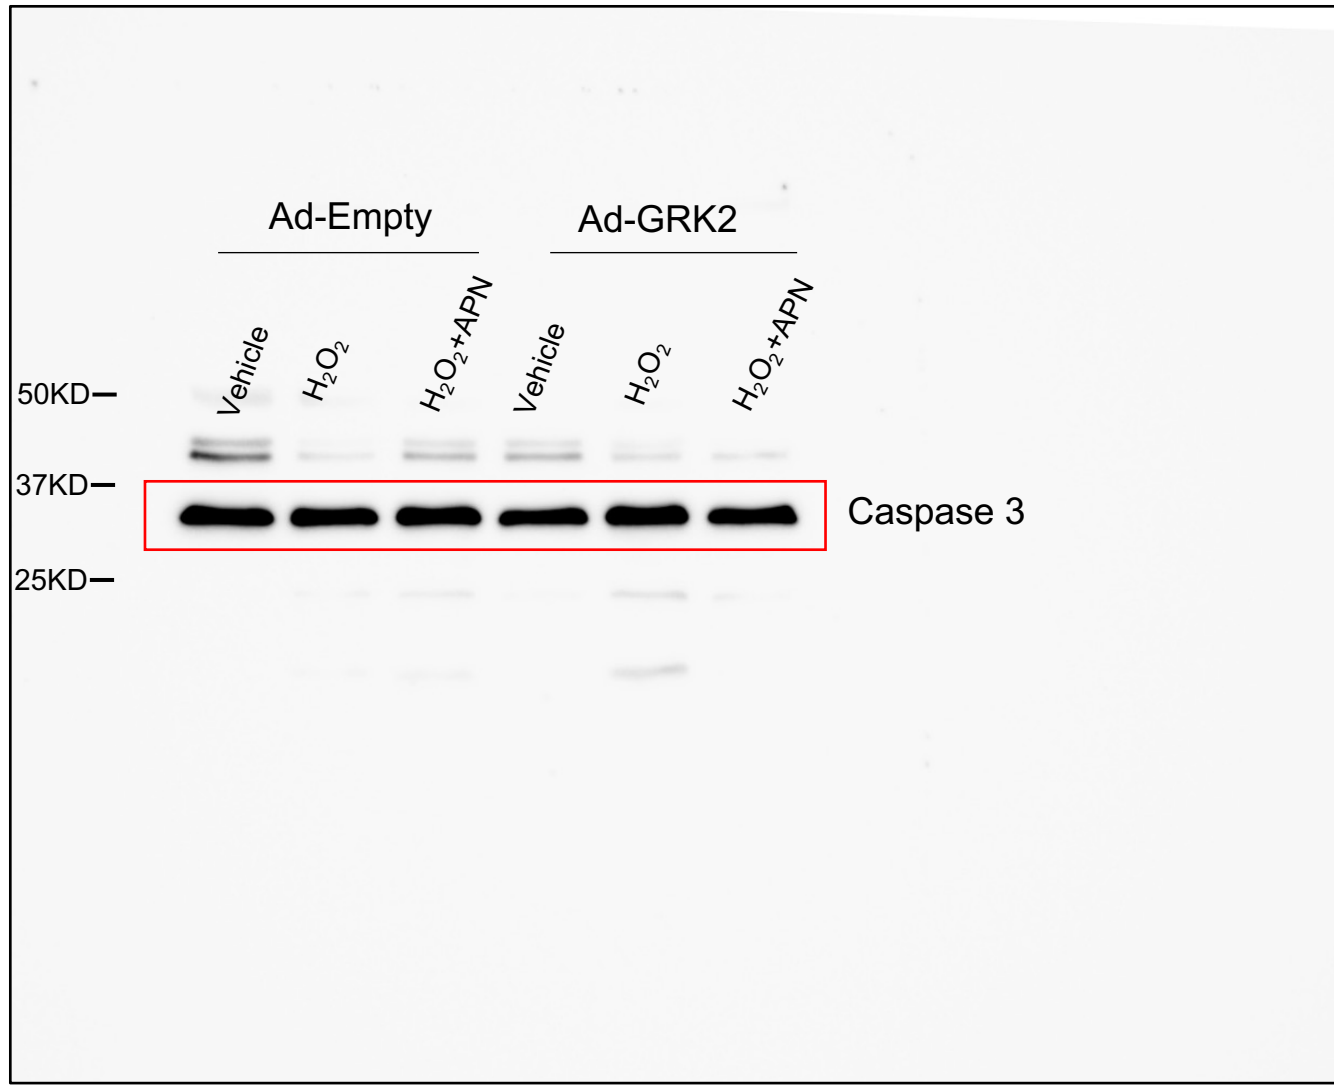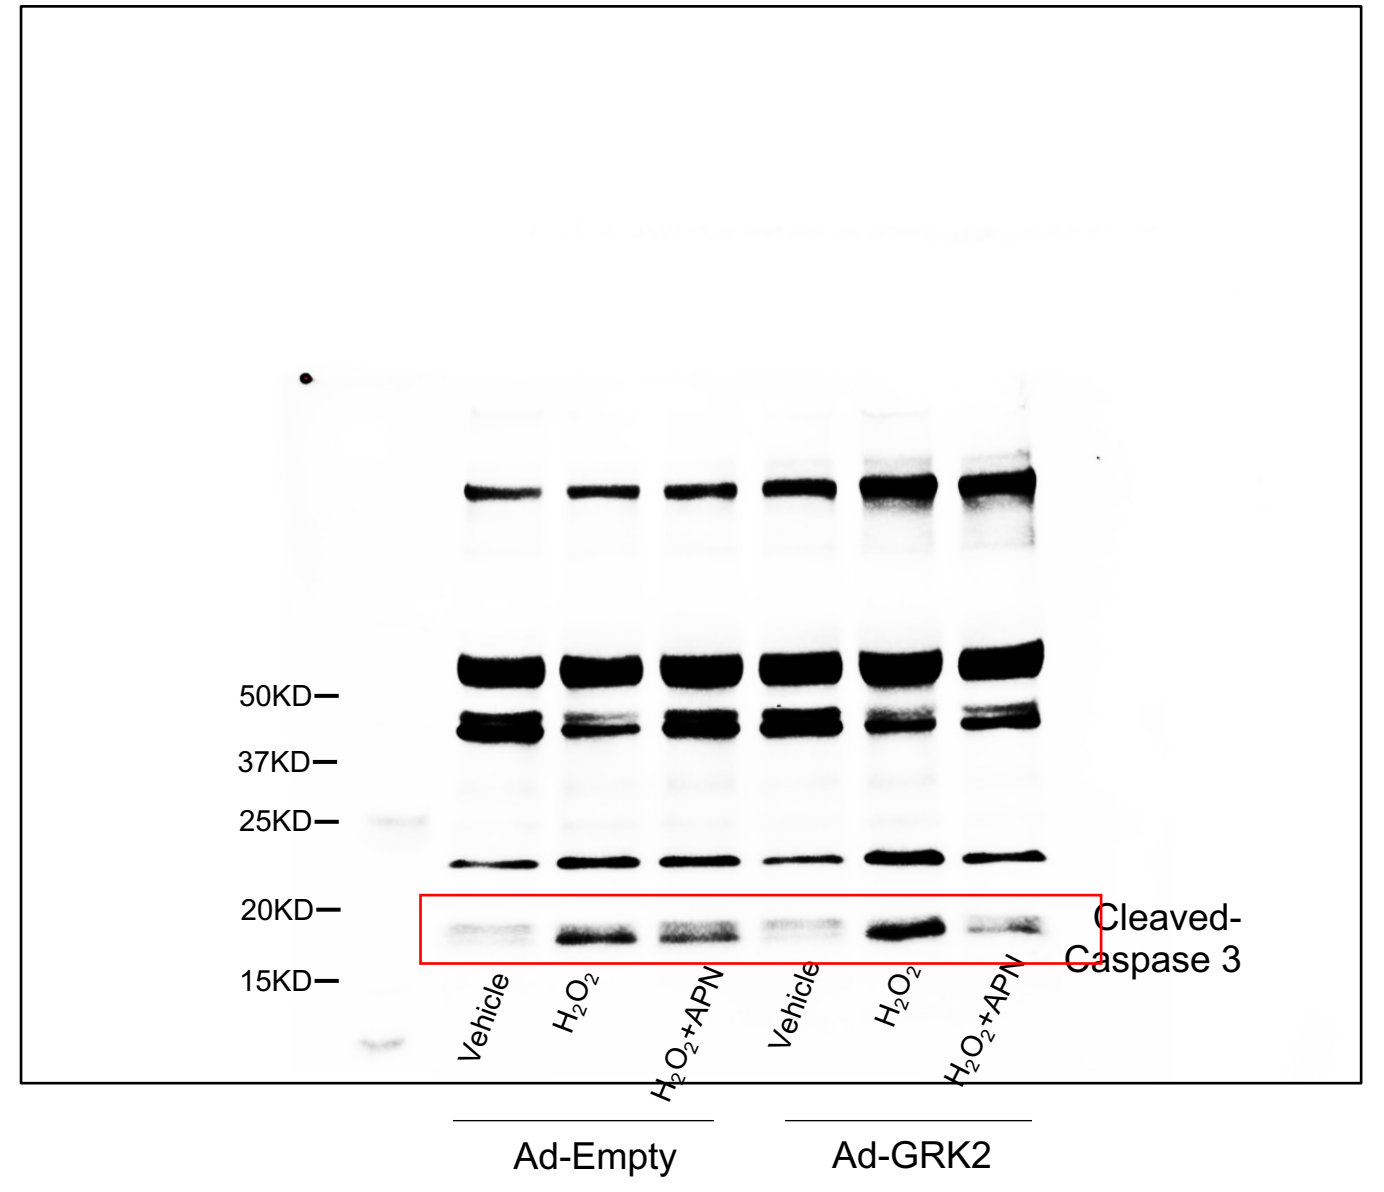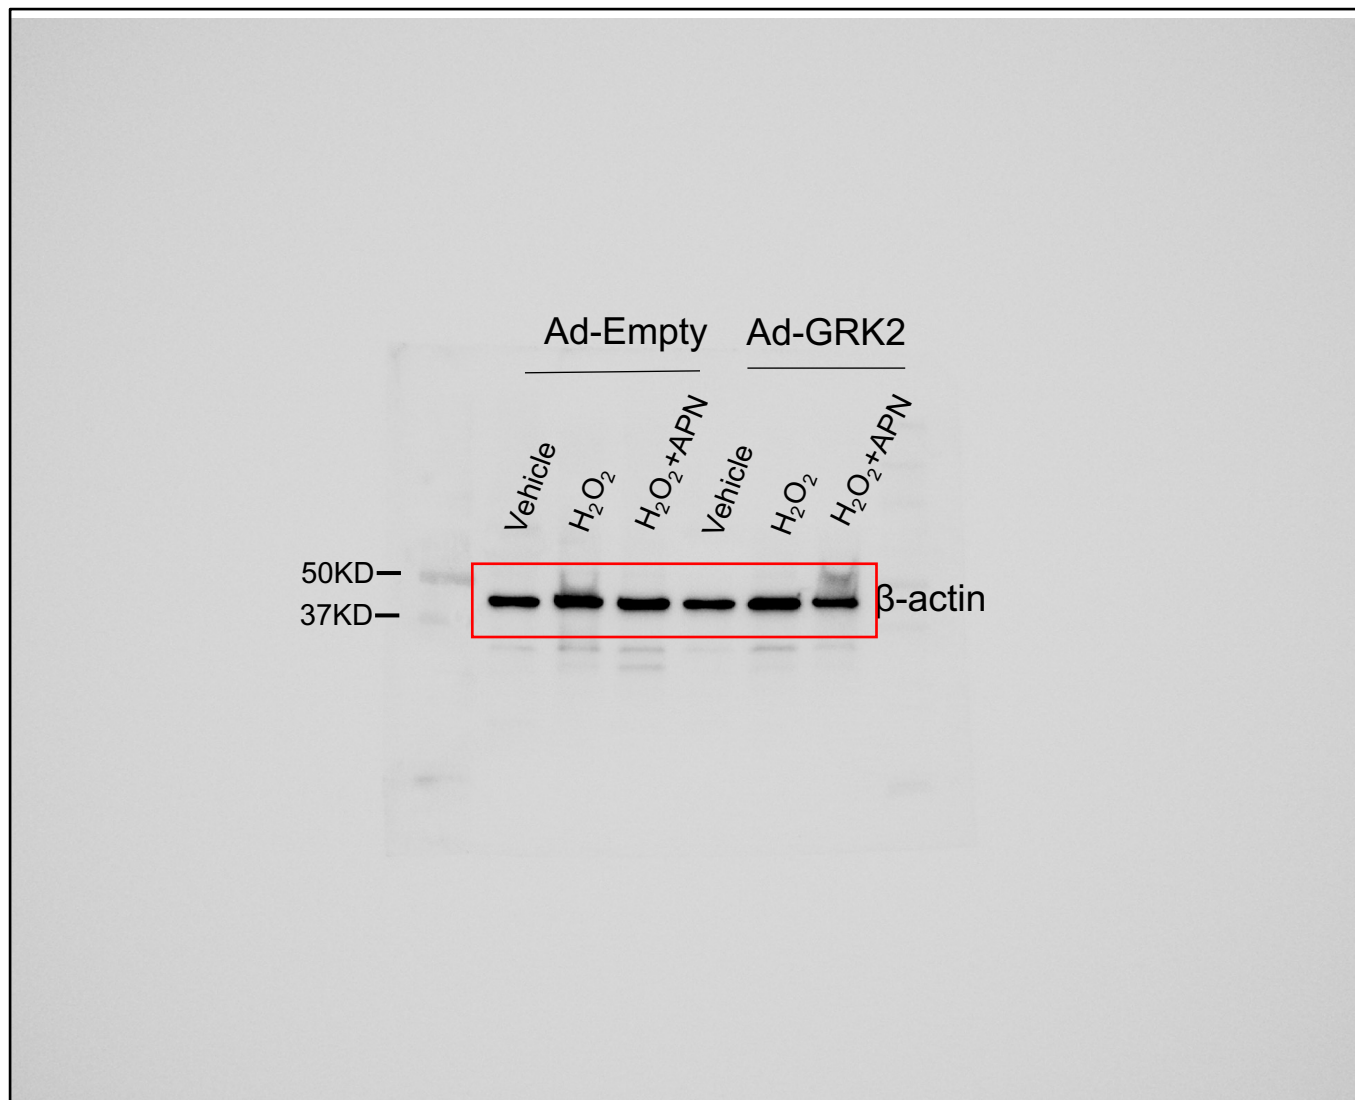

Figure 2F

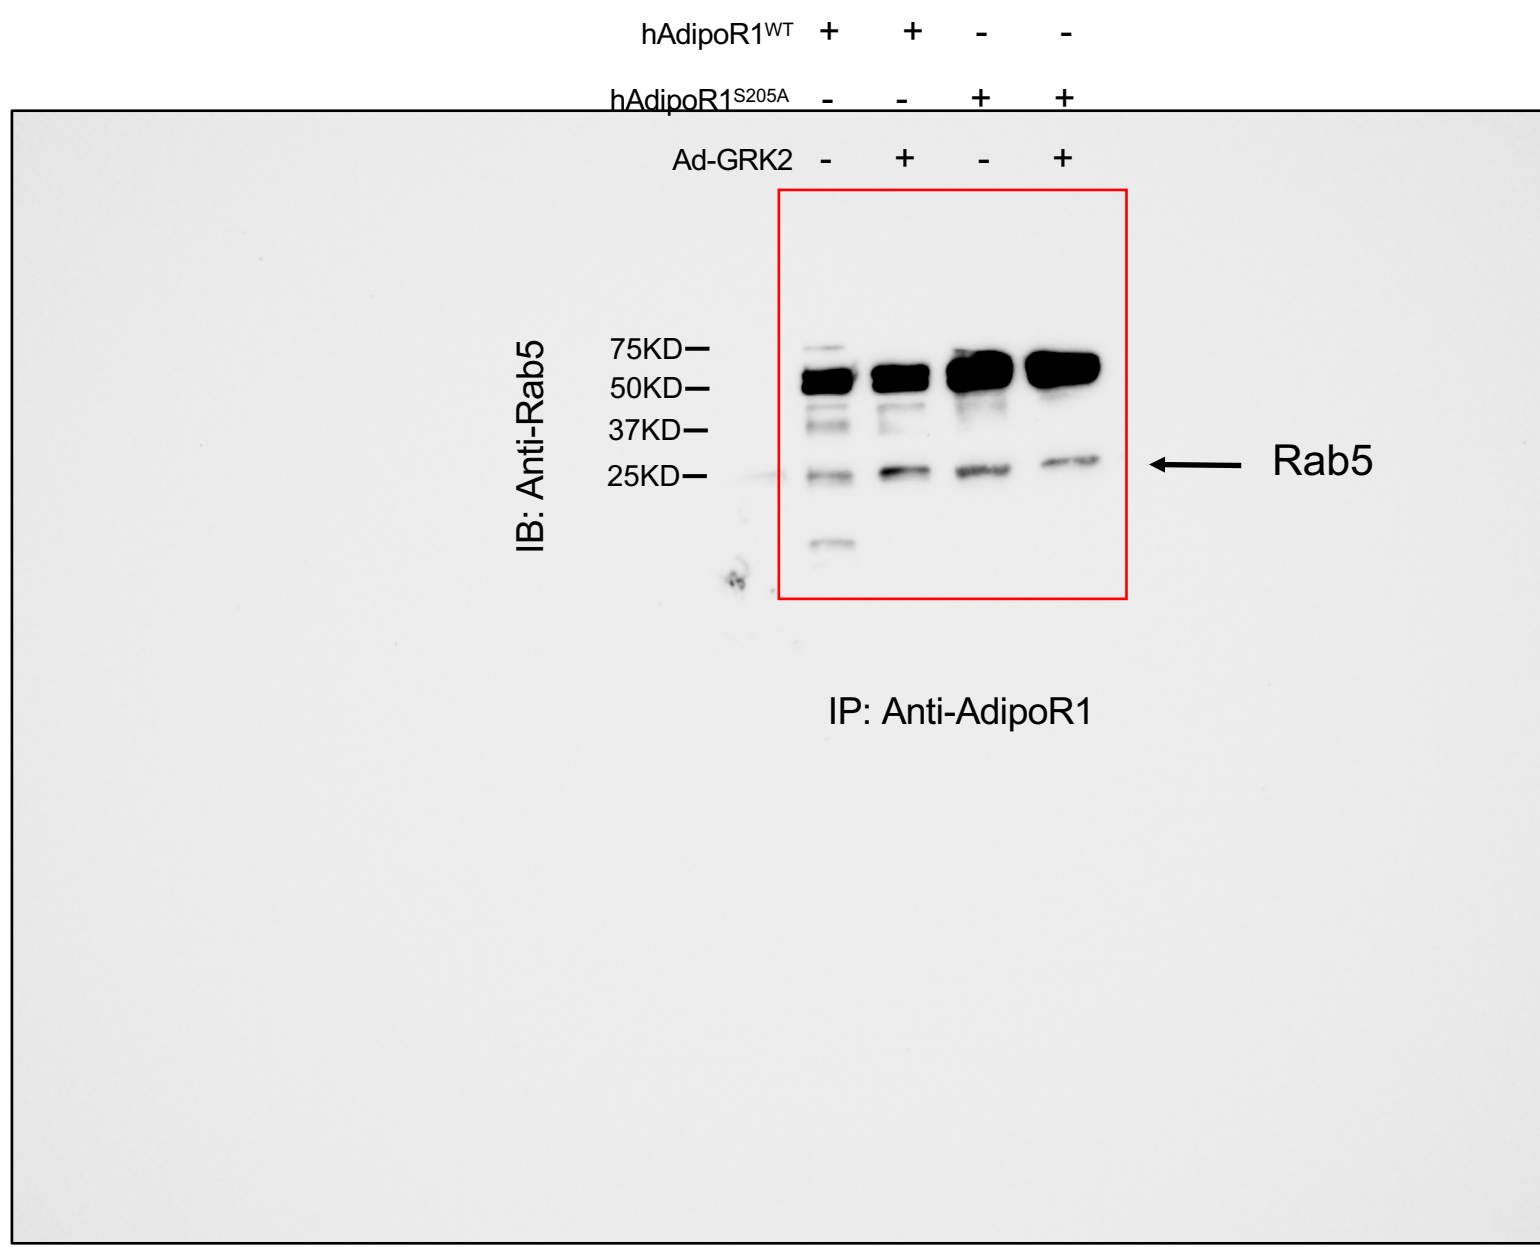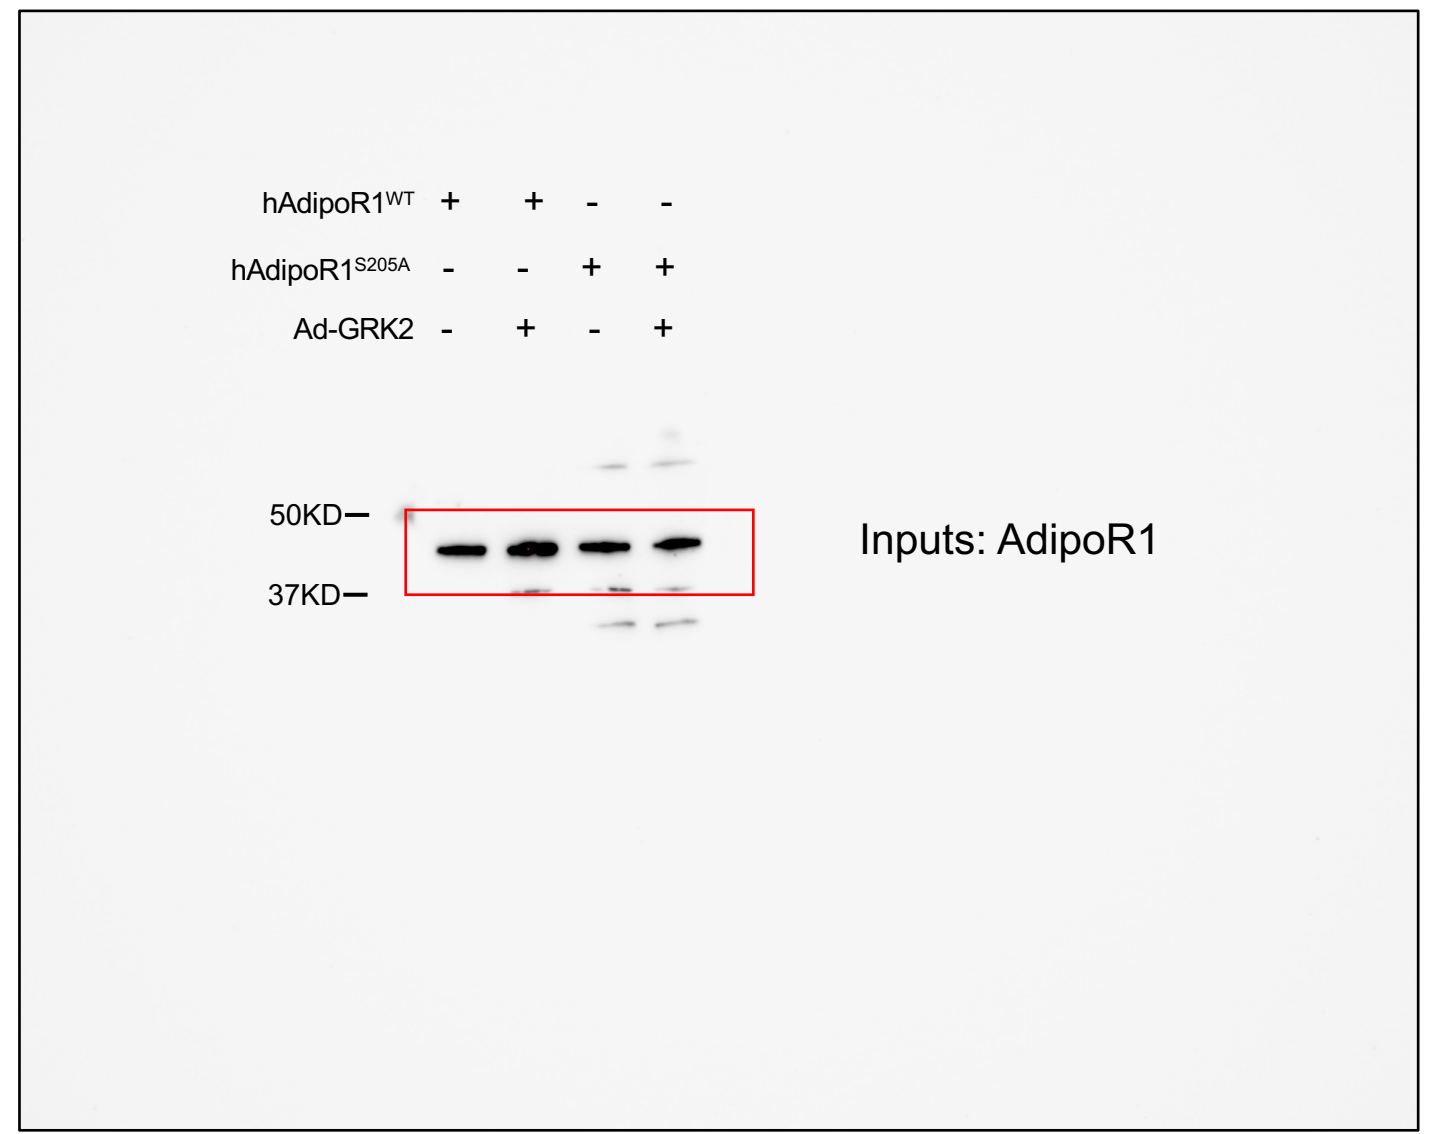

Figure 3F

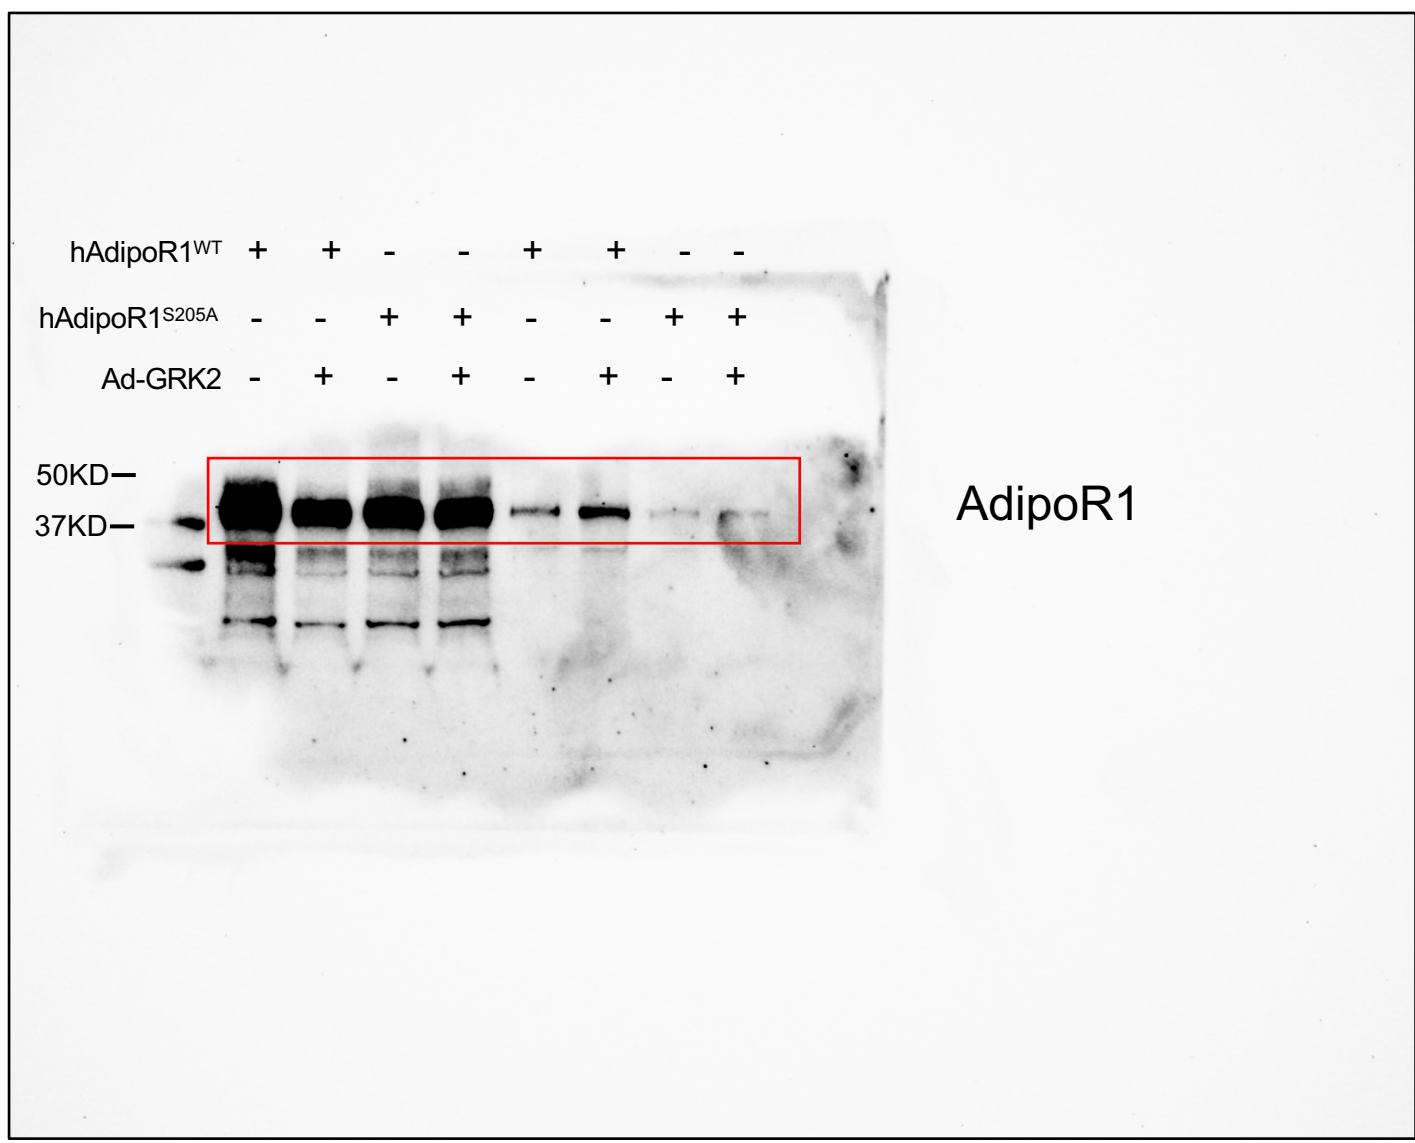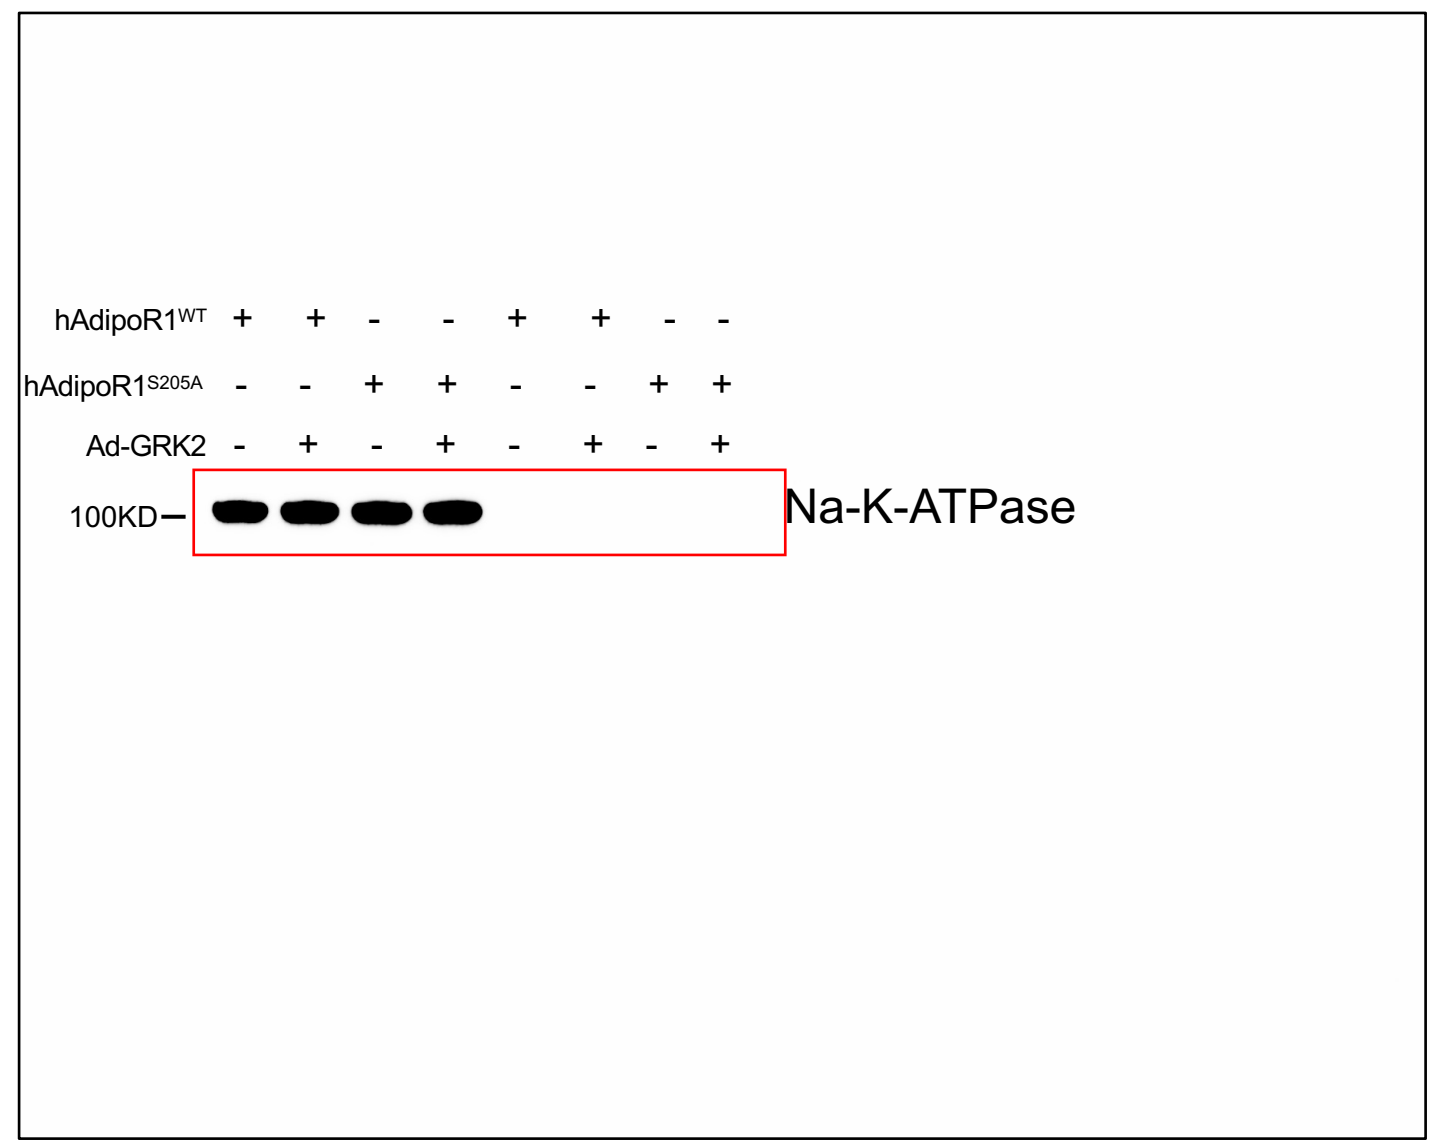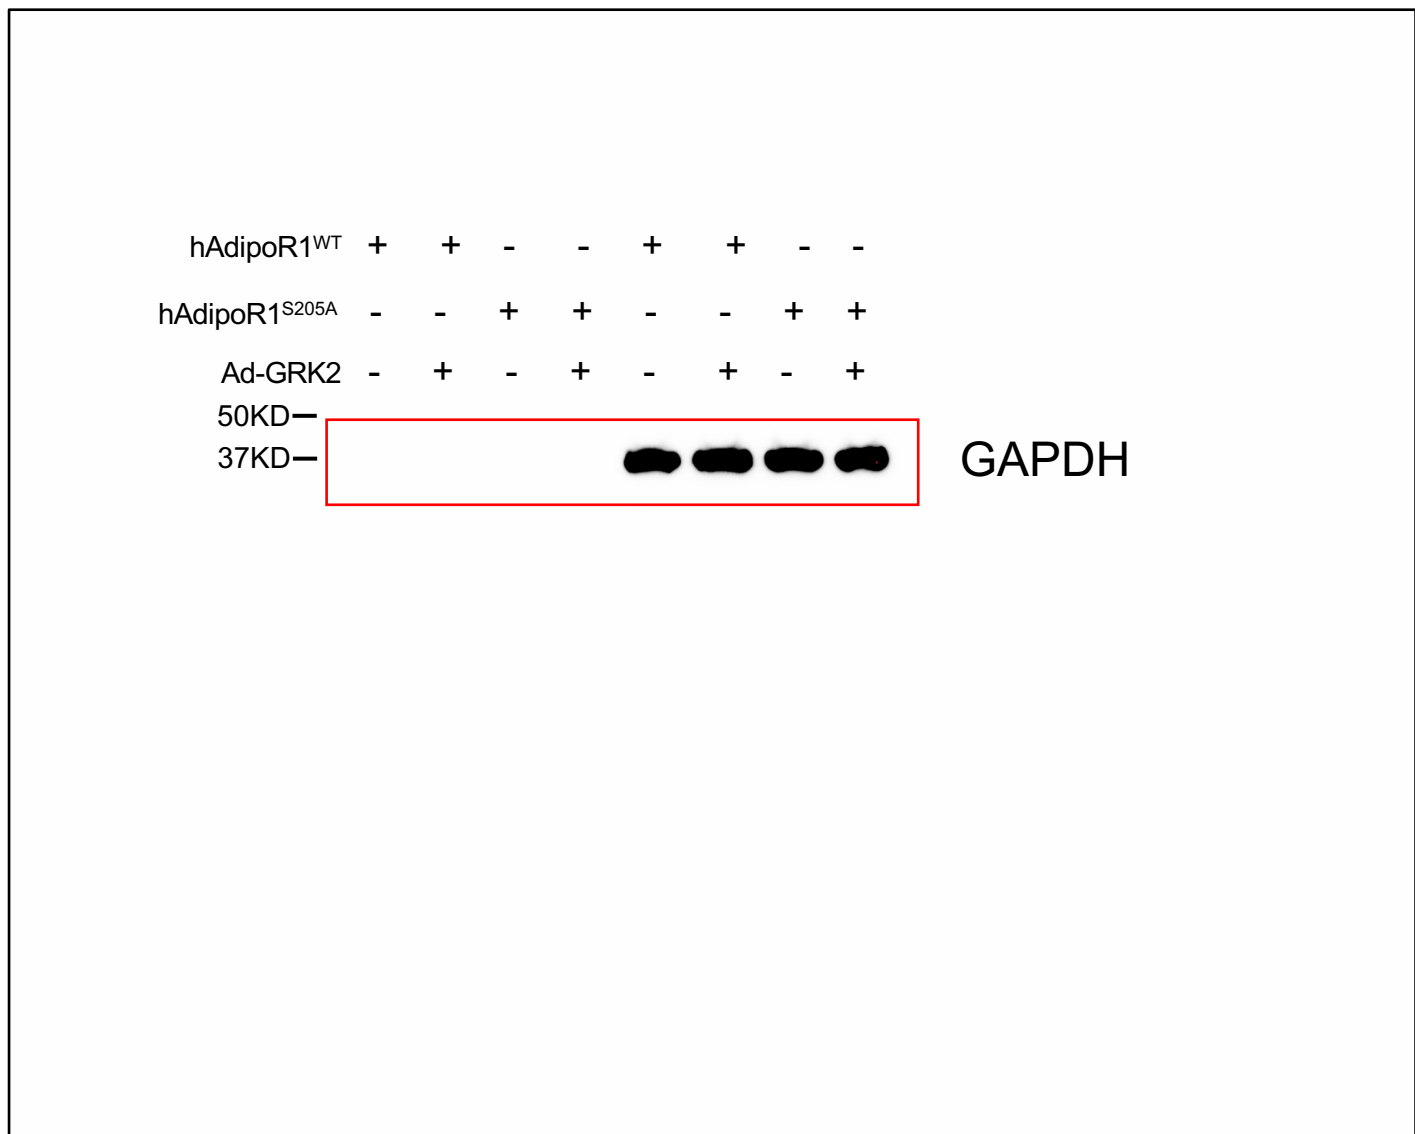

Figure 3G



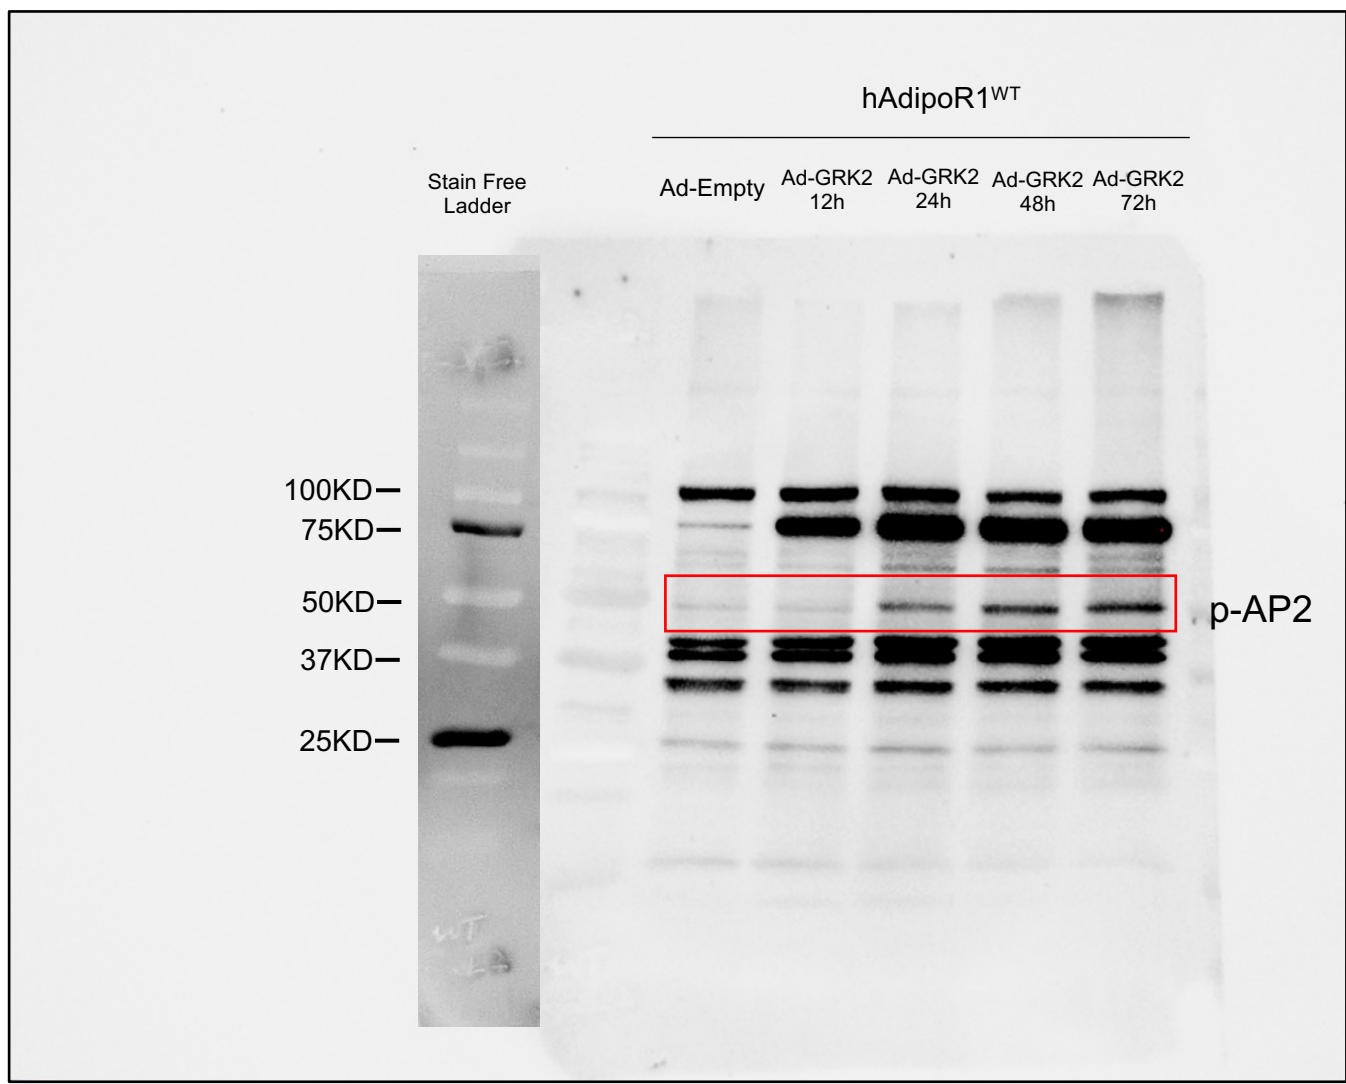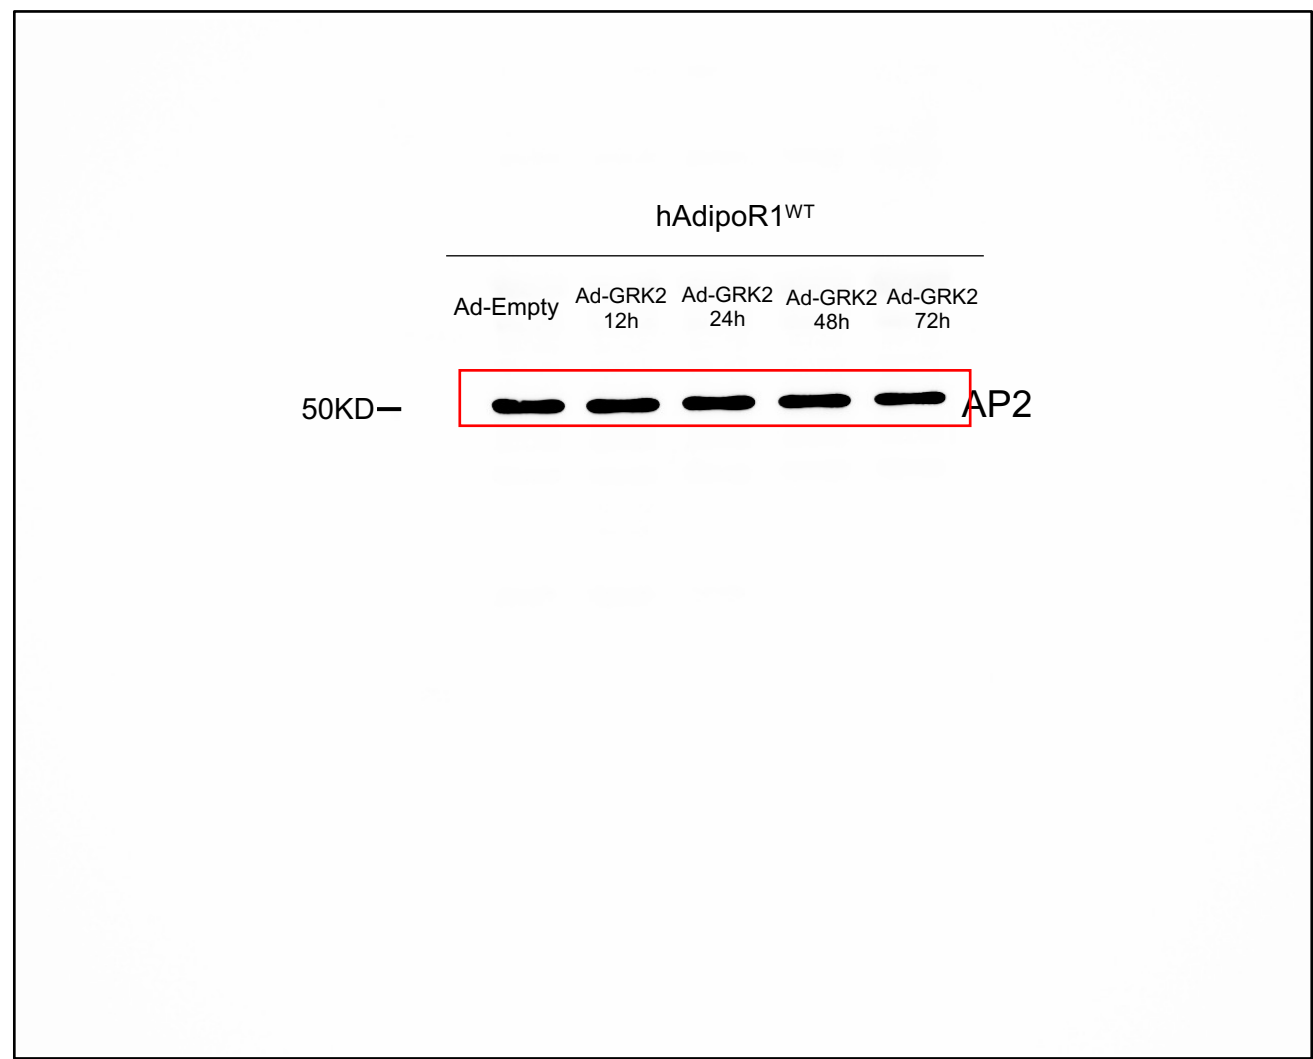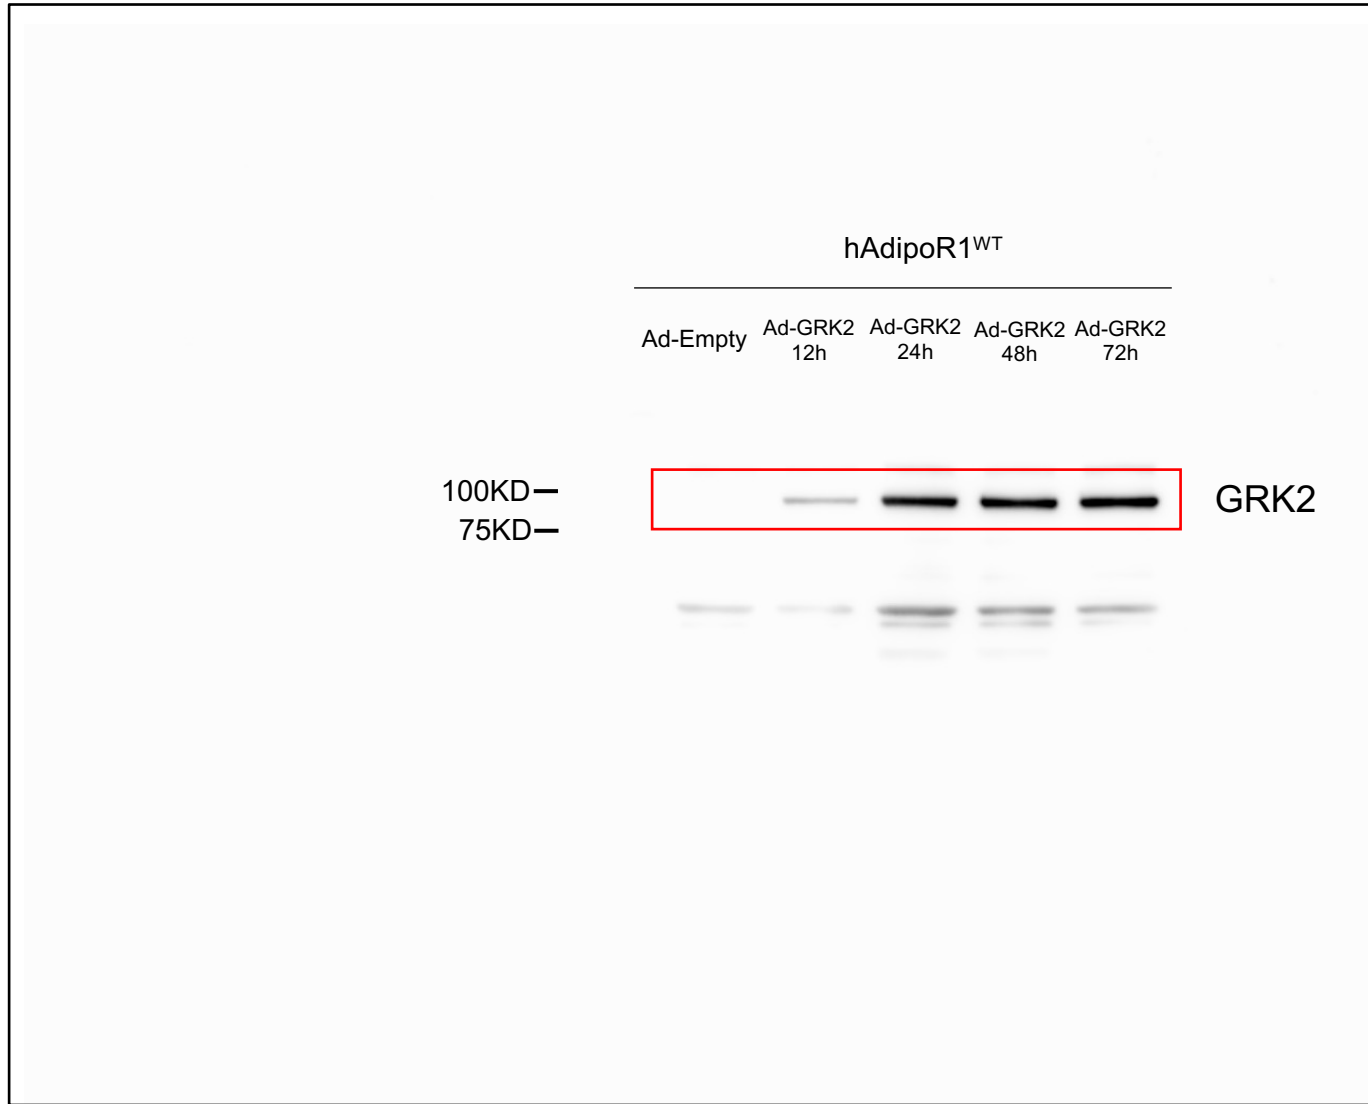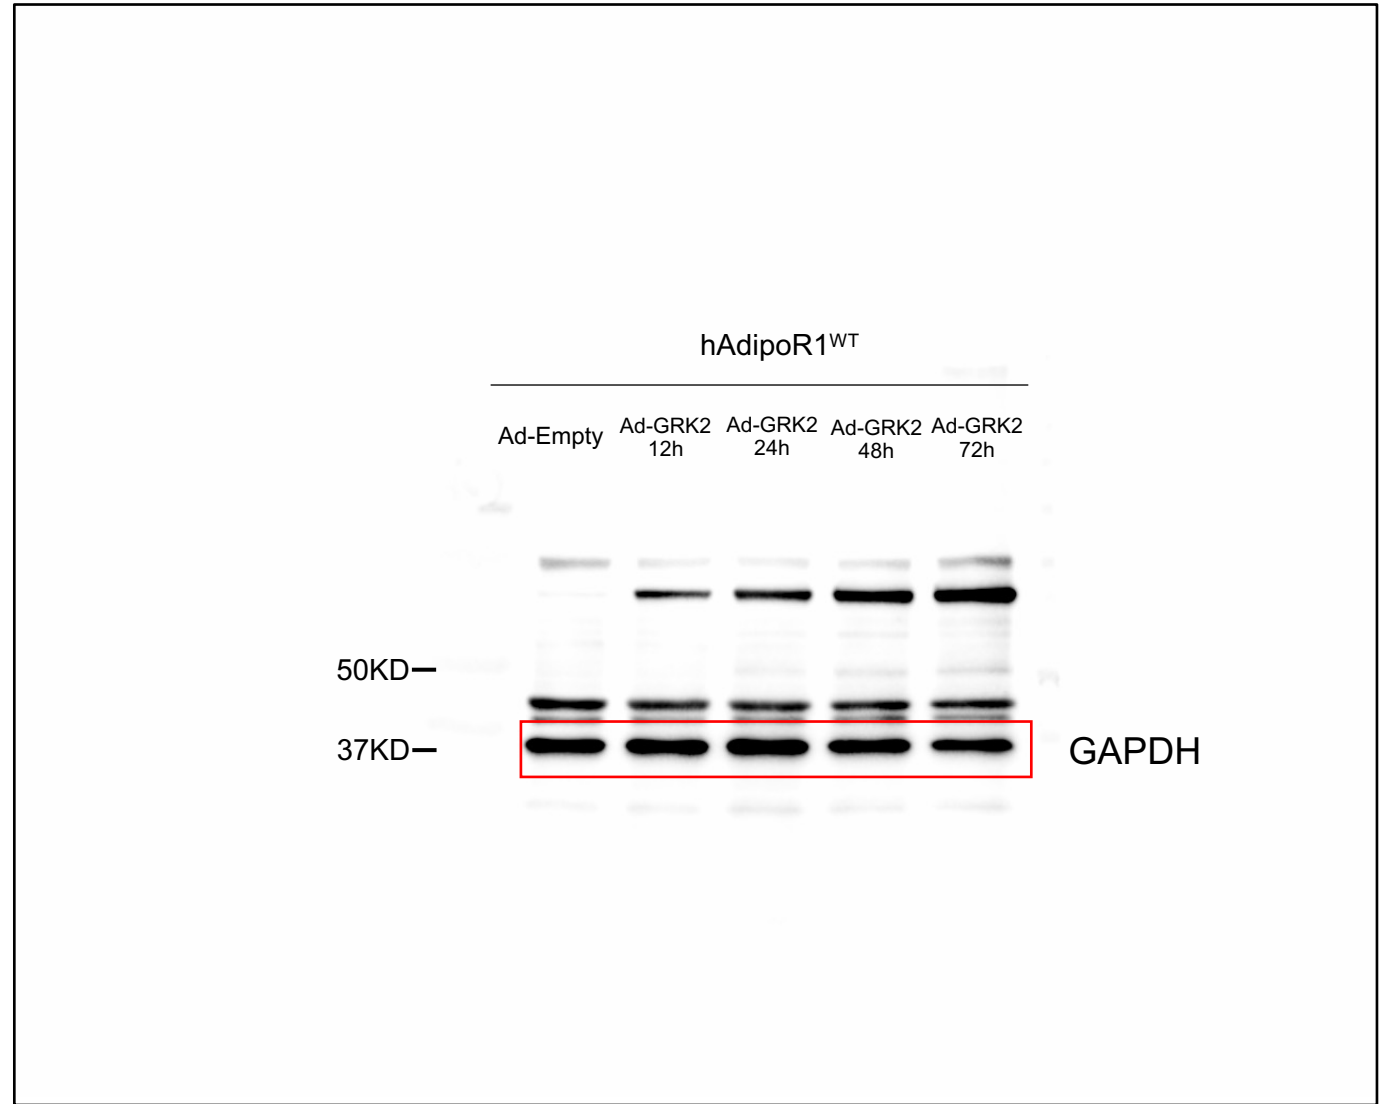

Figure 4D

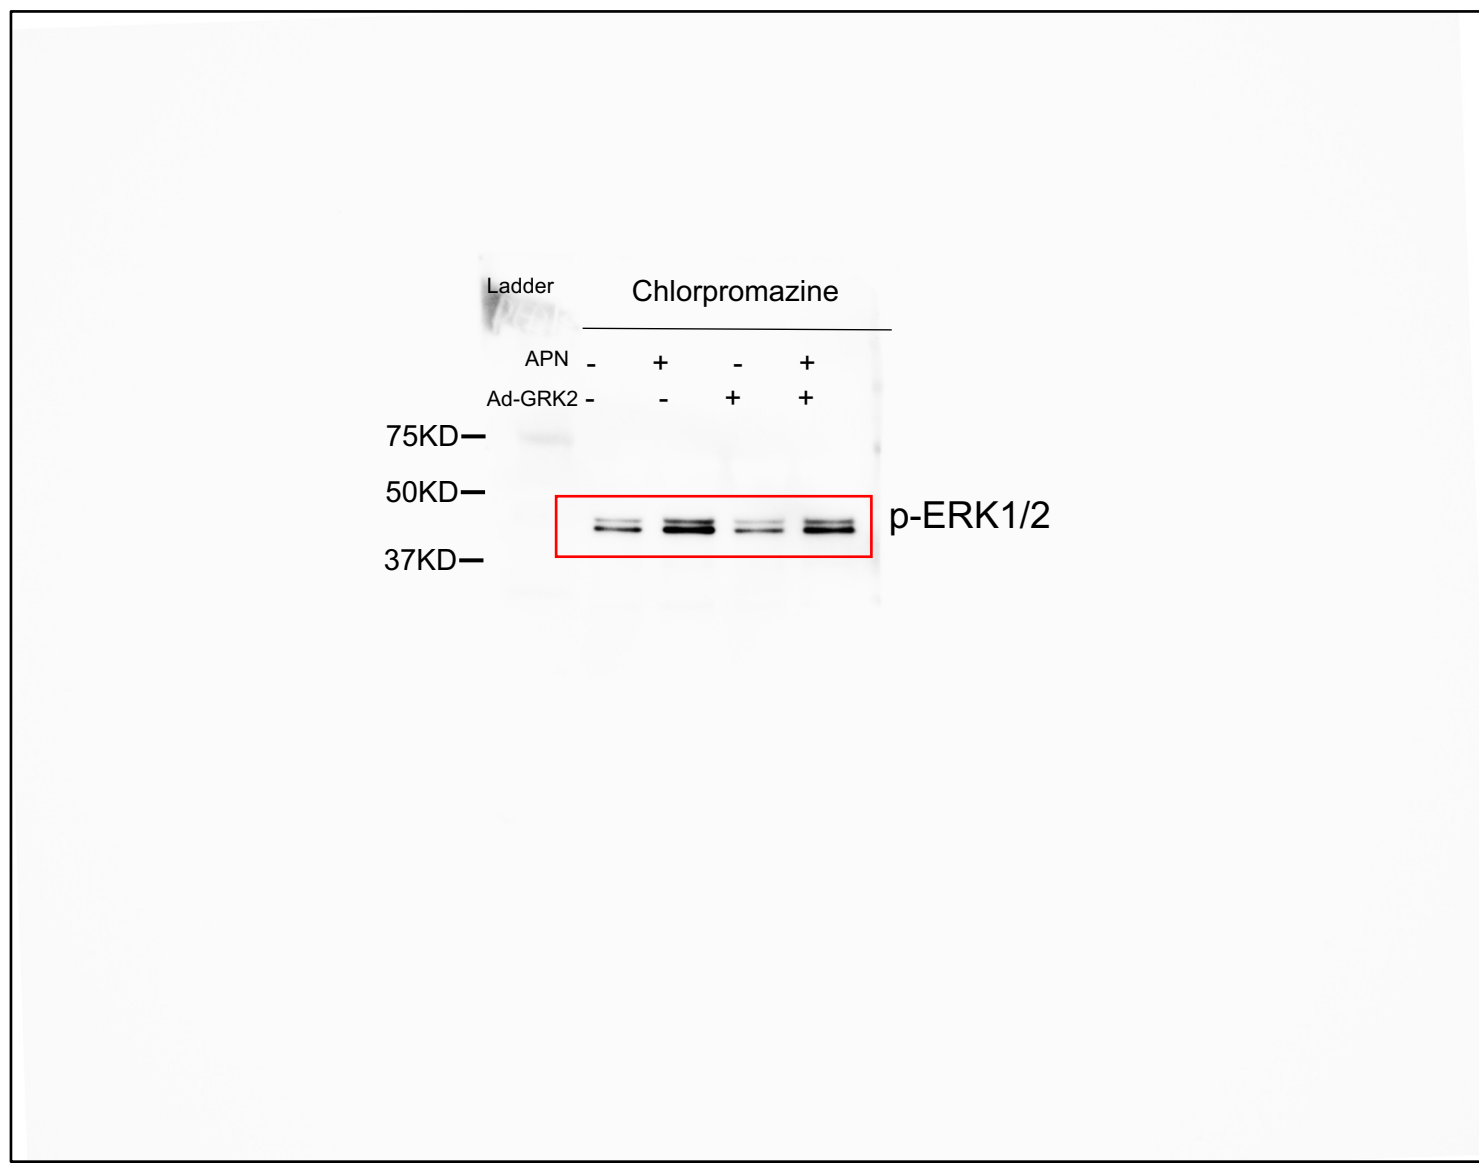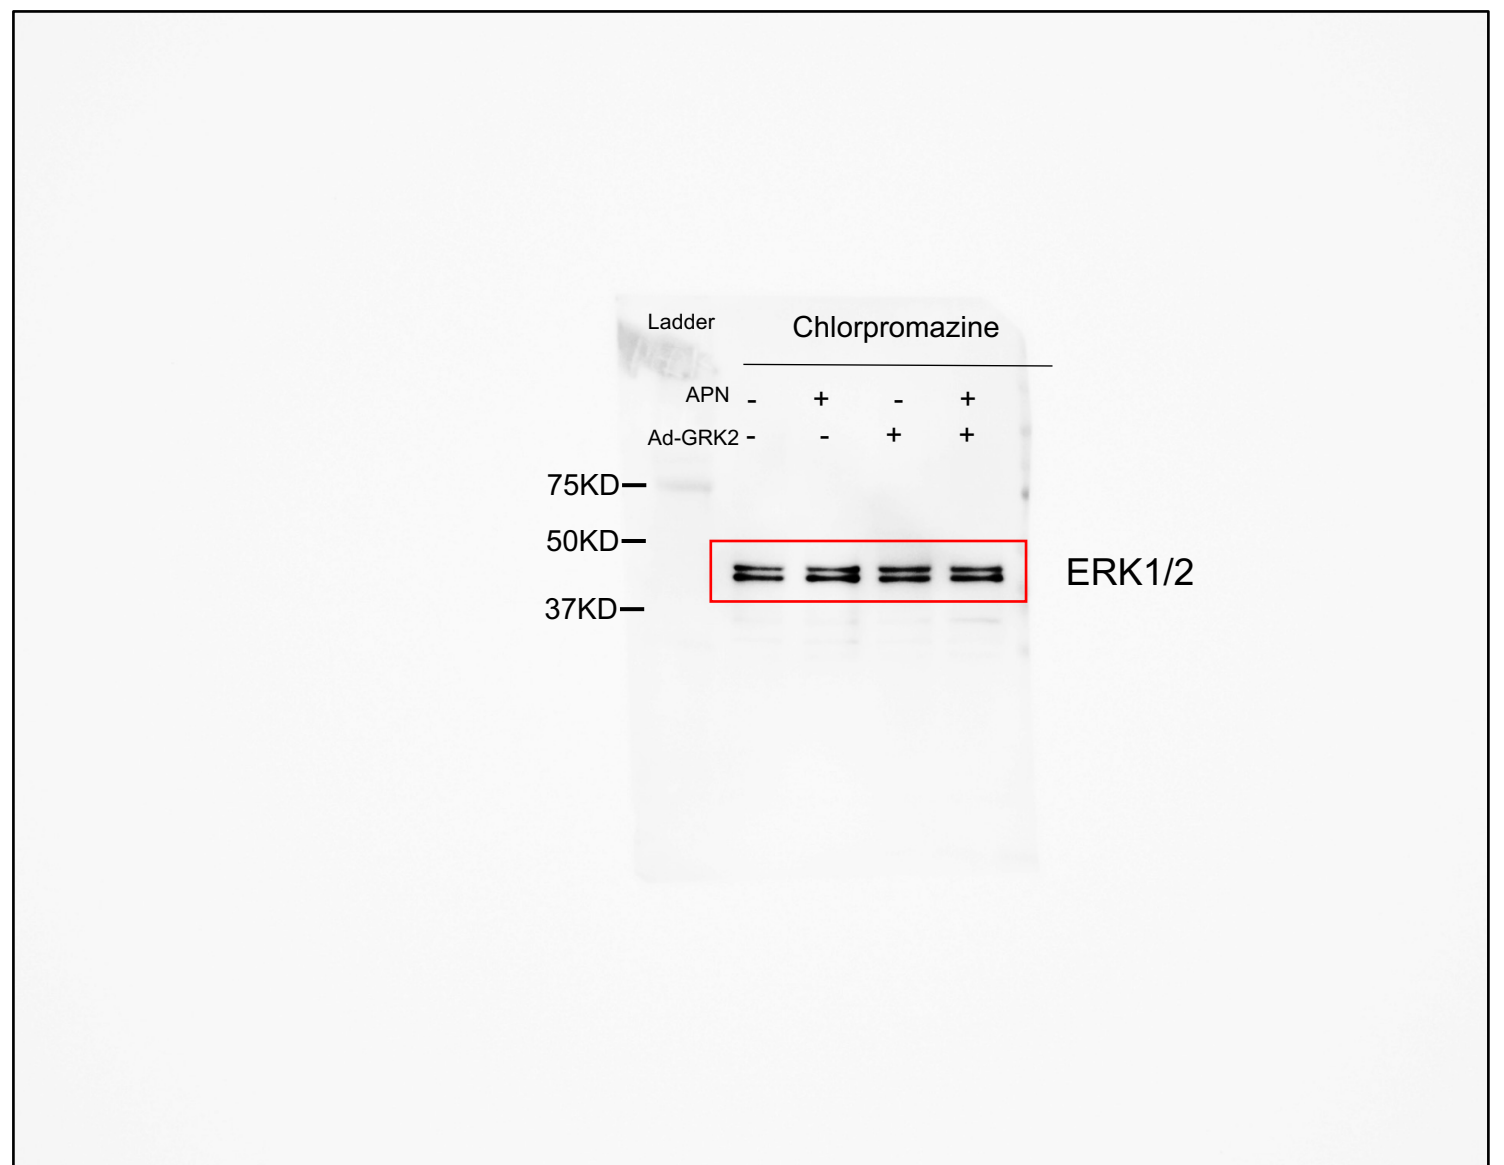

Figure 4E

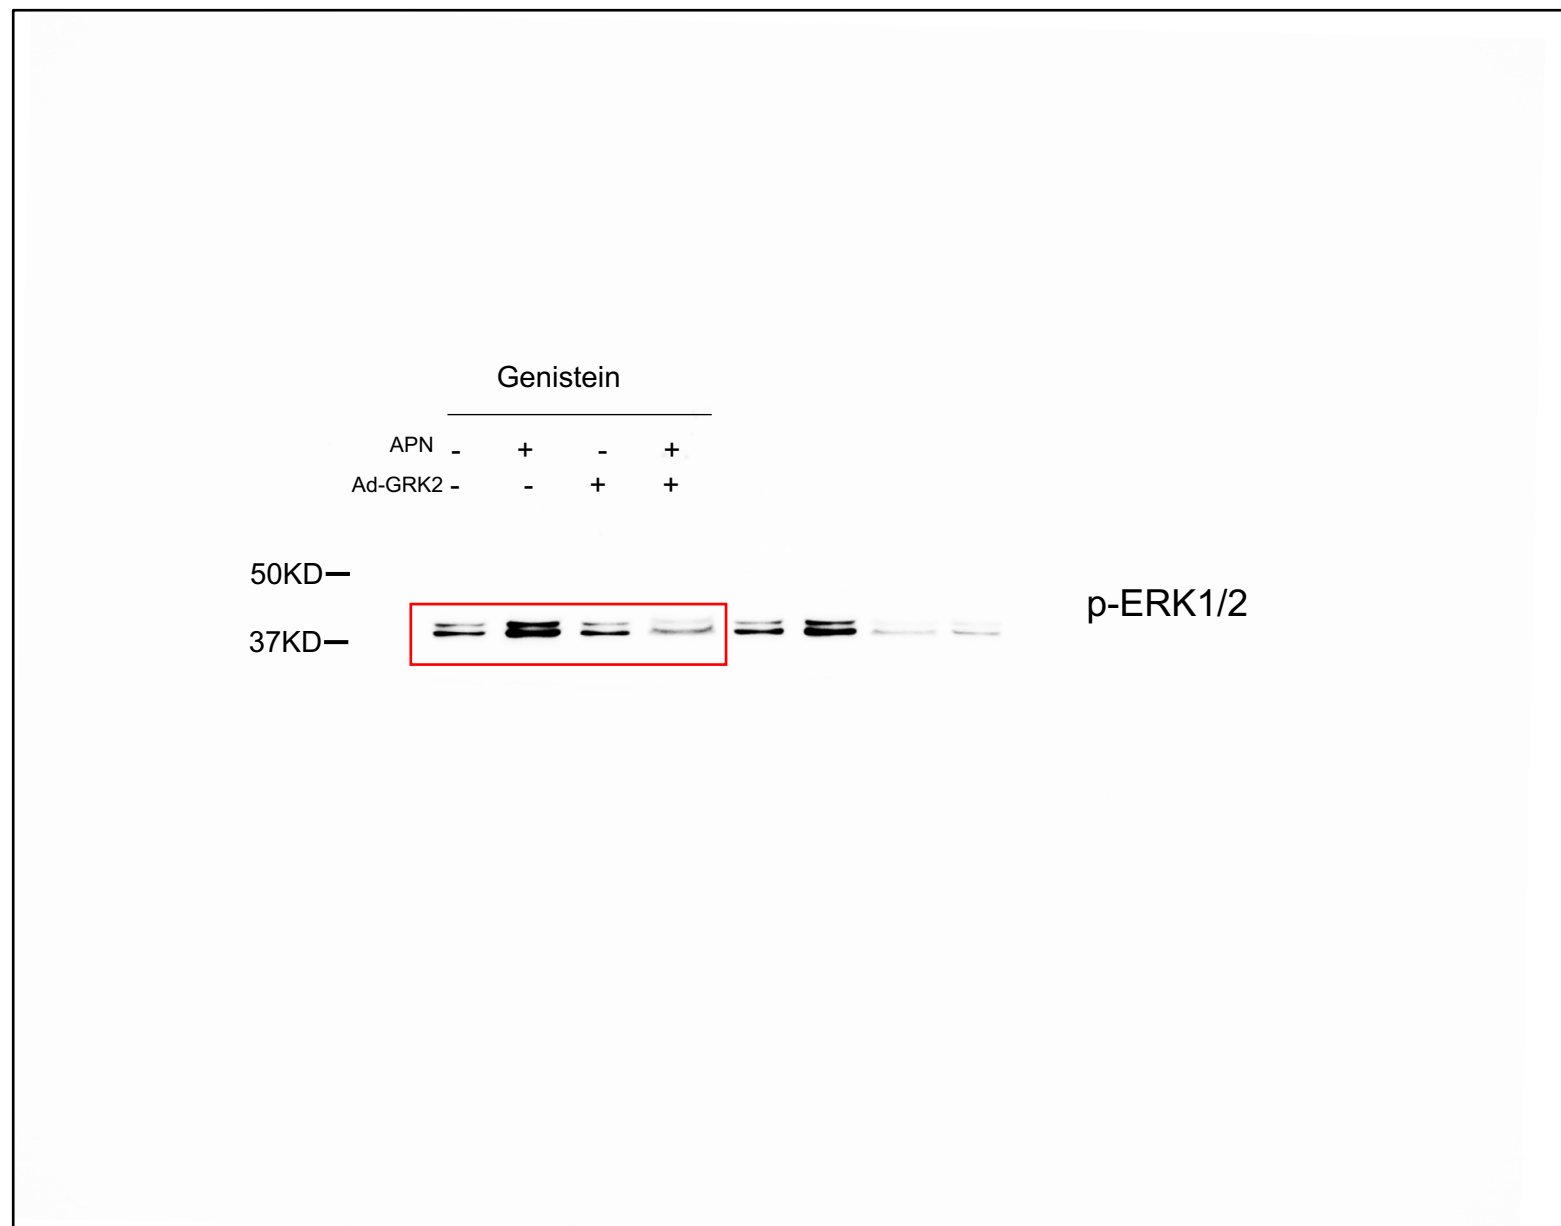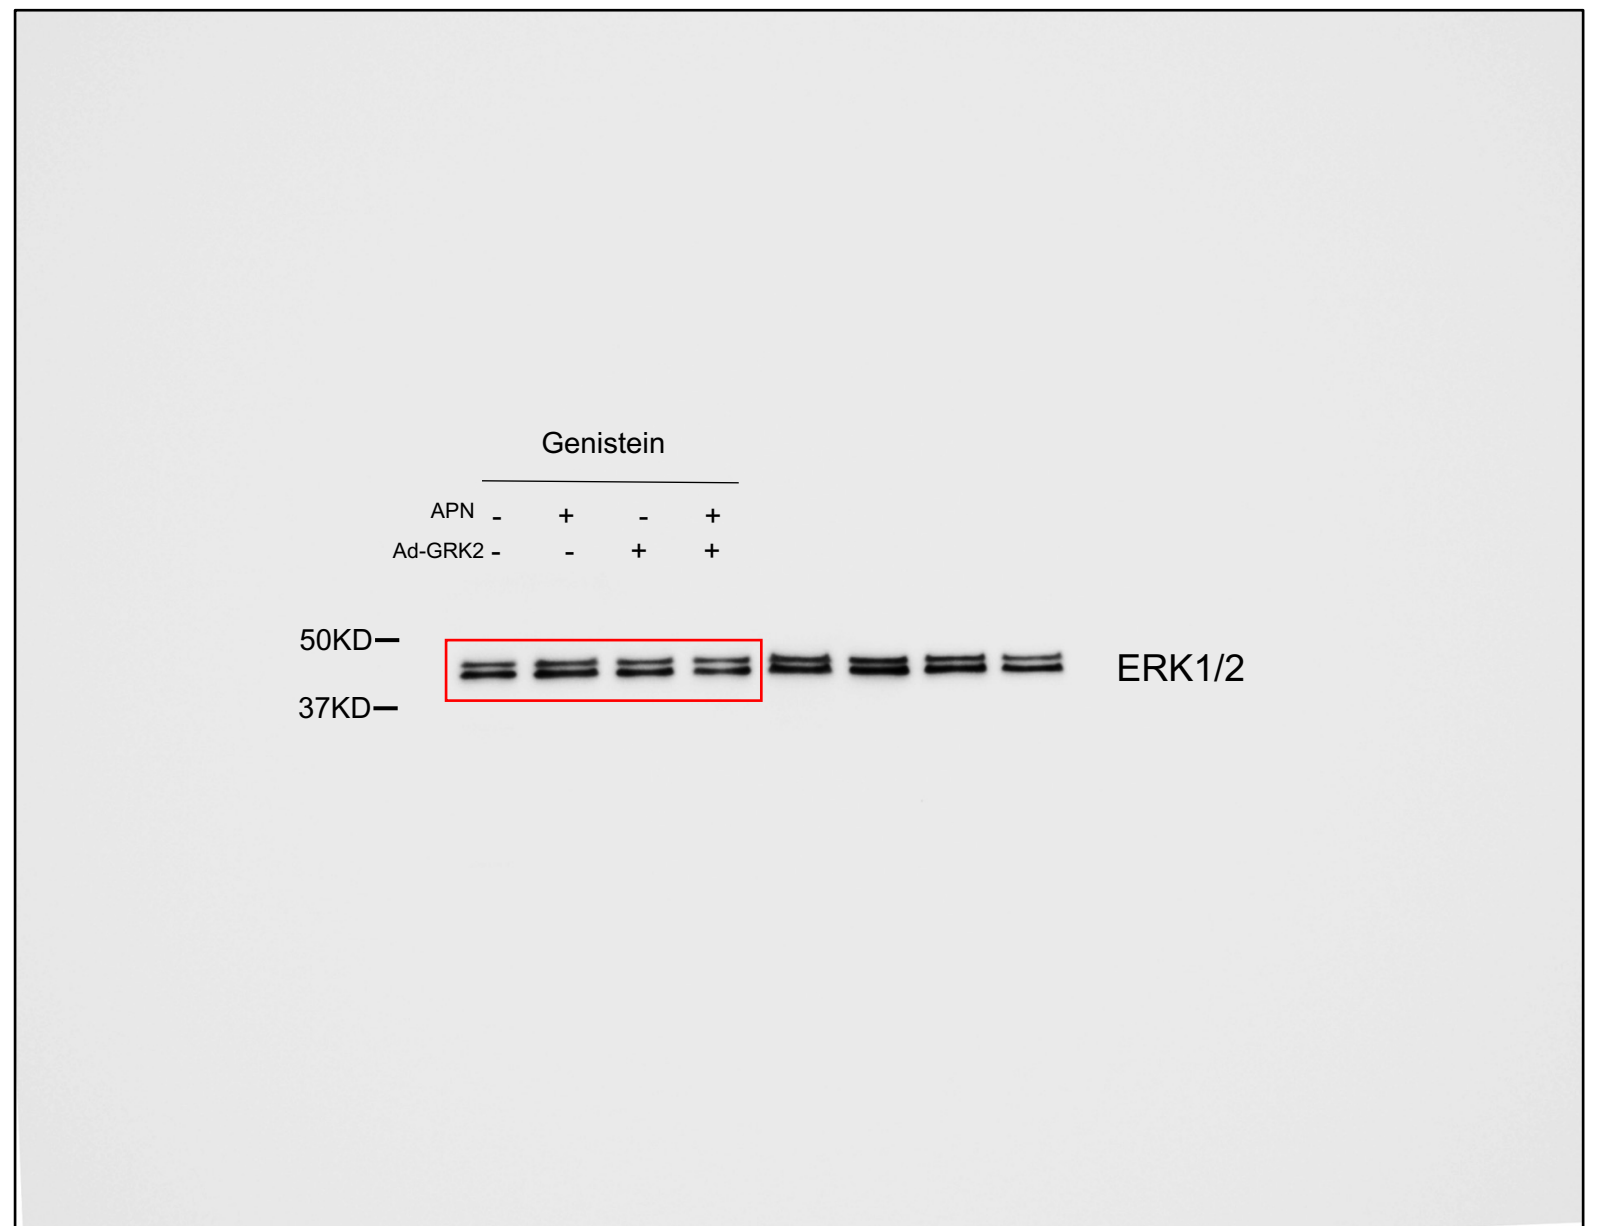

Figure 4F

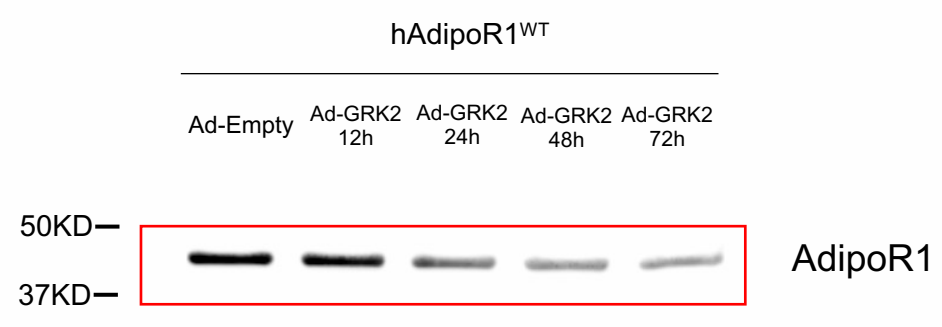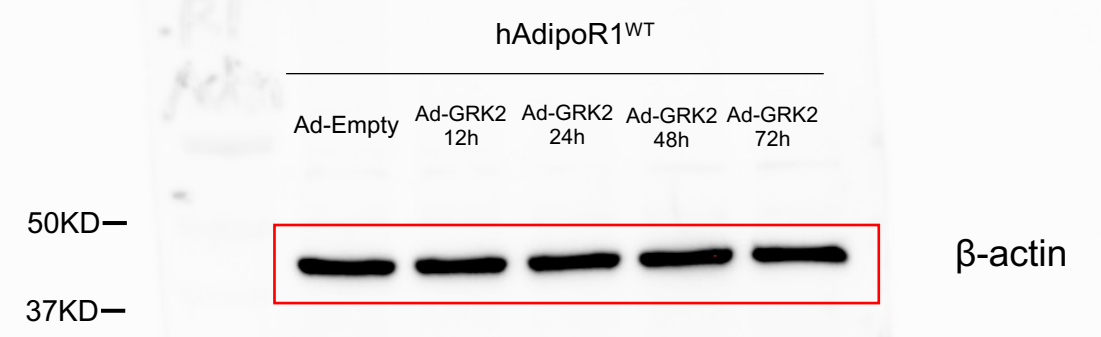

Figure 5A

Vehicle

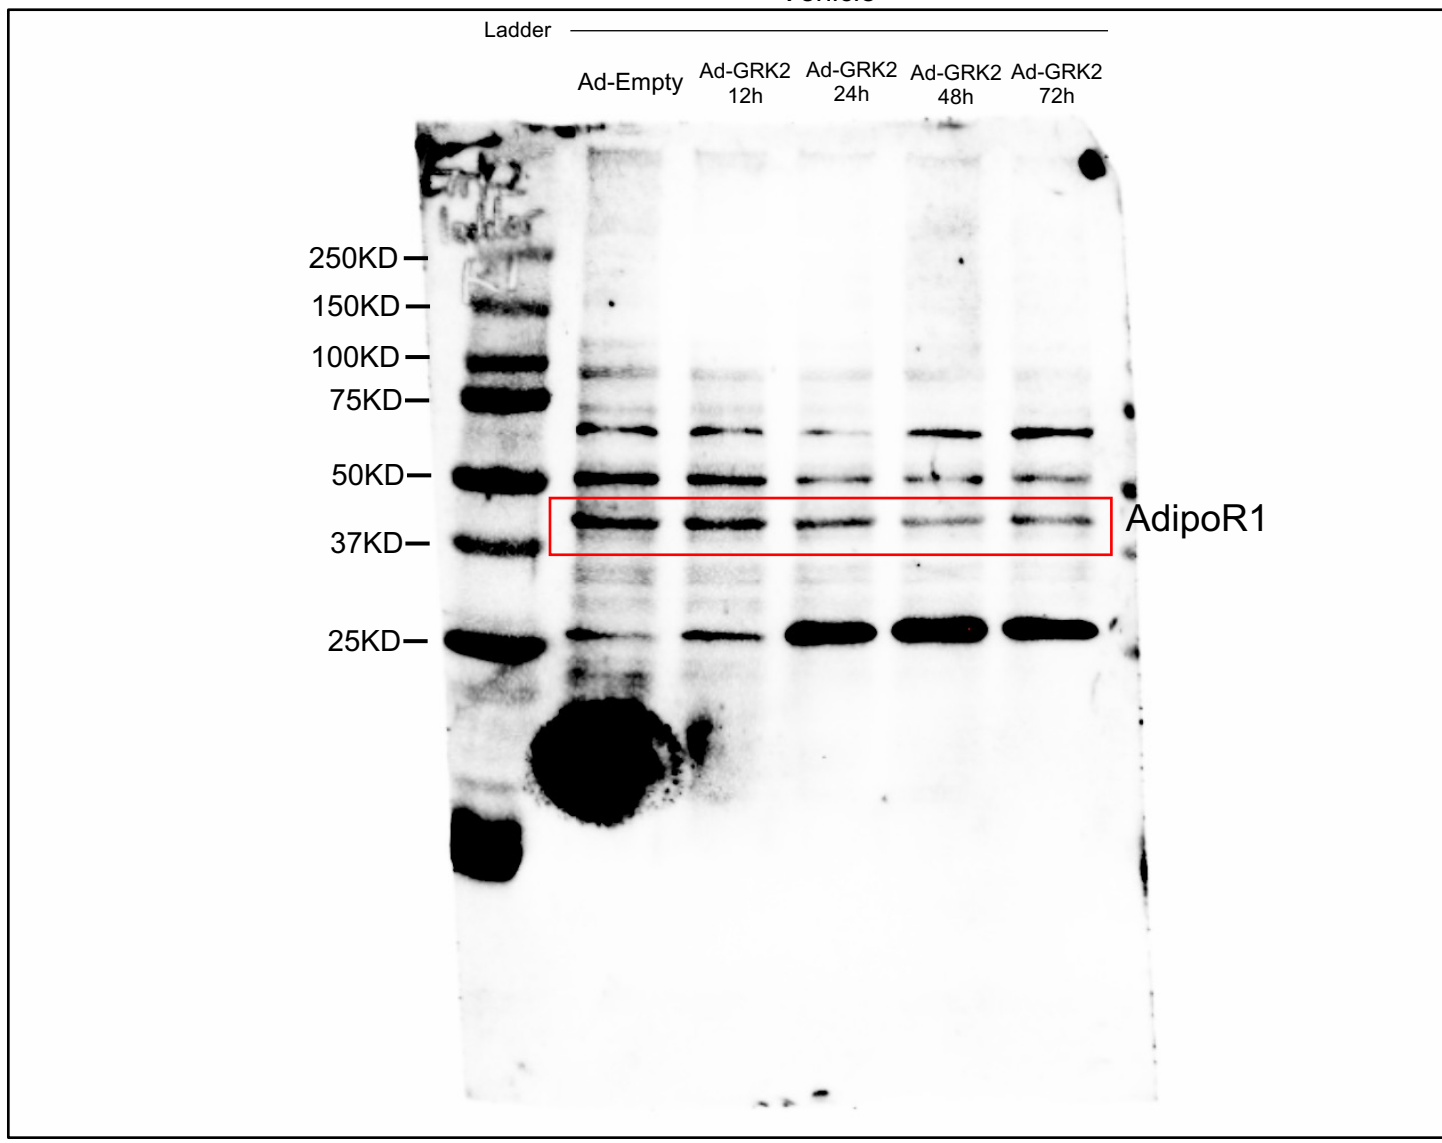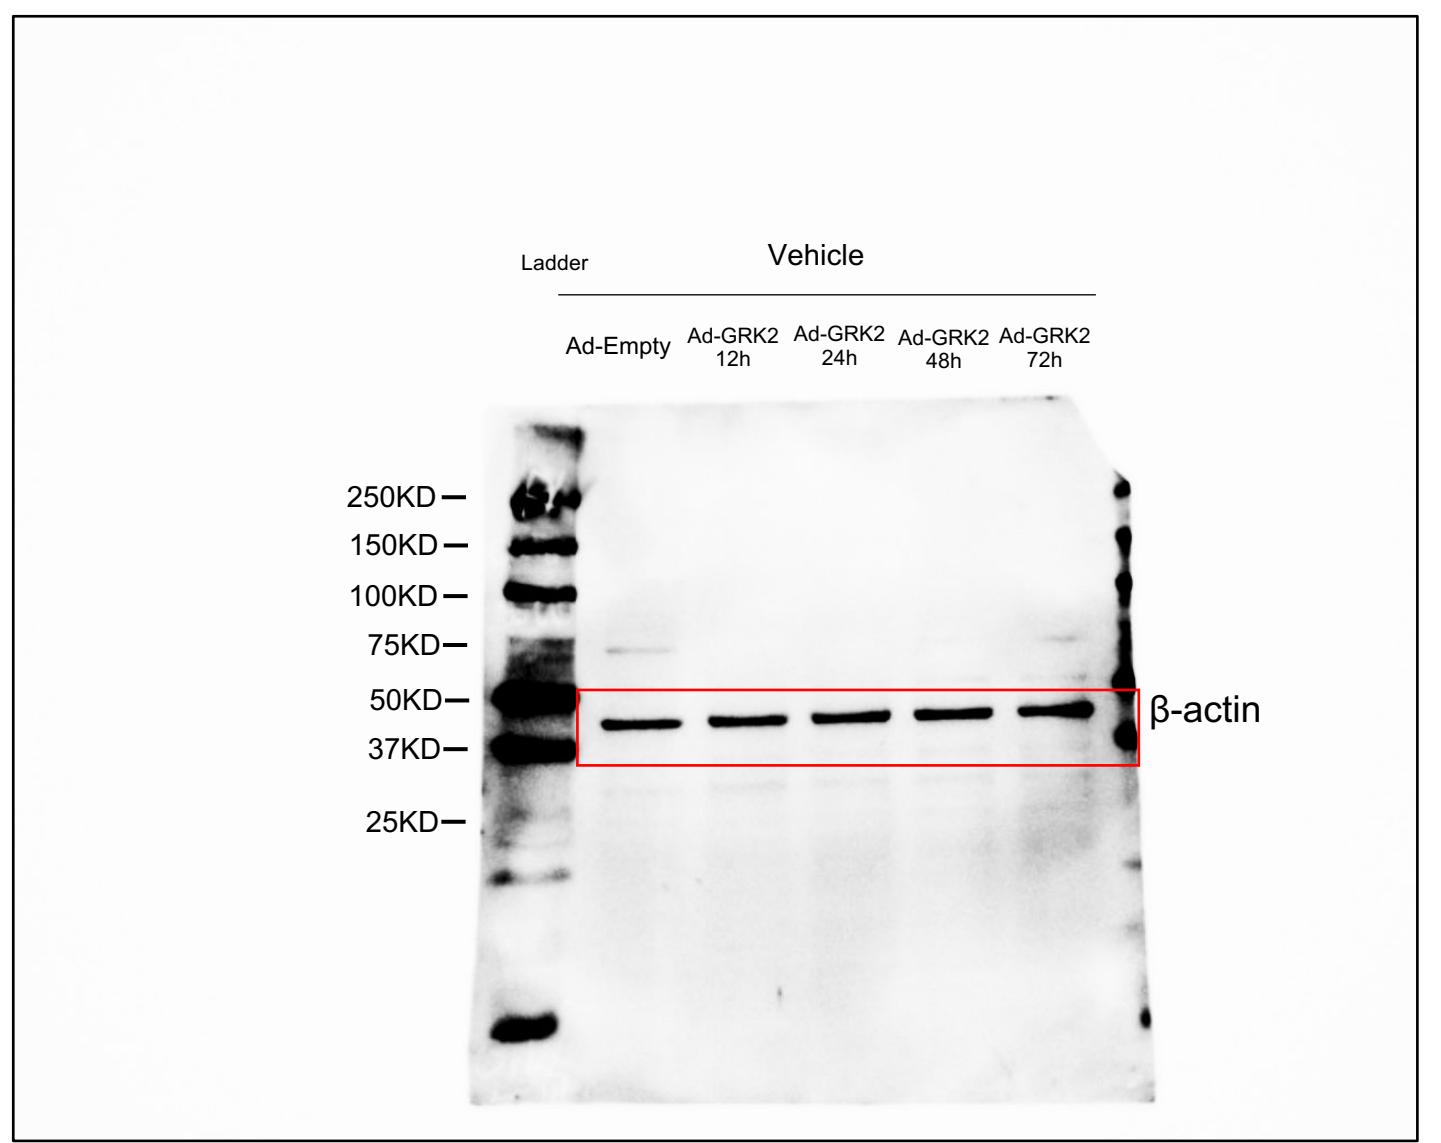

MG-132

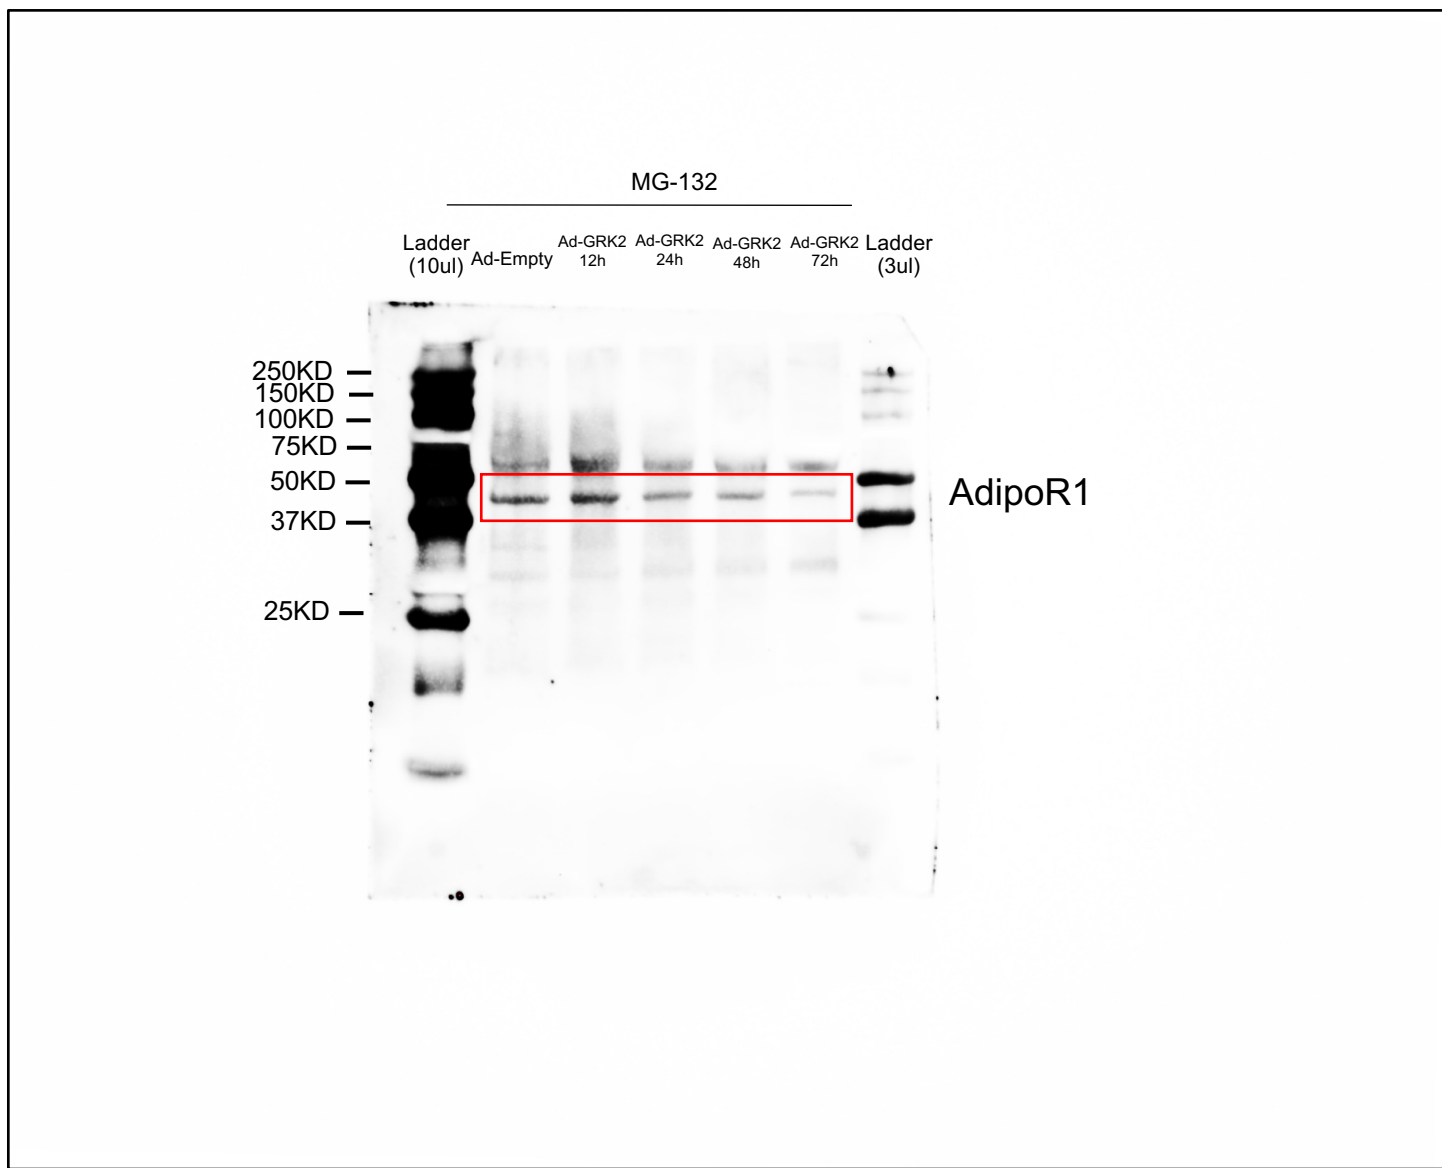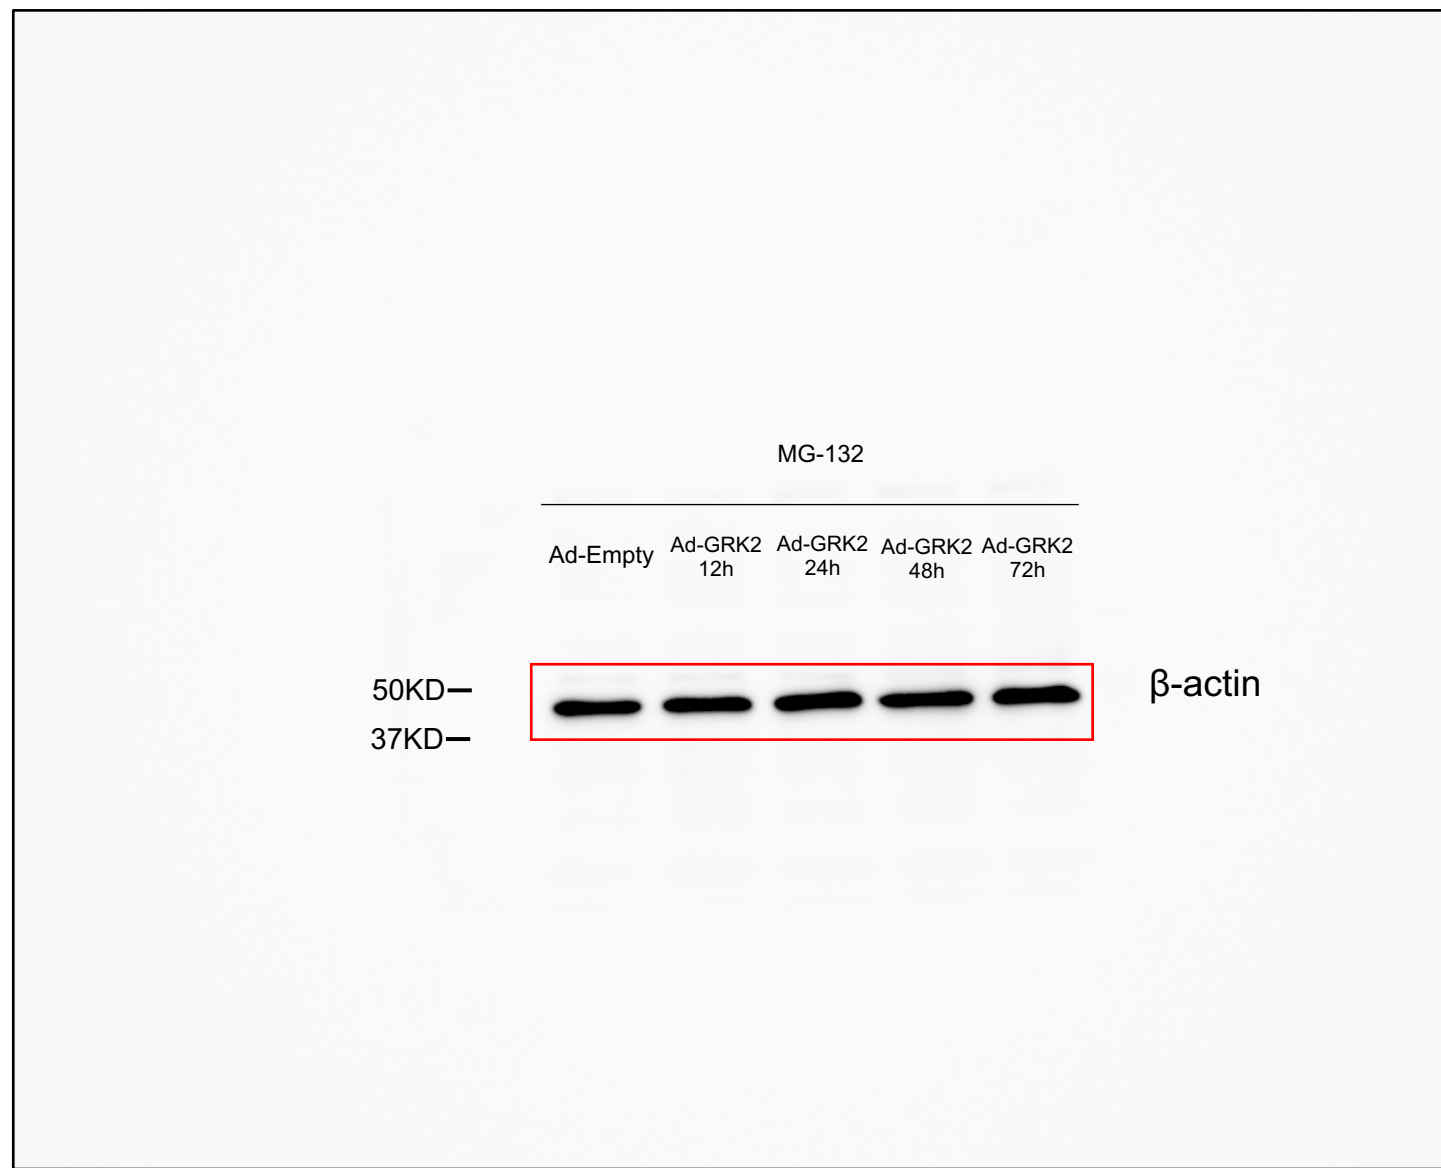

Chloroquine

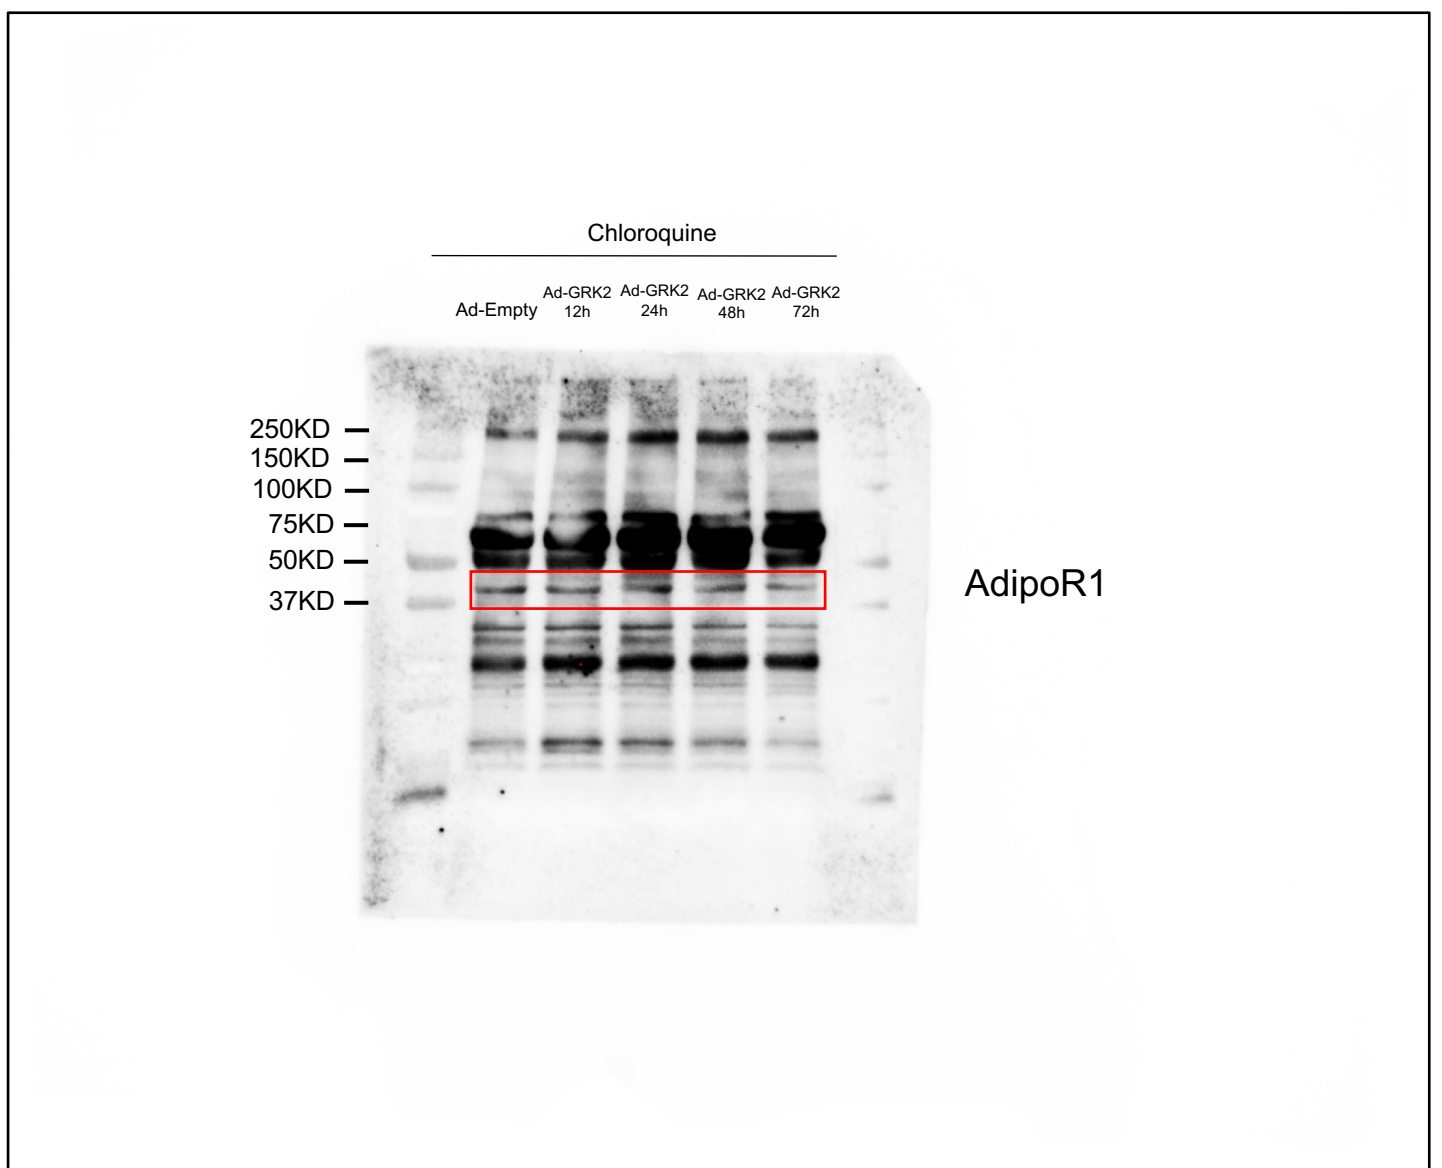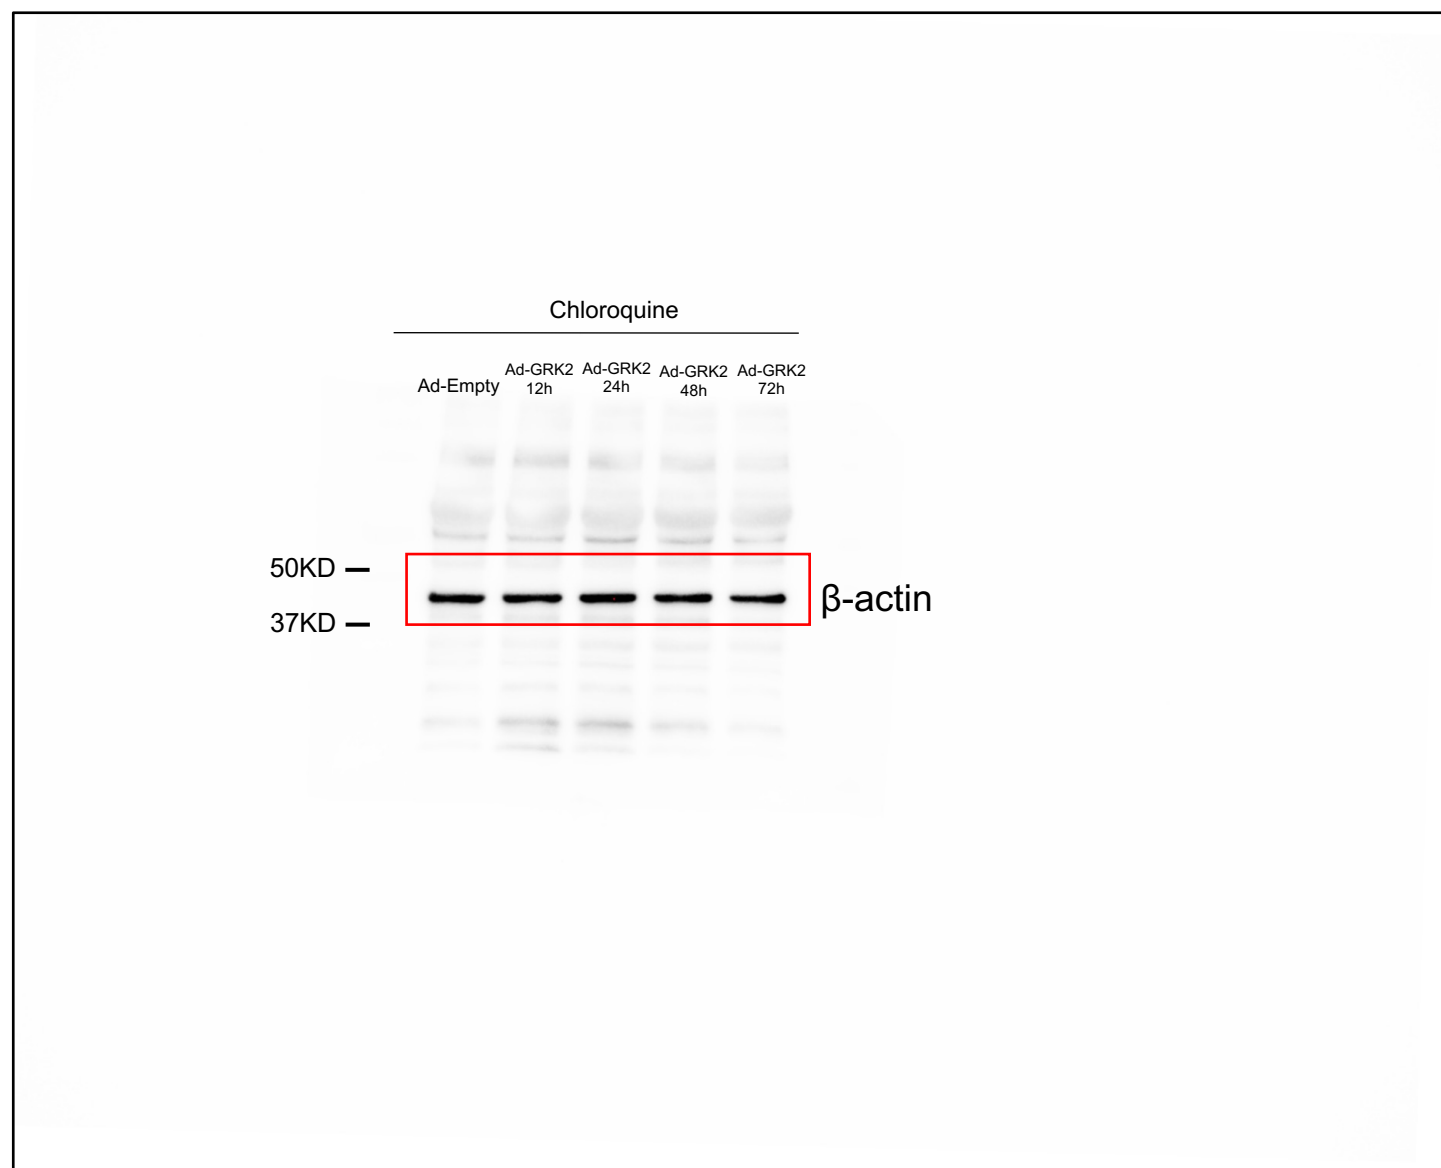

Figure 5C

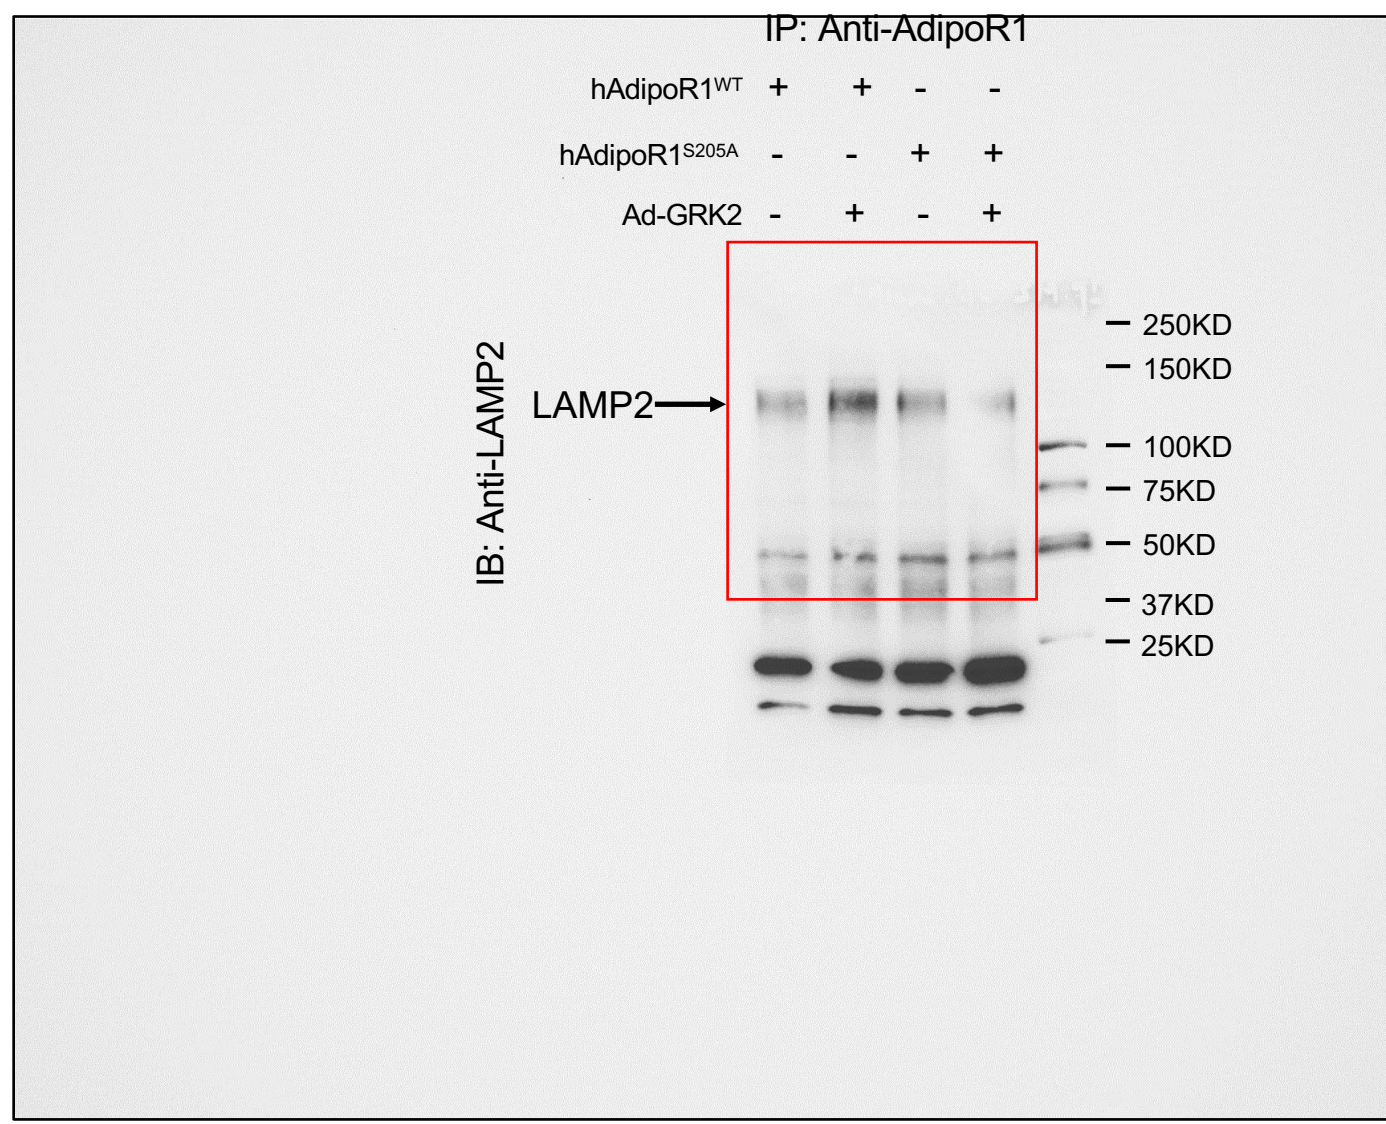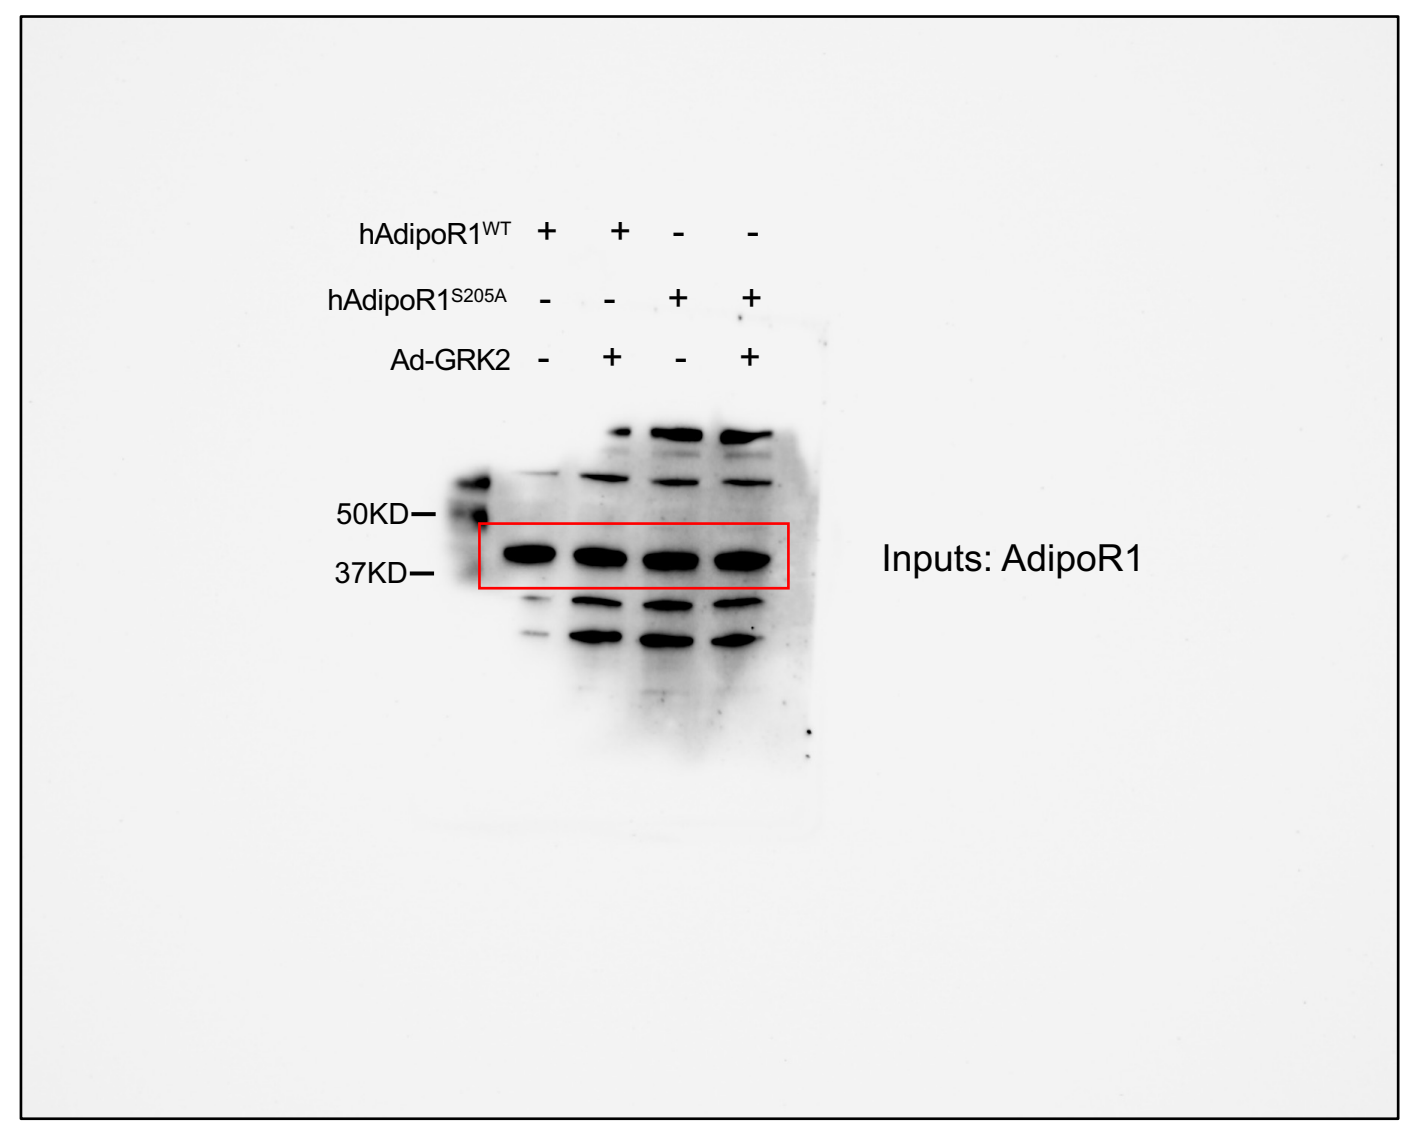

Figure 6C

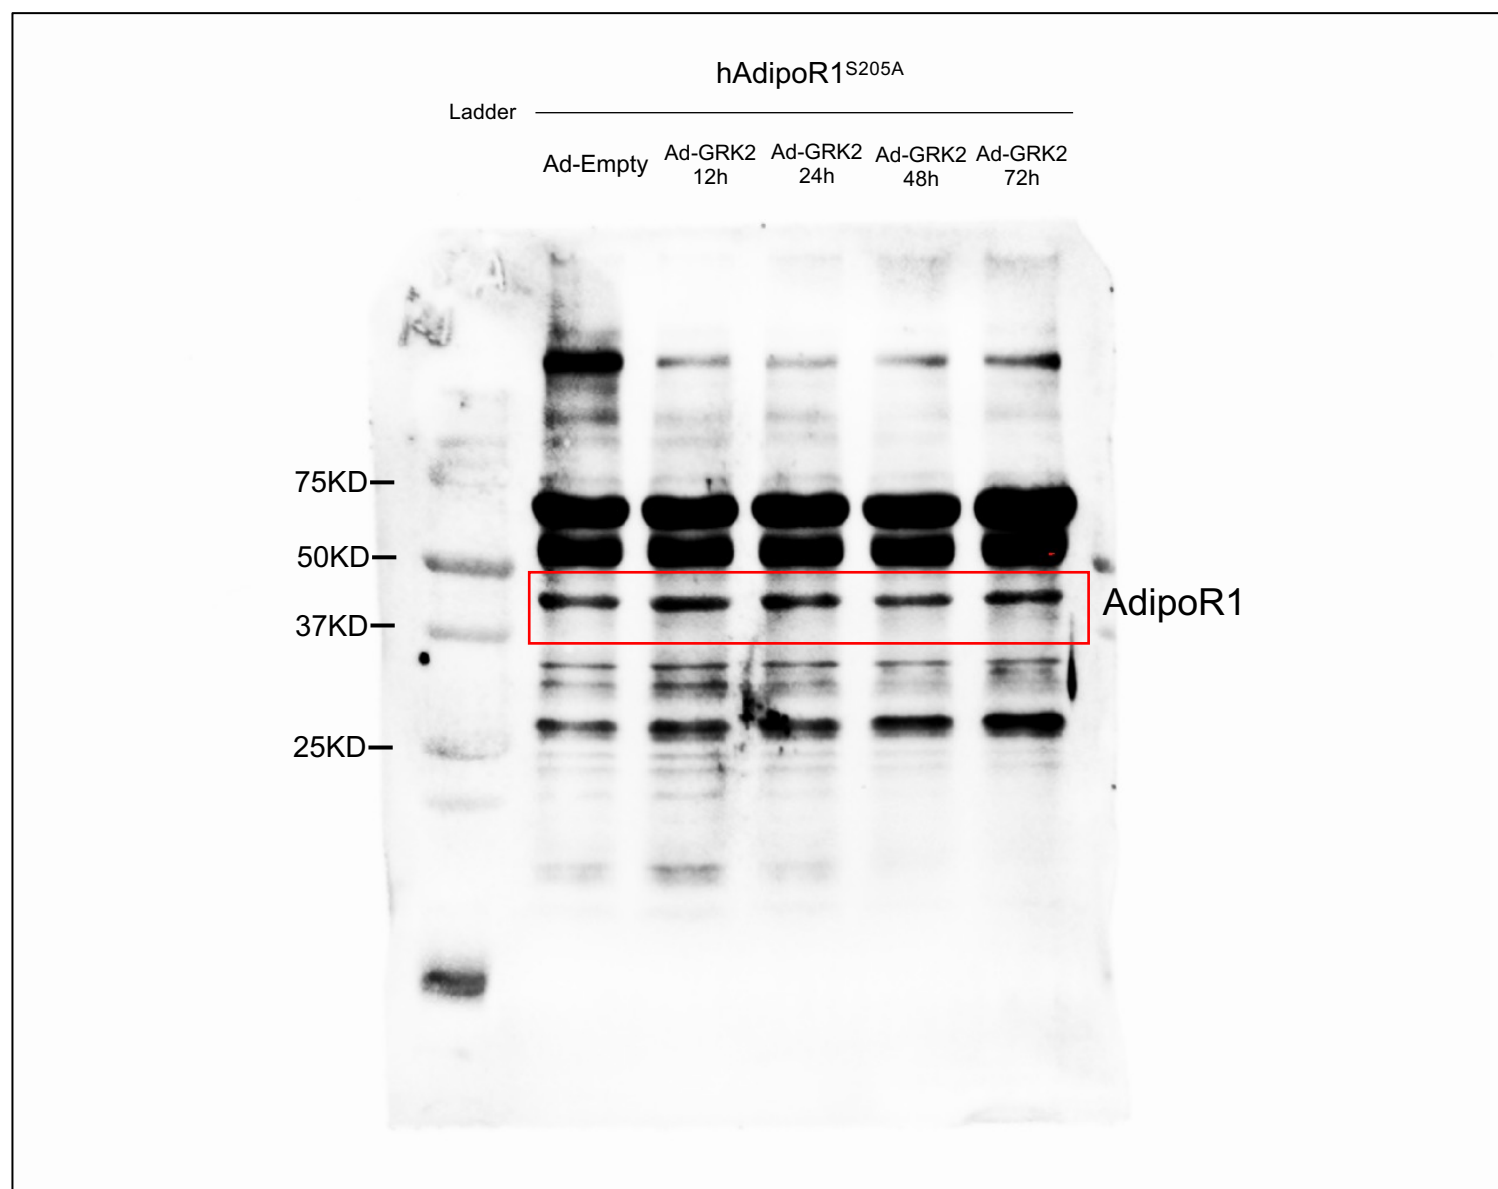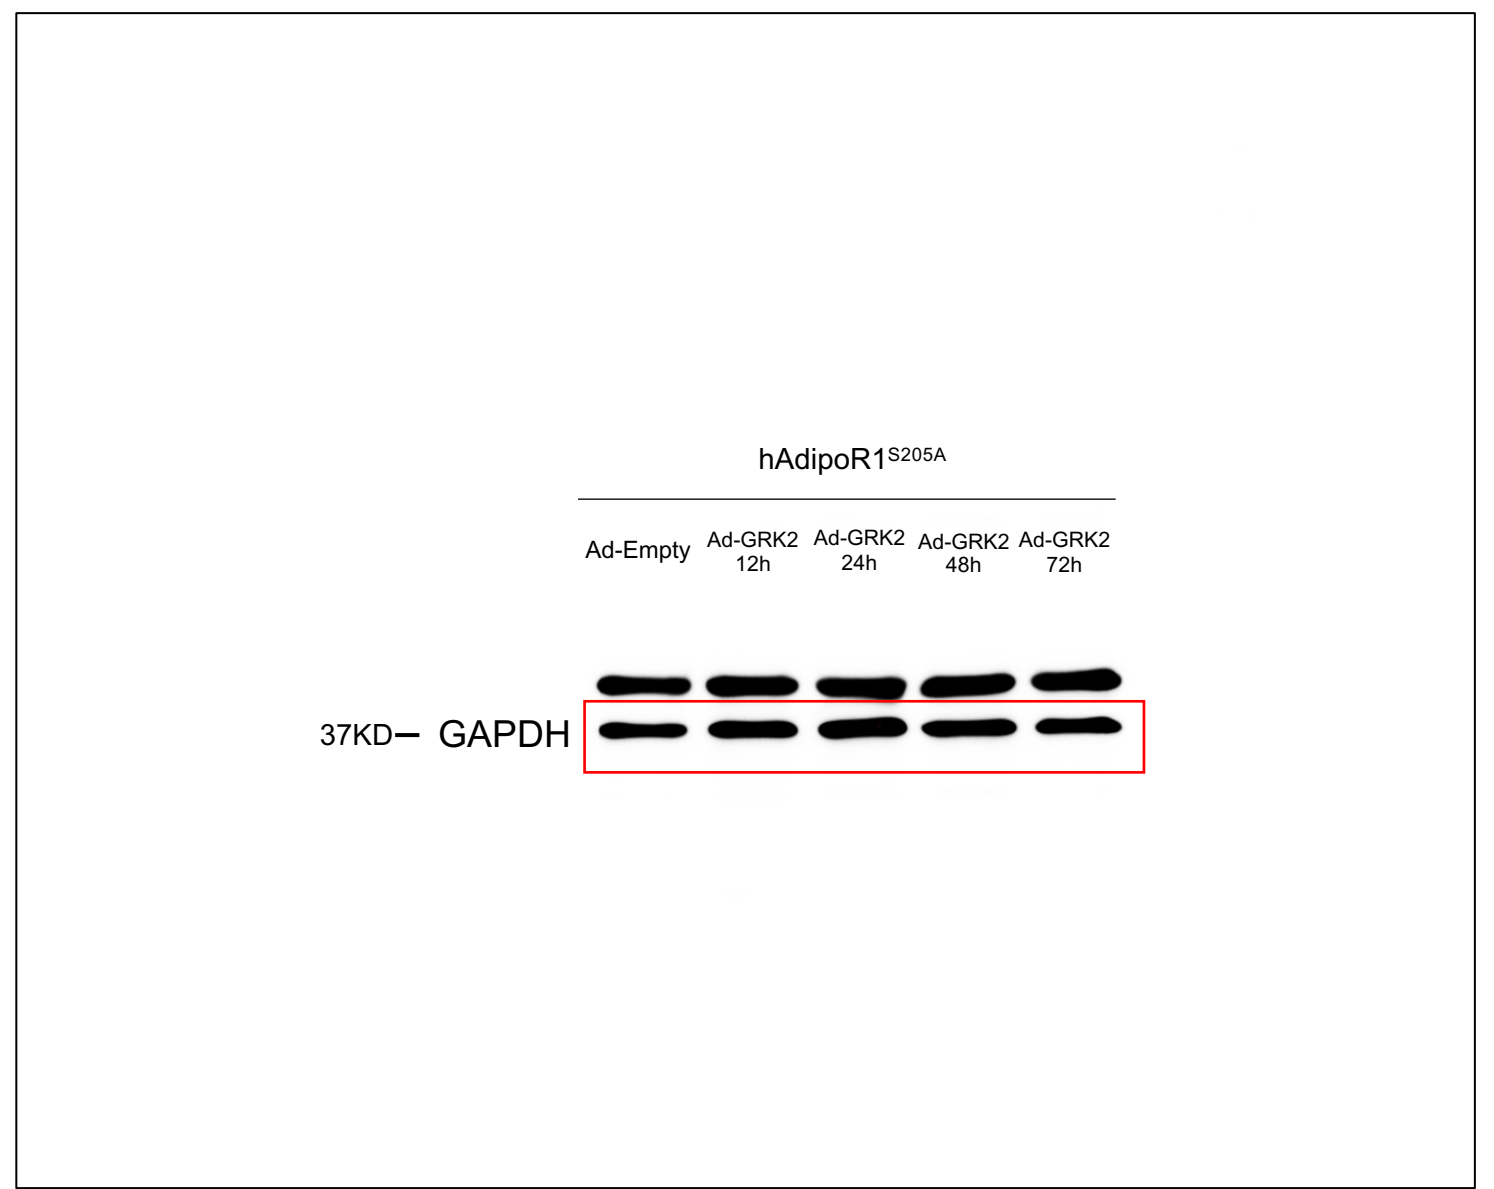

Figure 6D

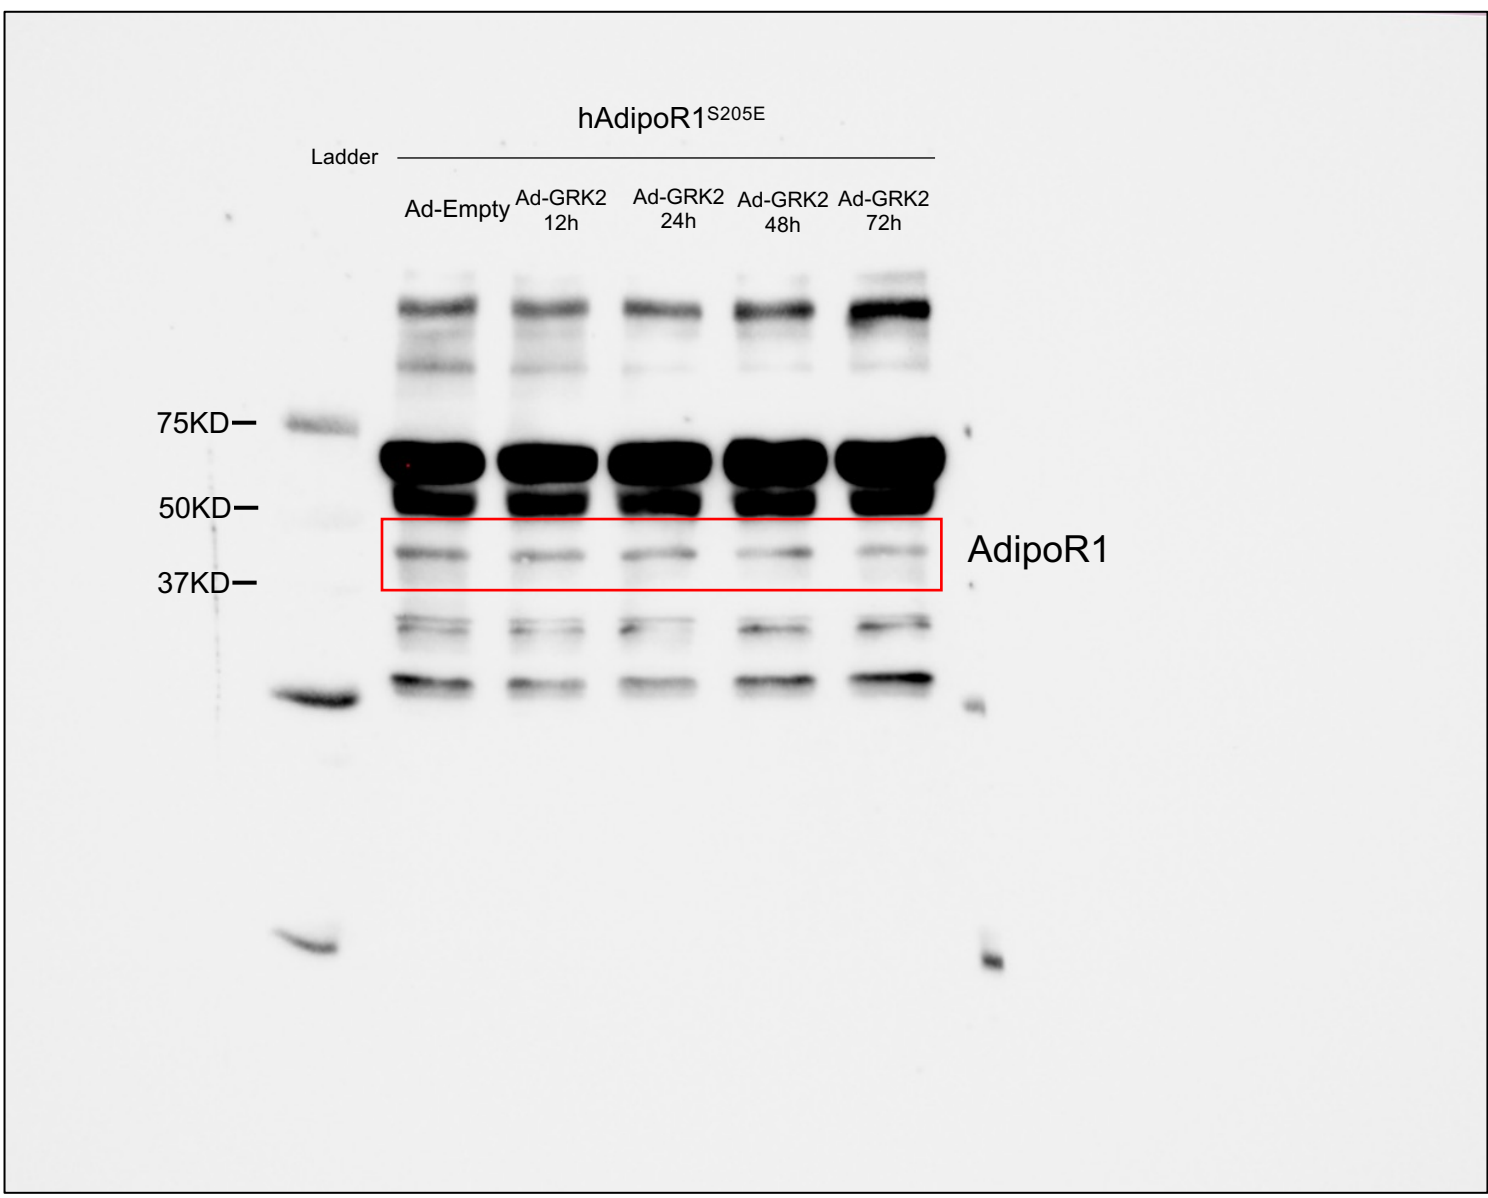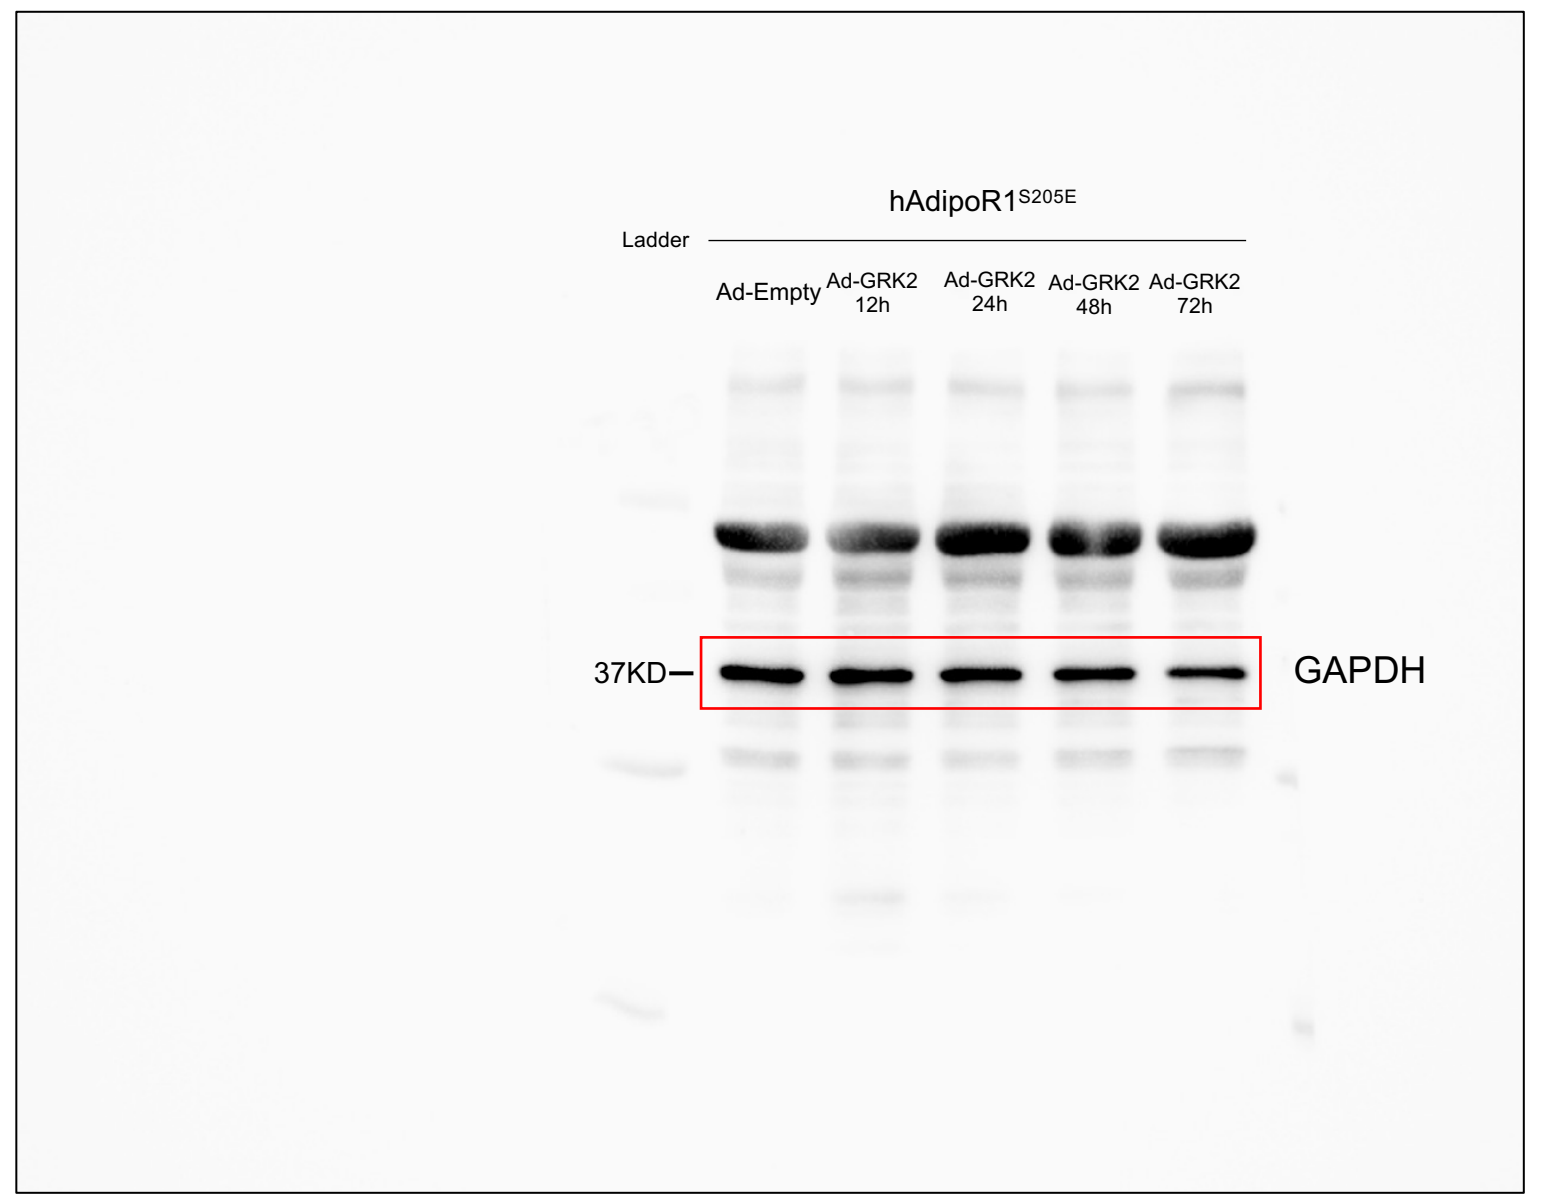

Figure 6E



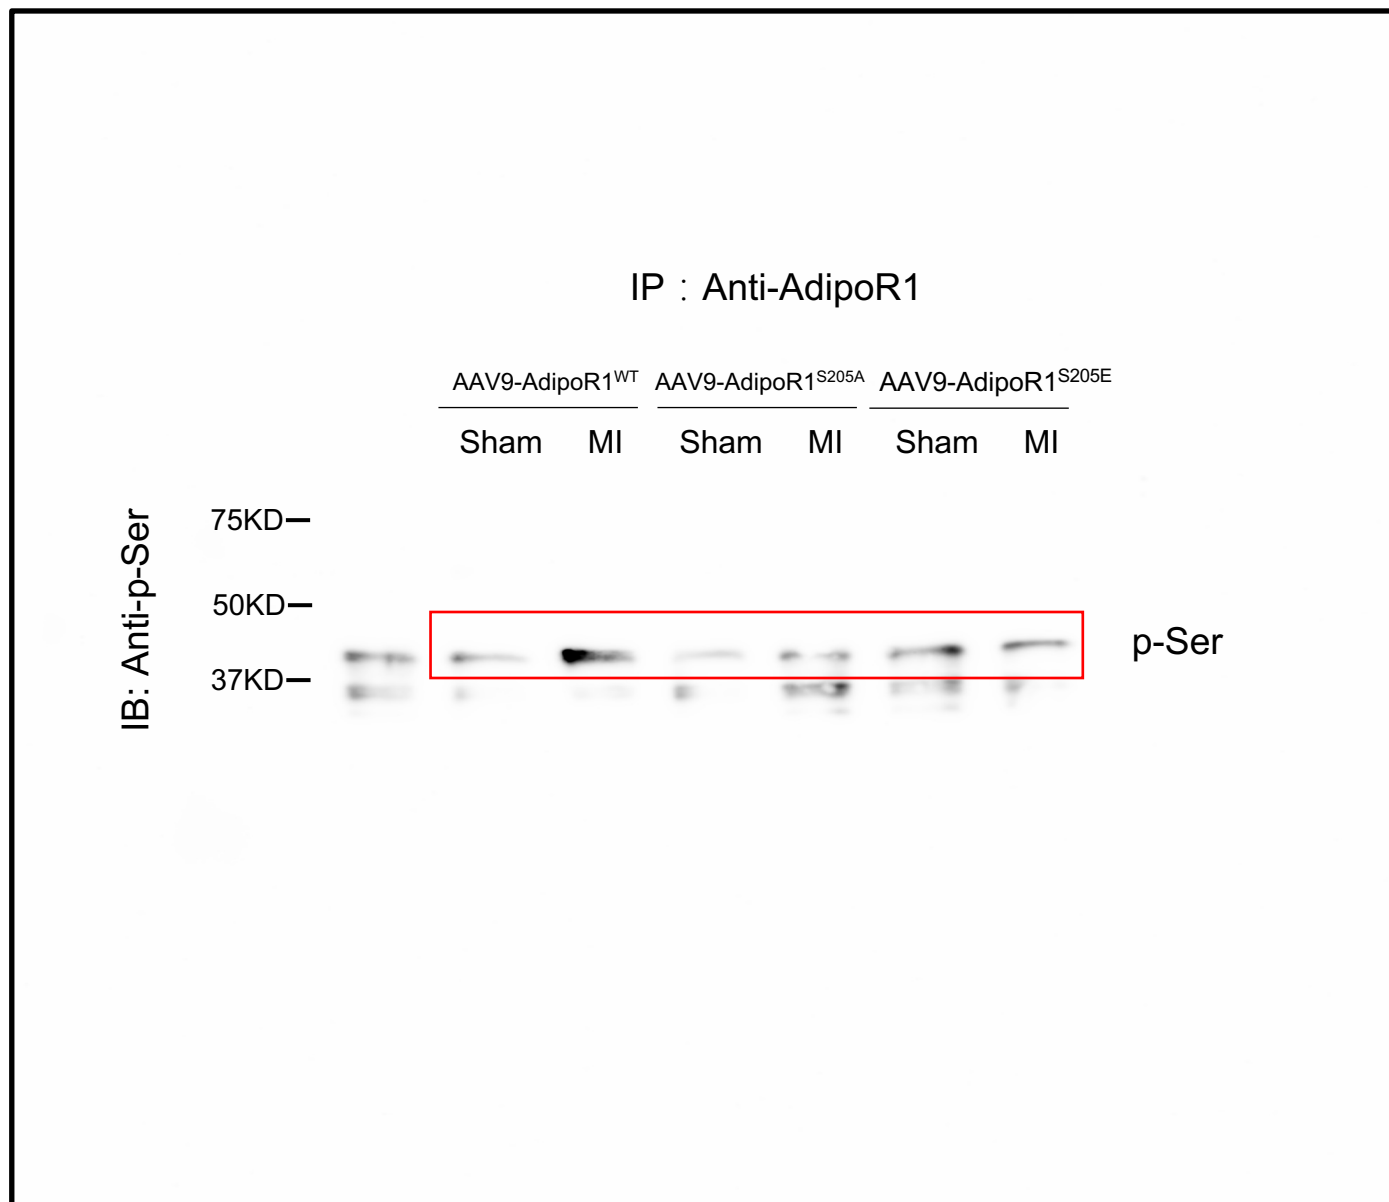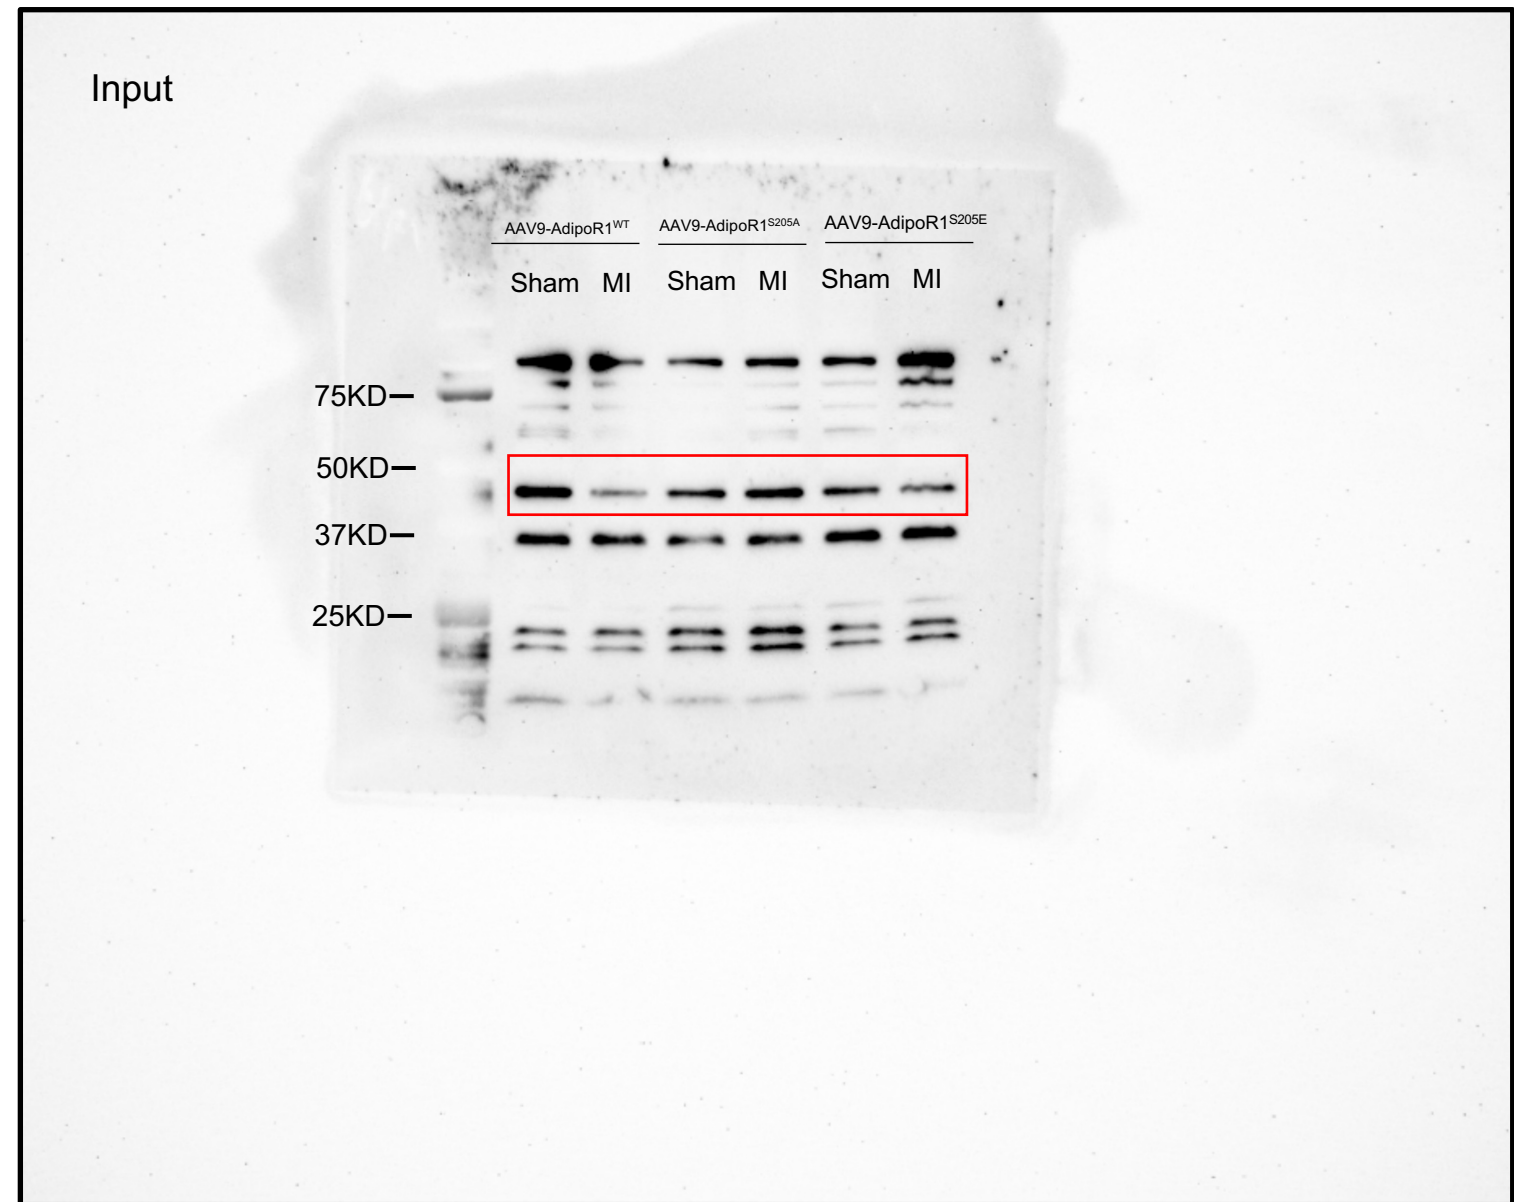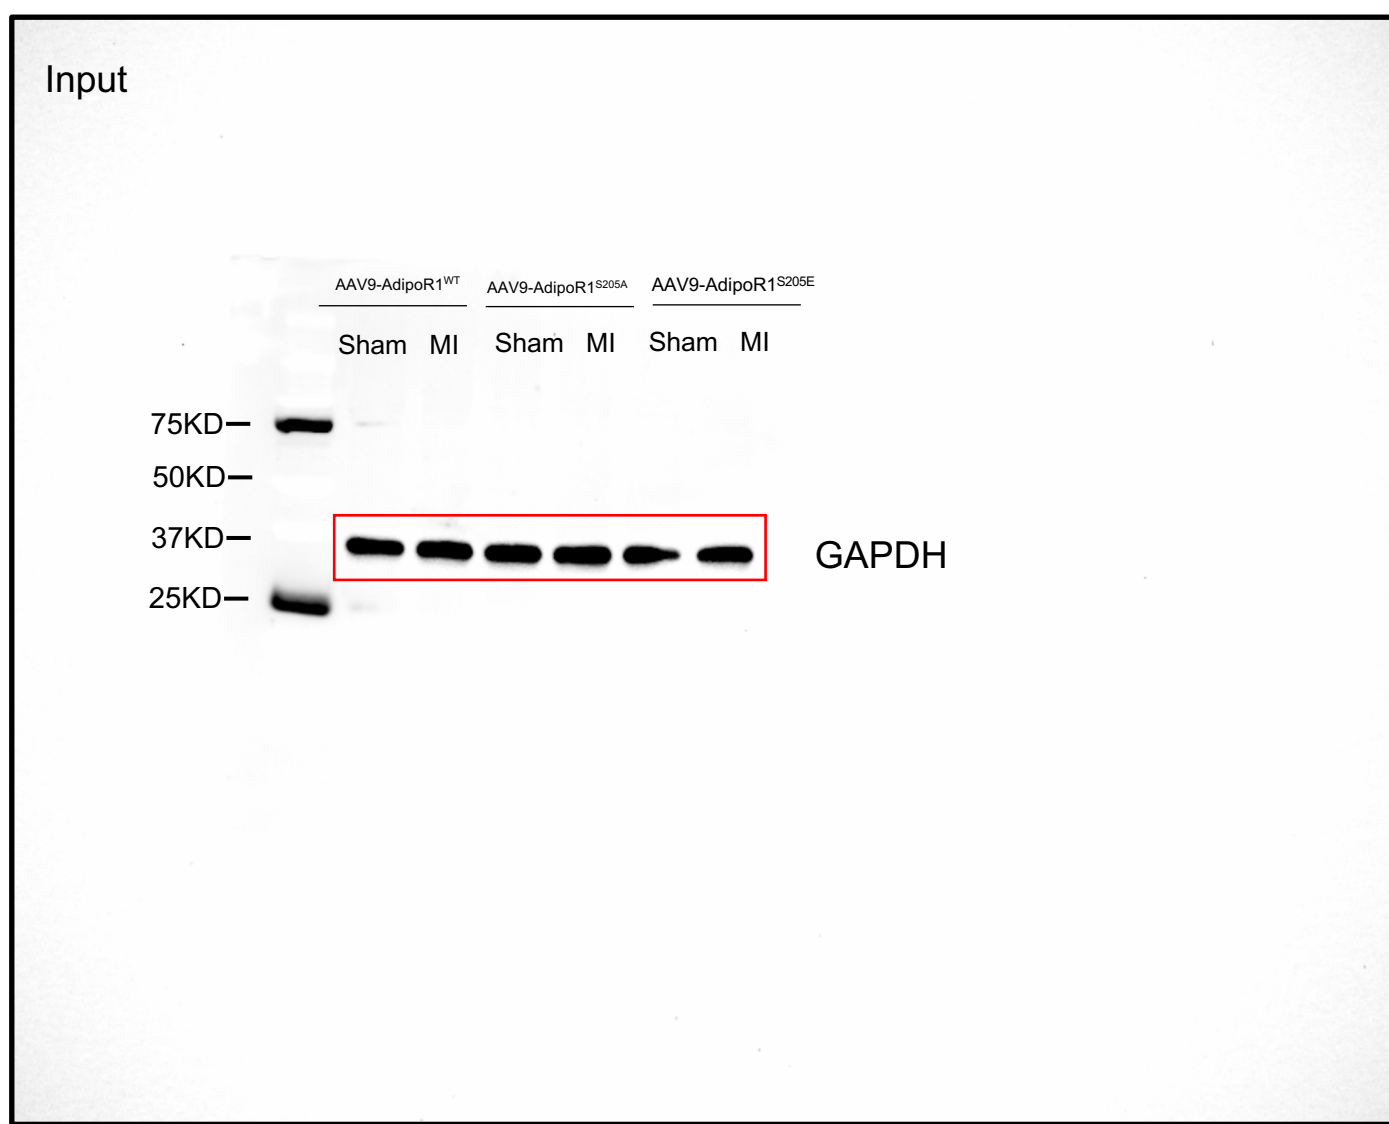

Figure 8E

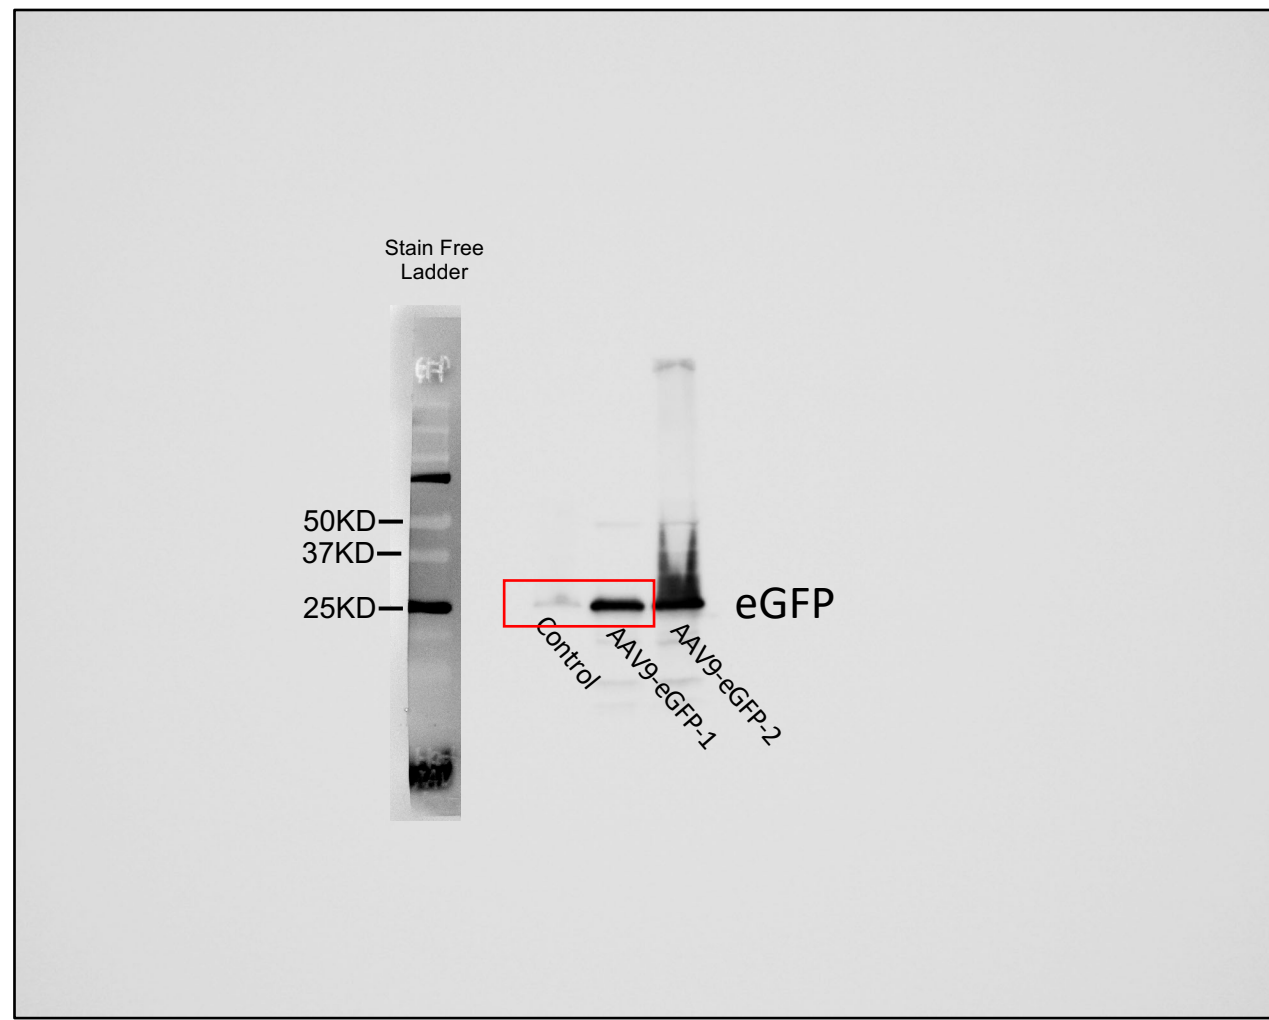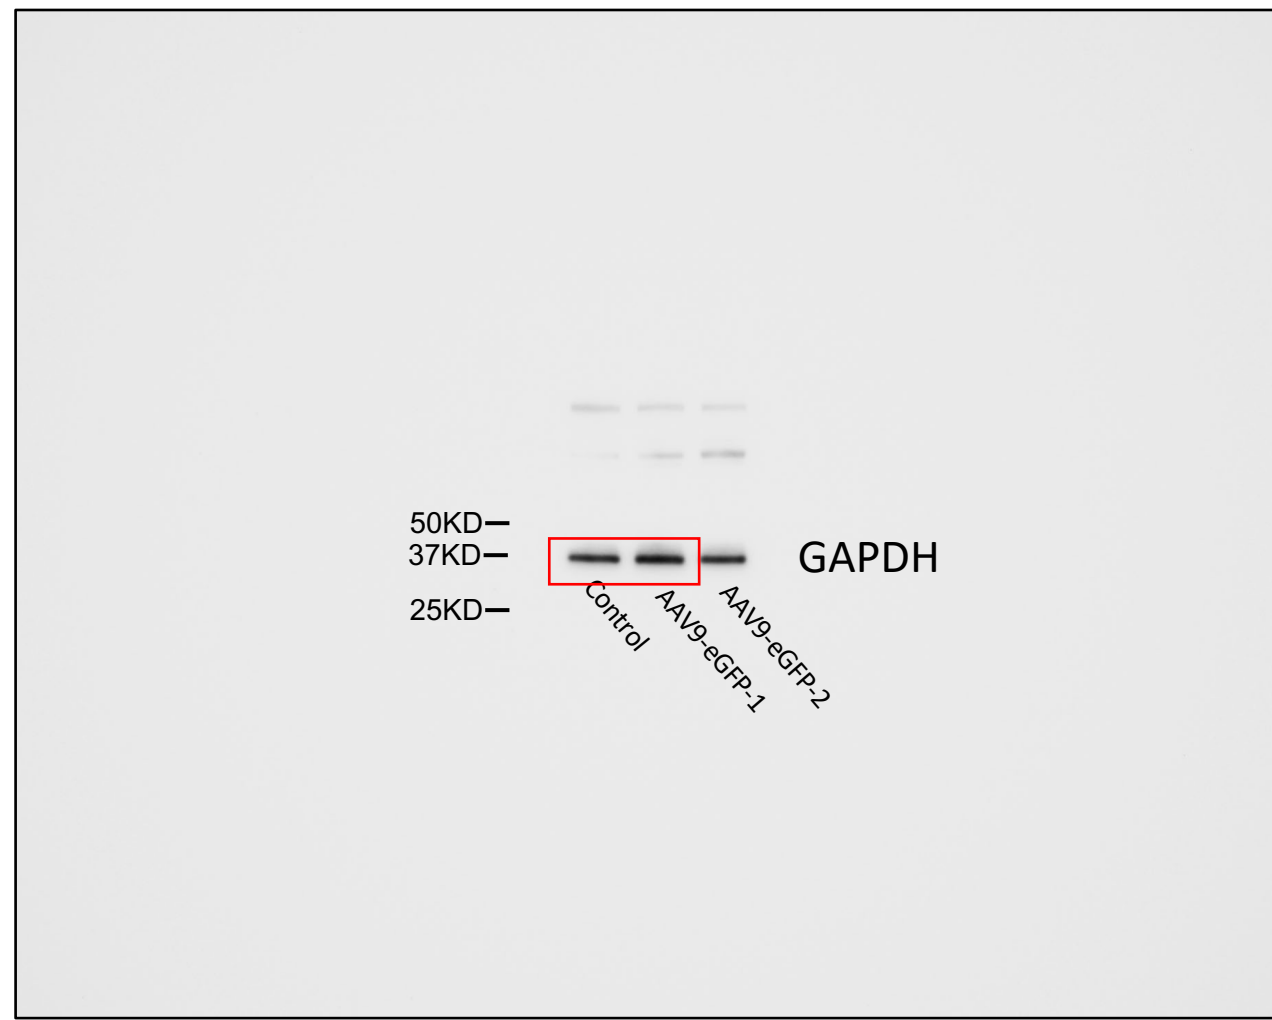

Figure S1B

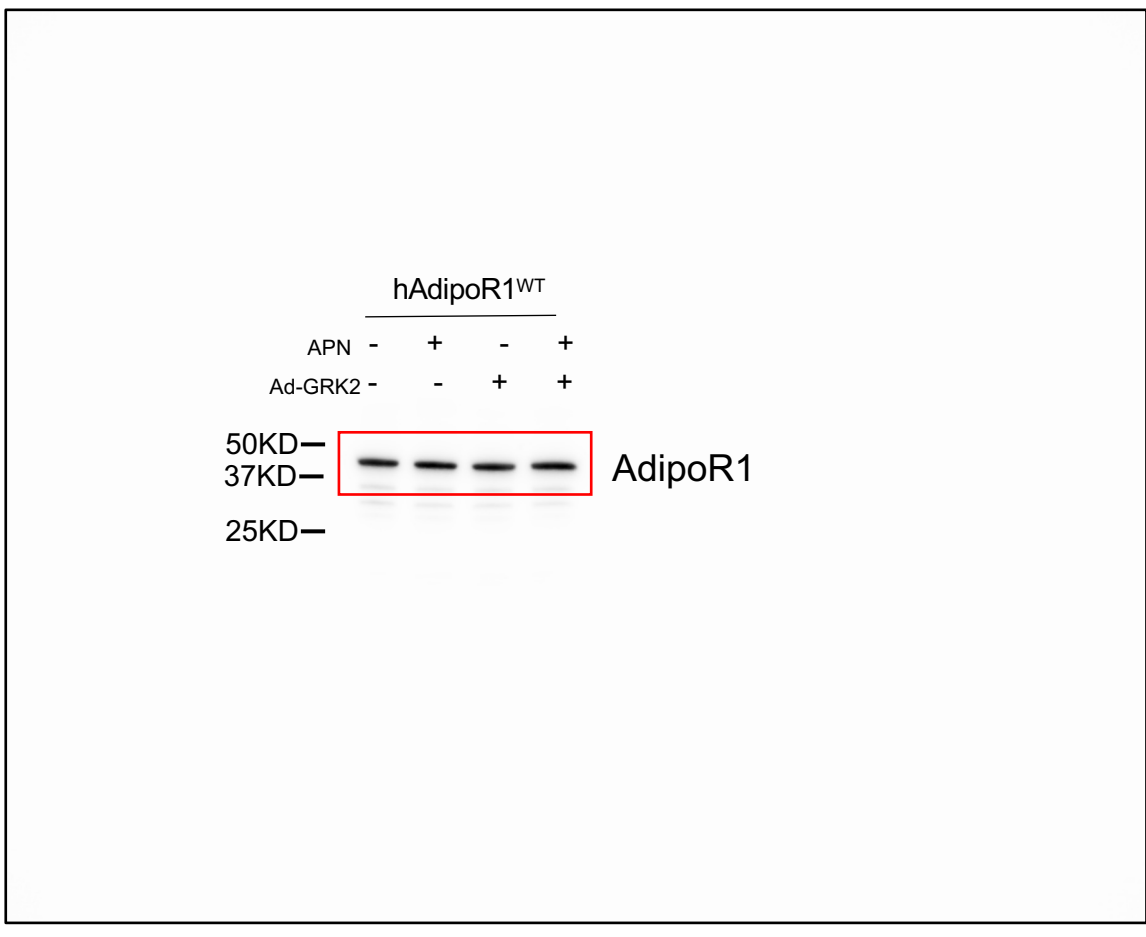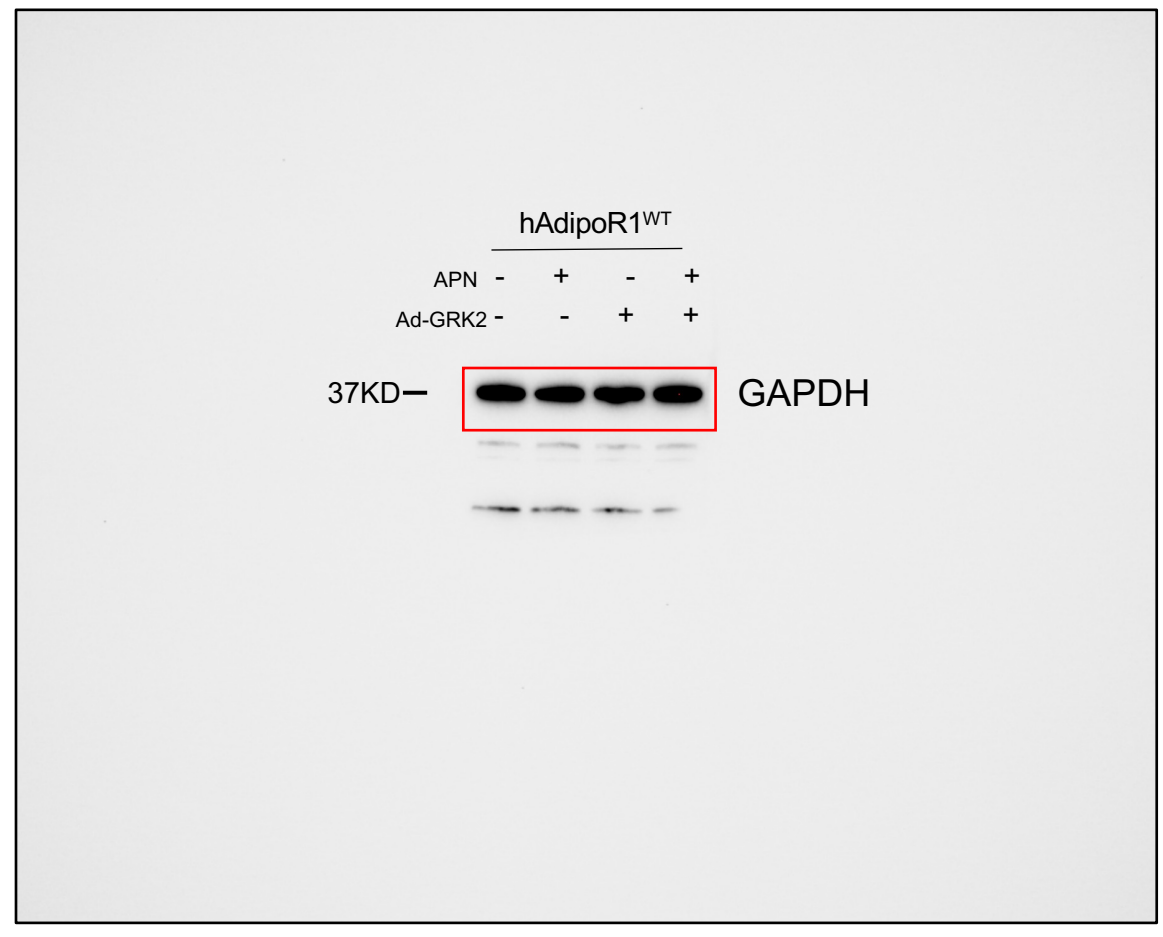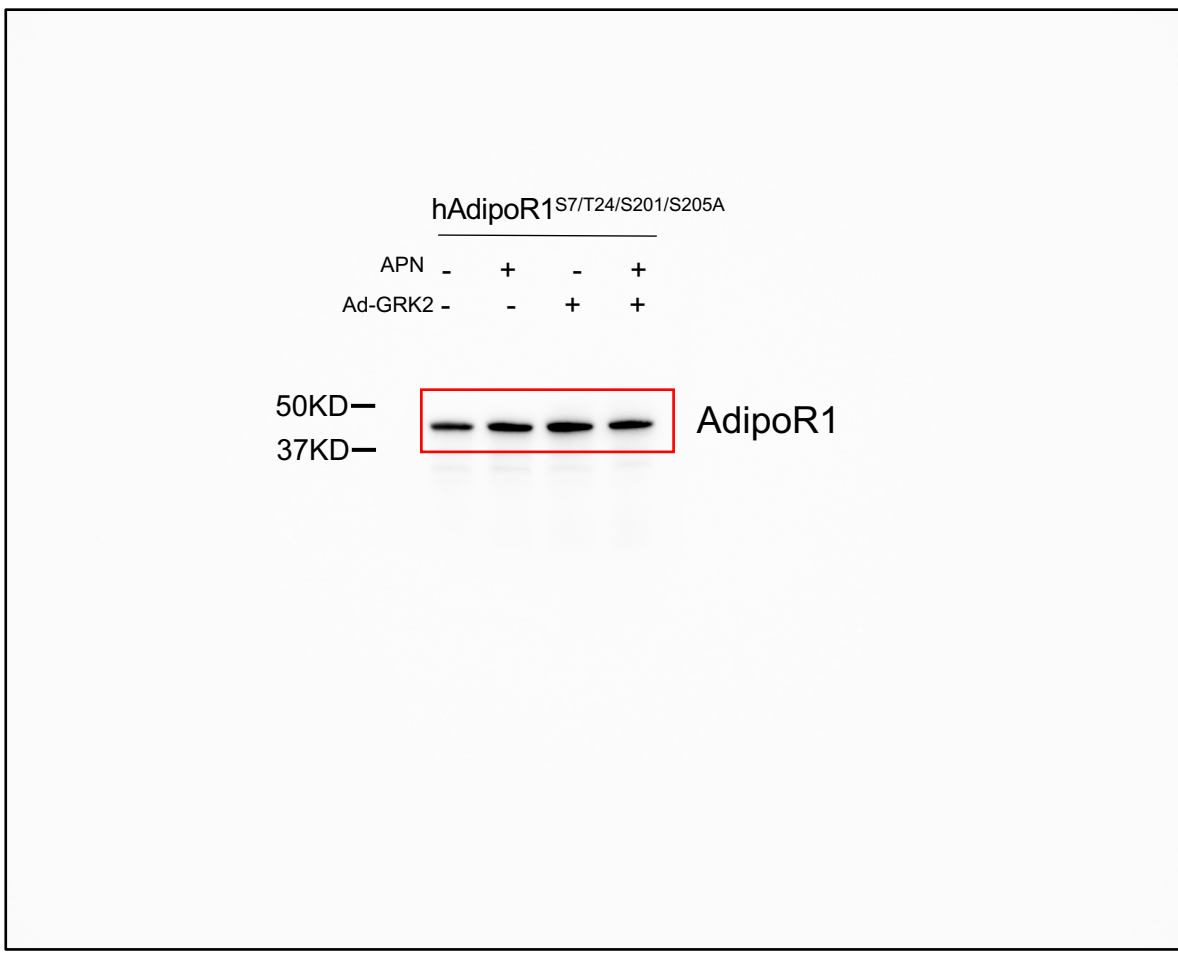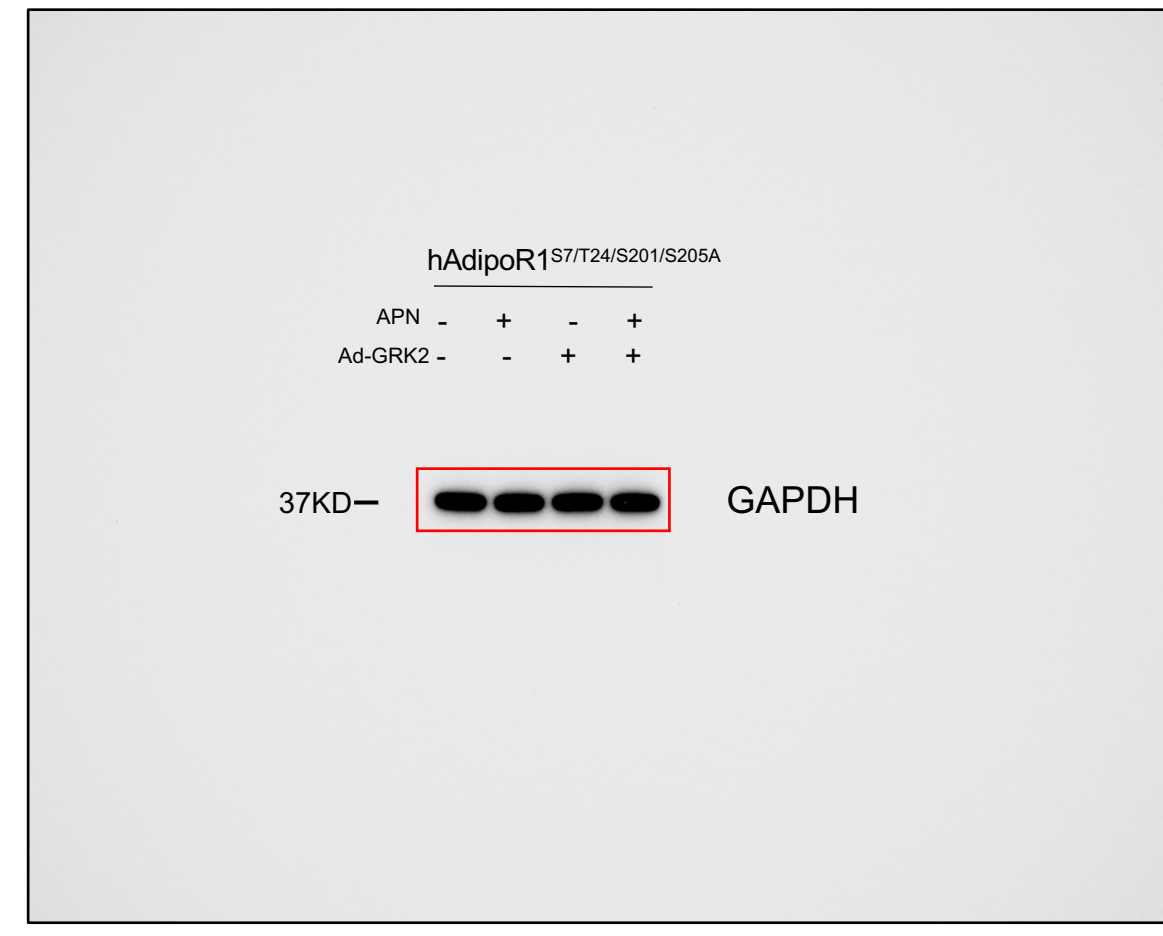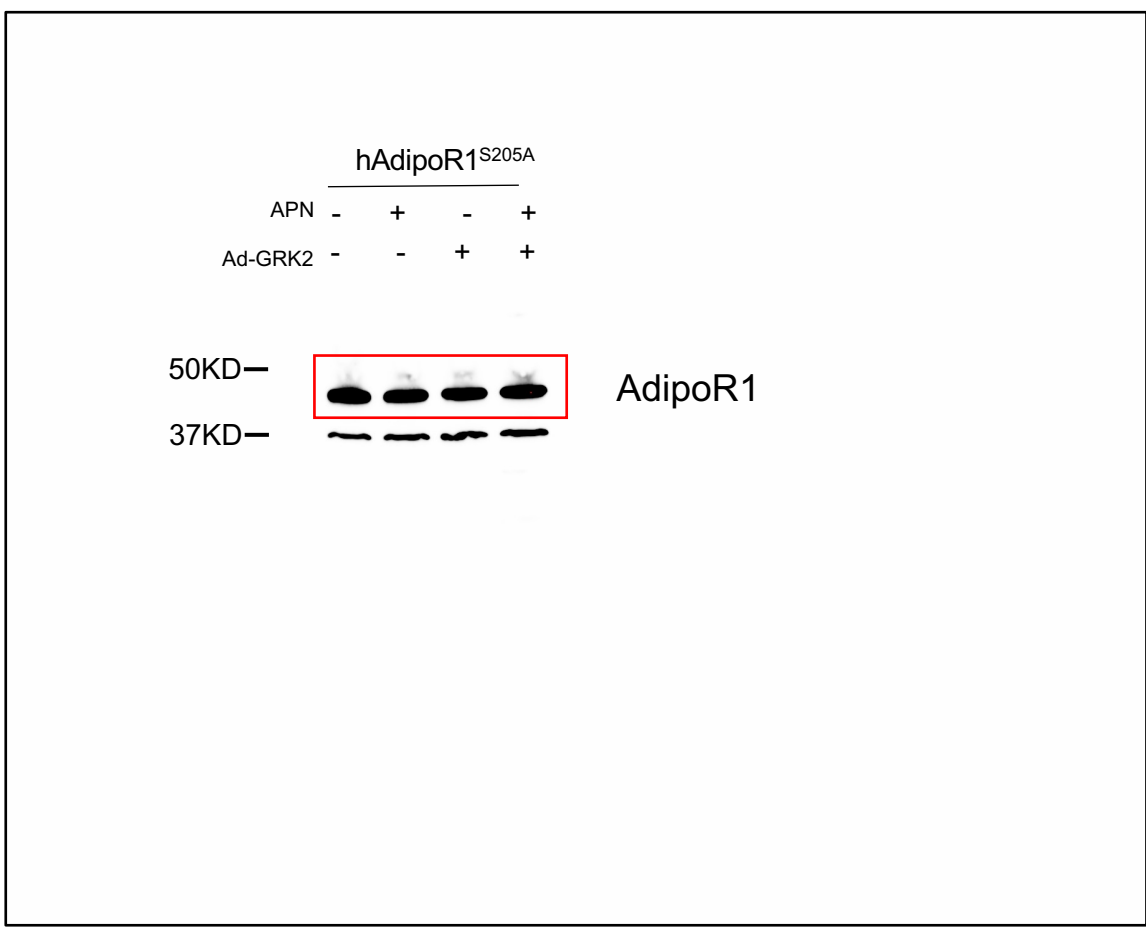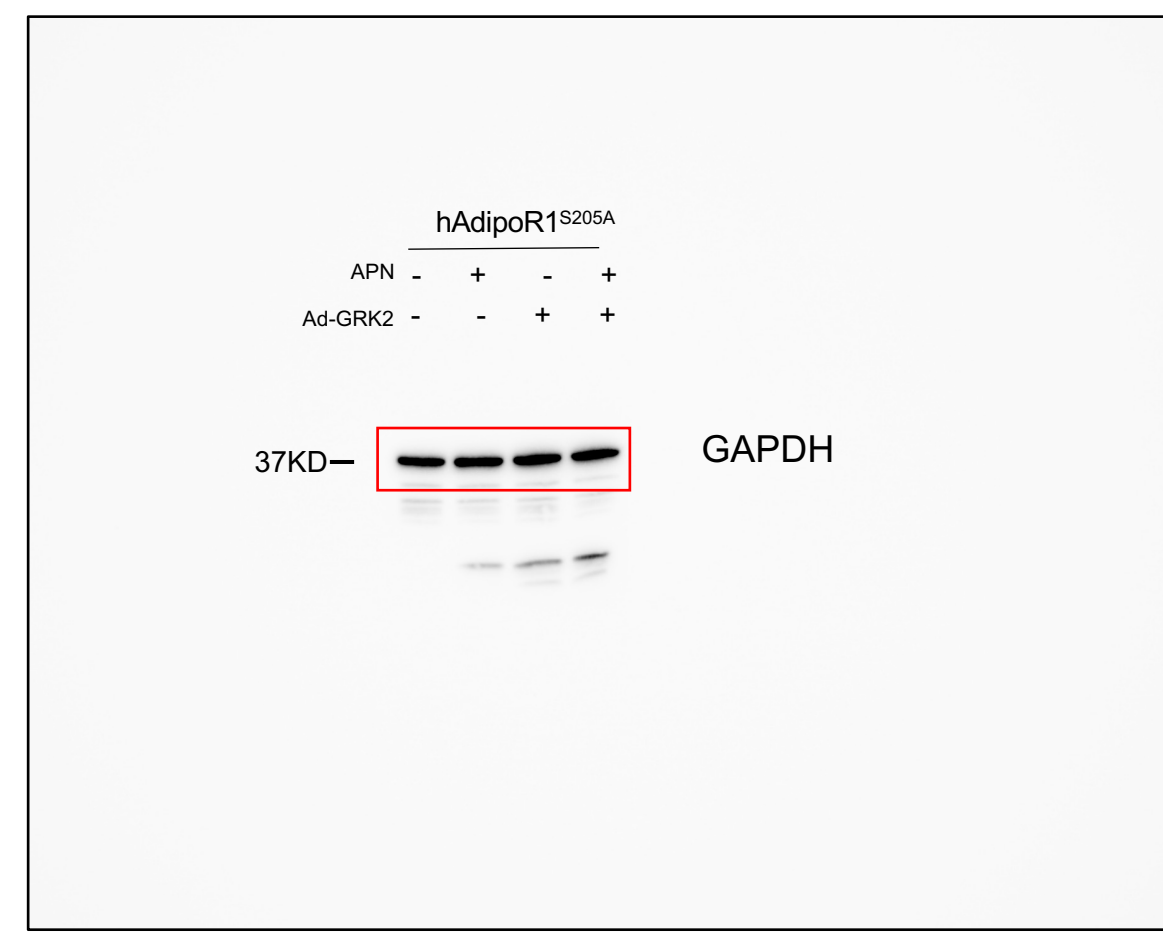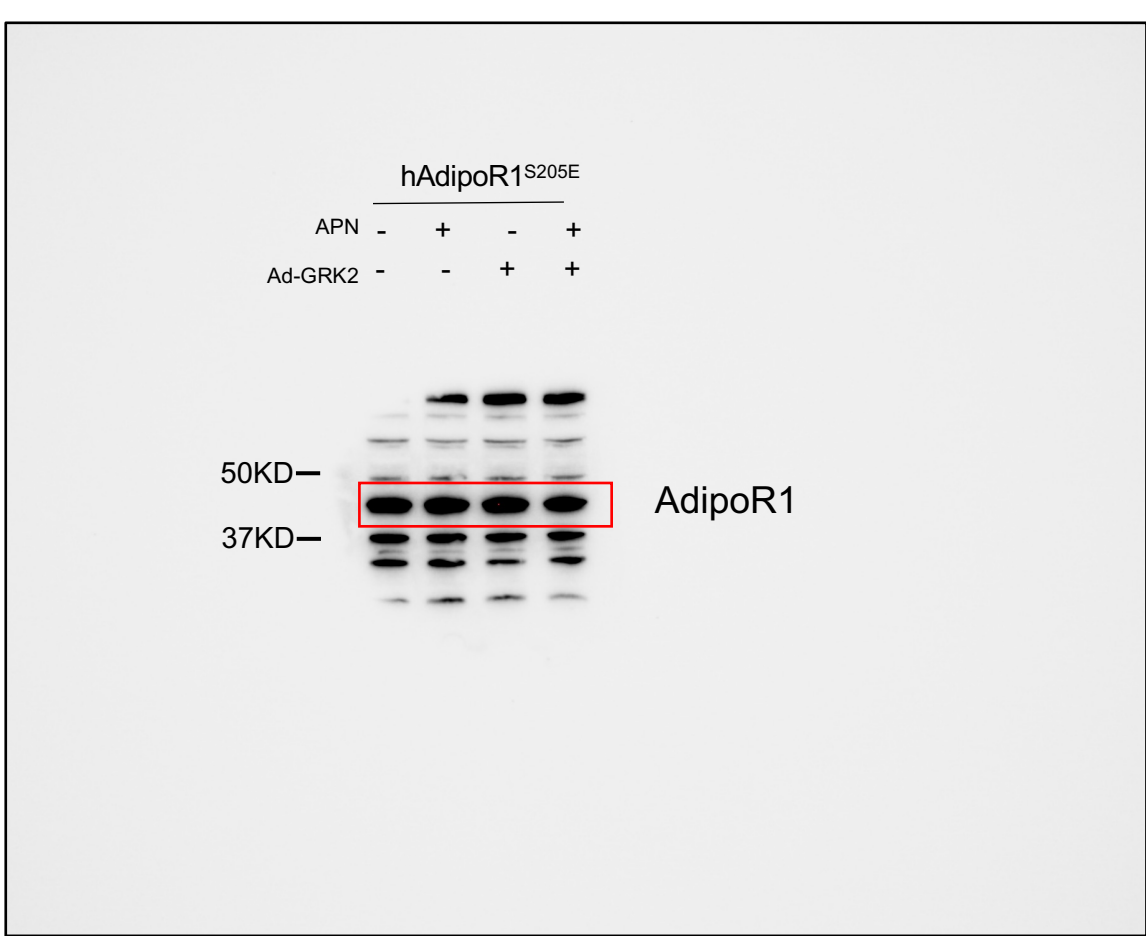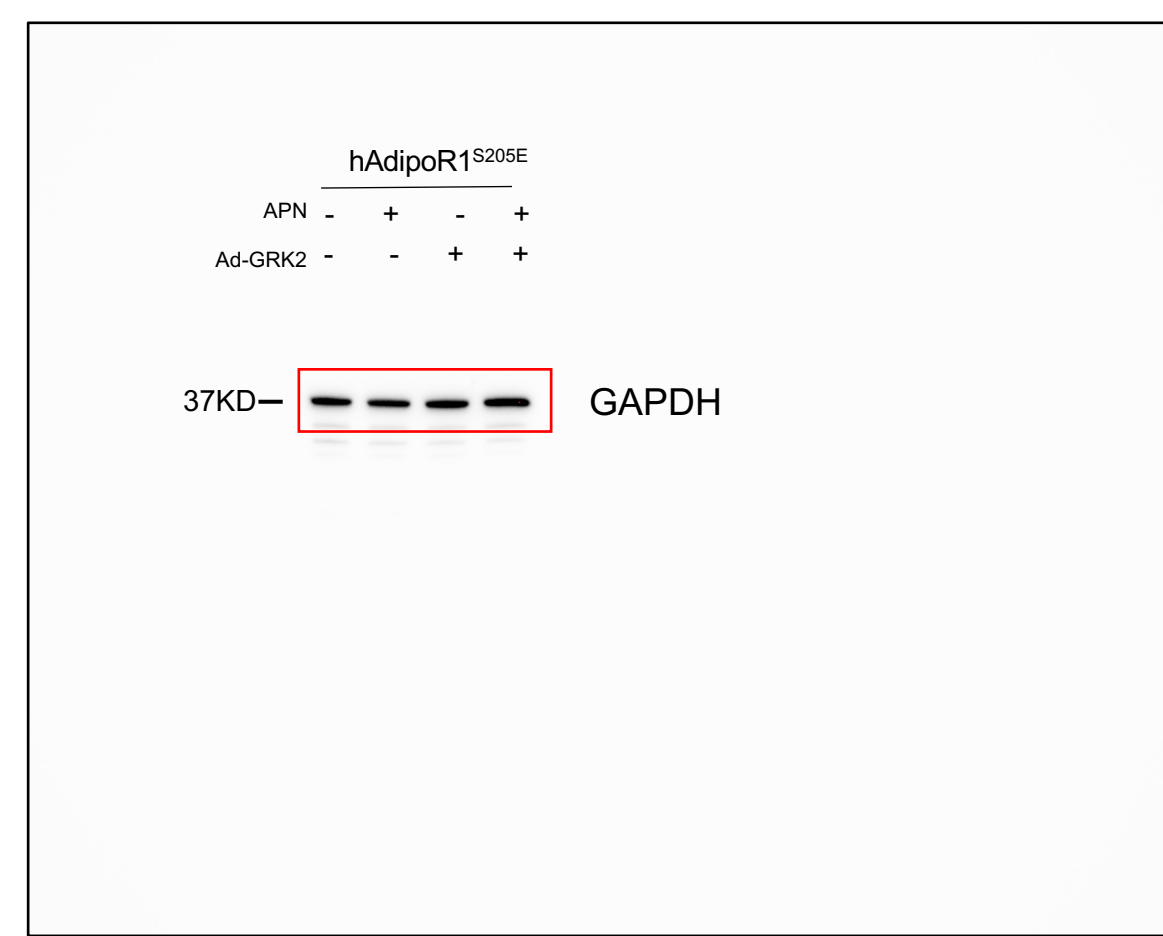

Figure S2

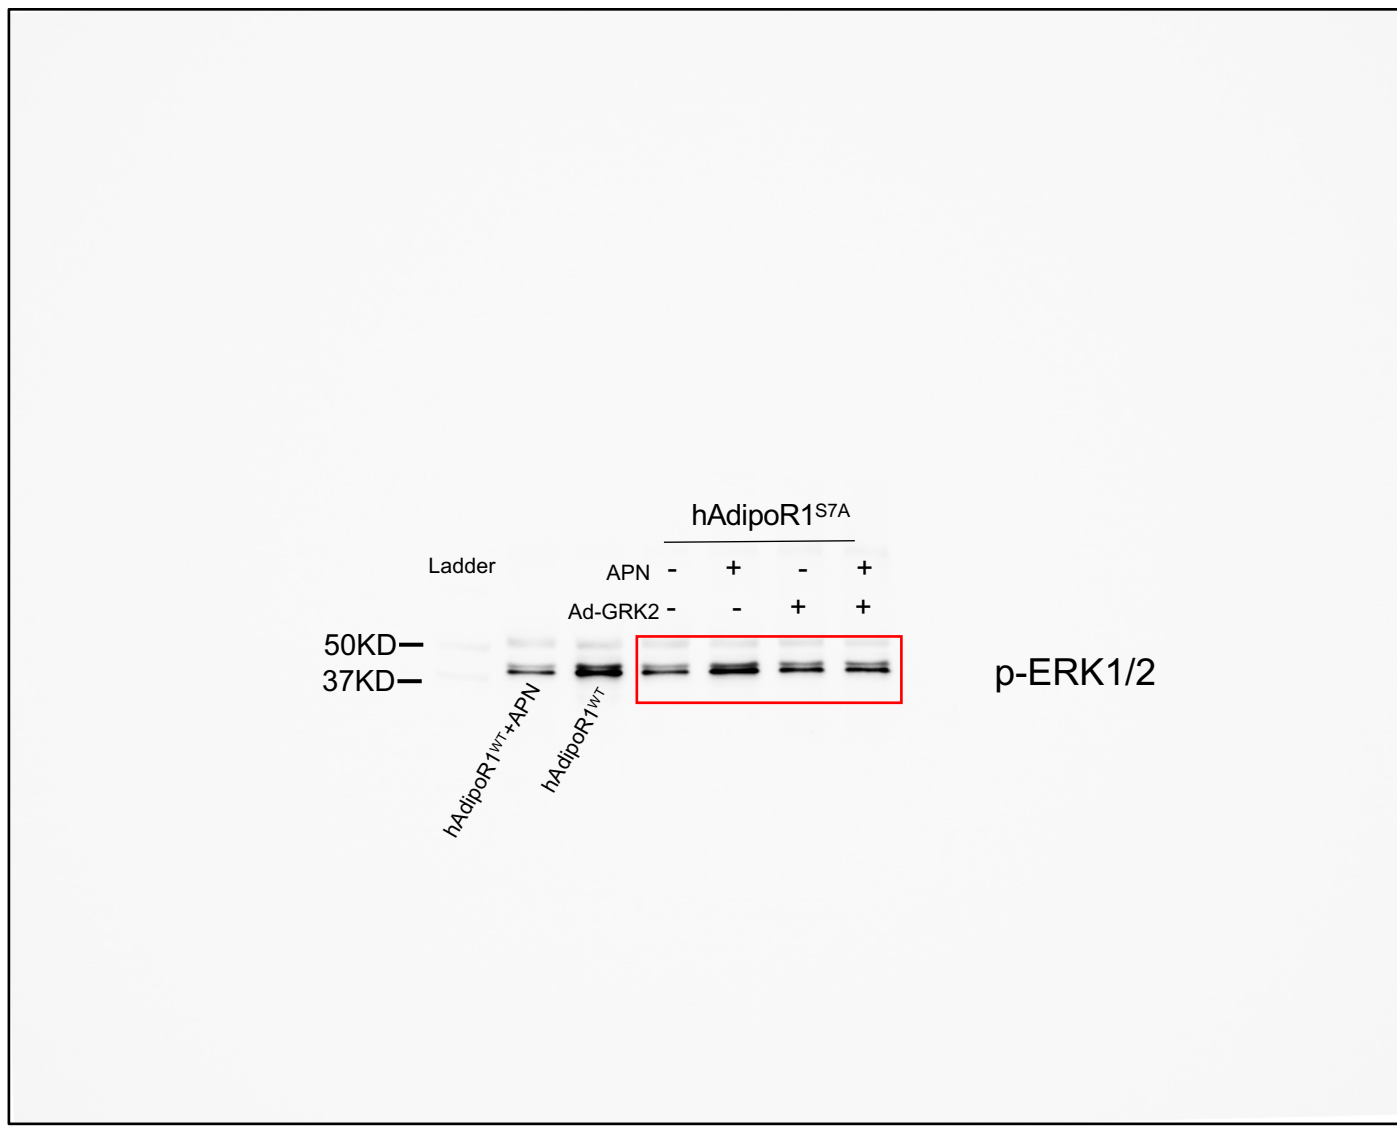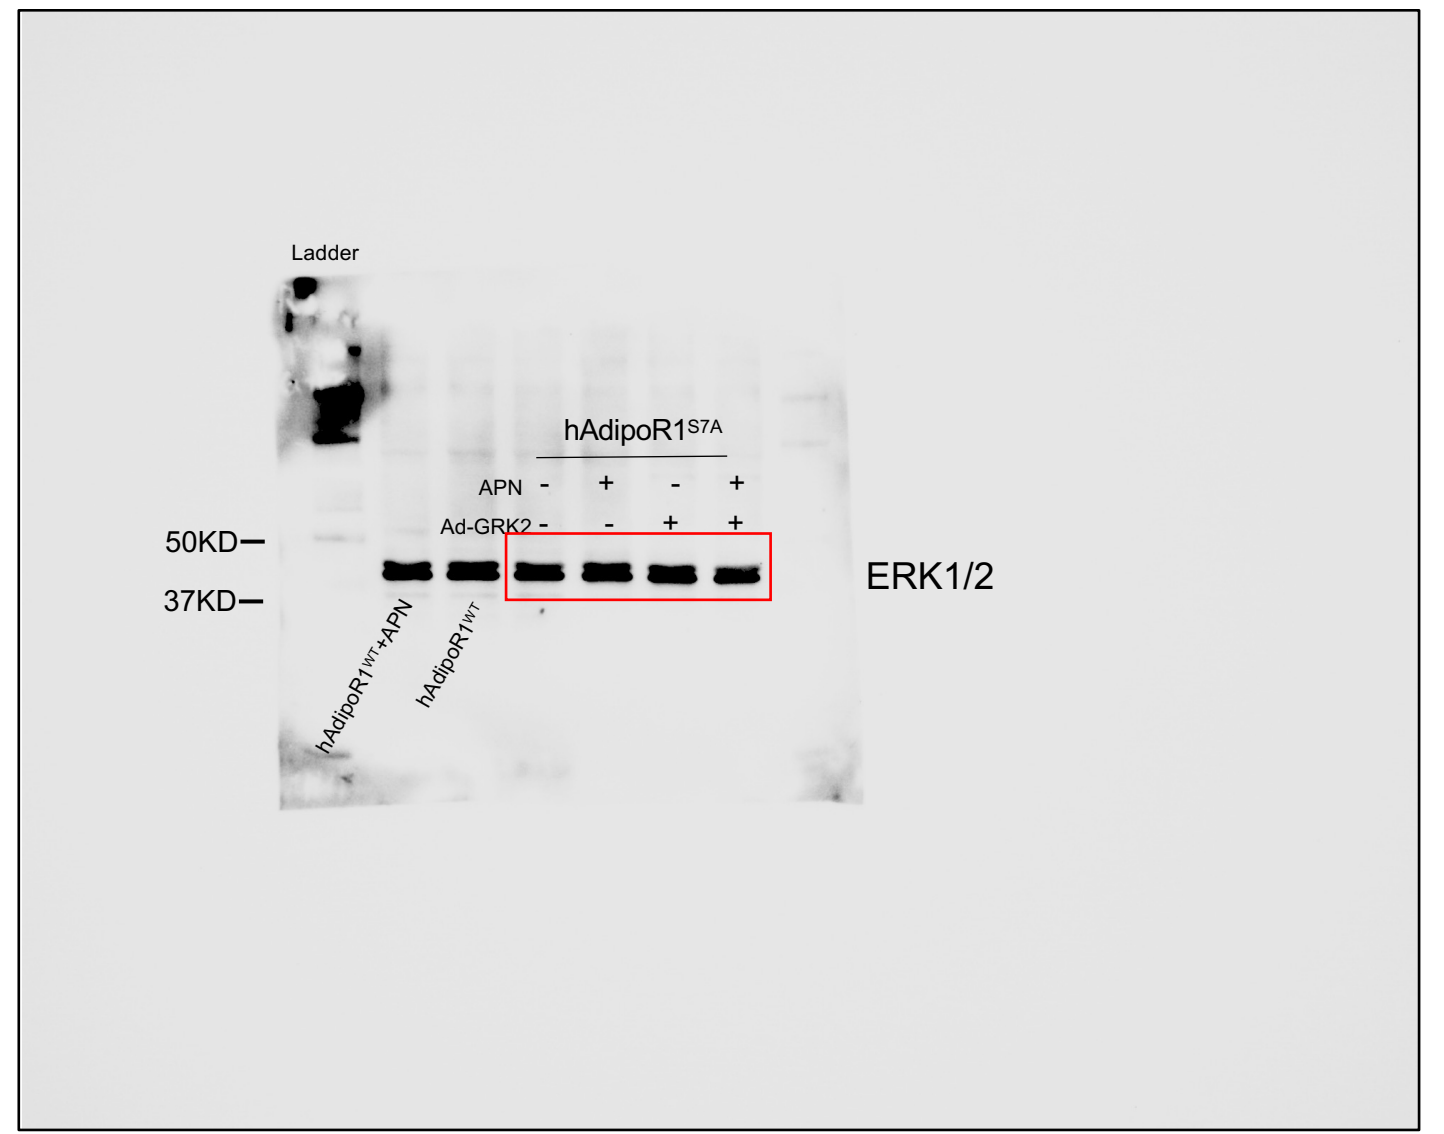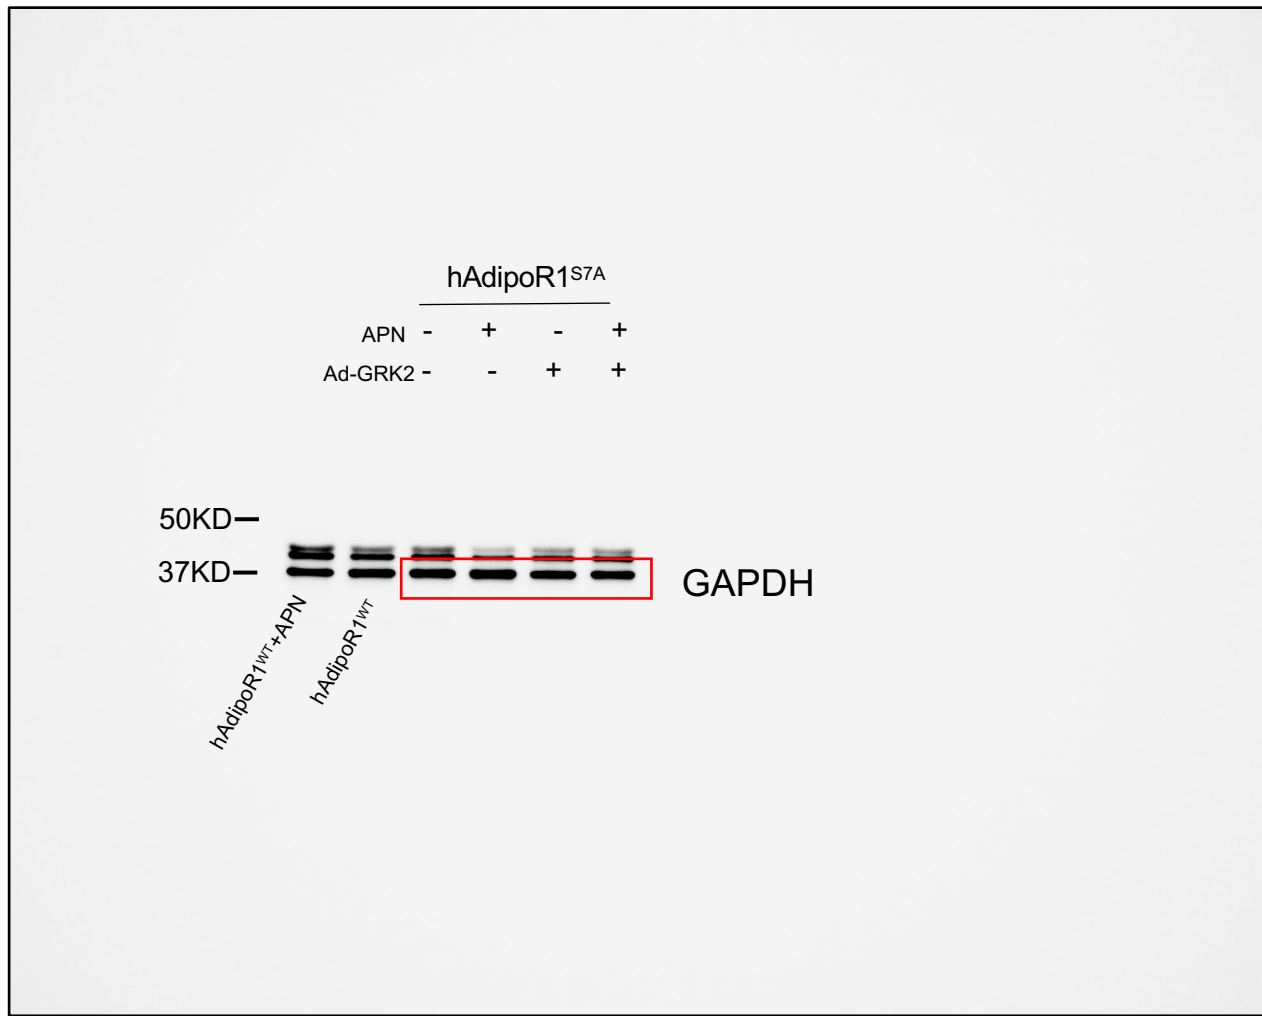

Figure S3A

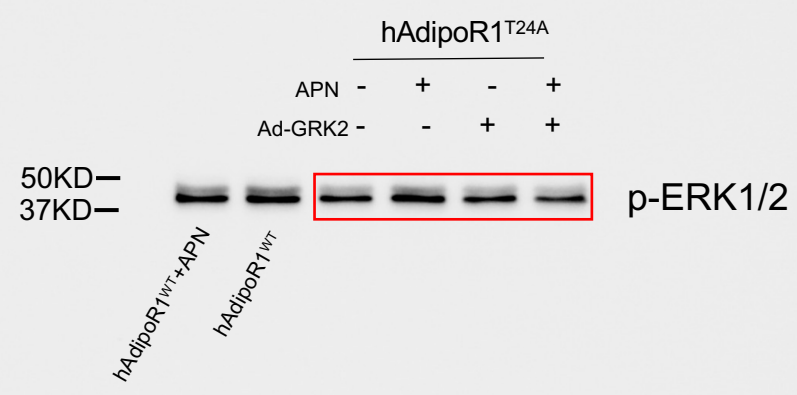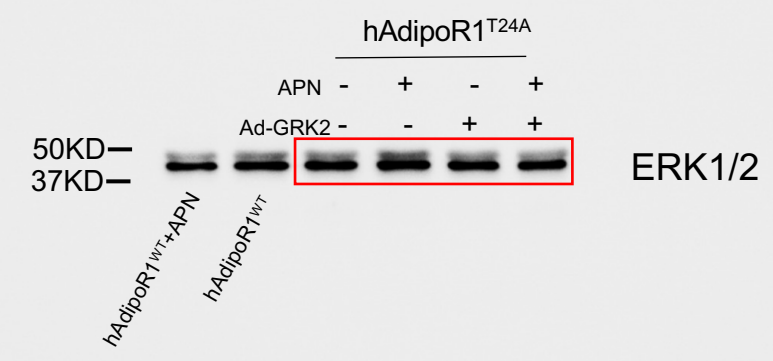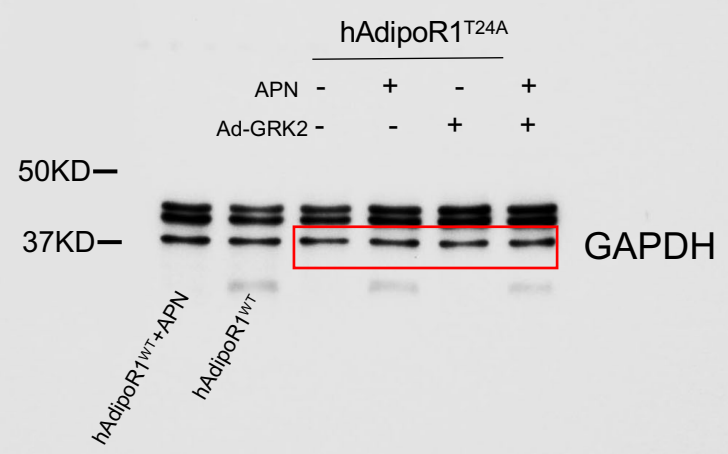

Figure S3C

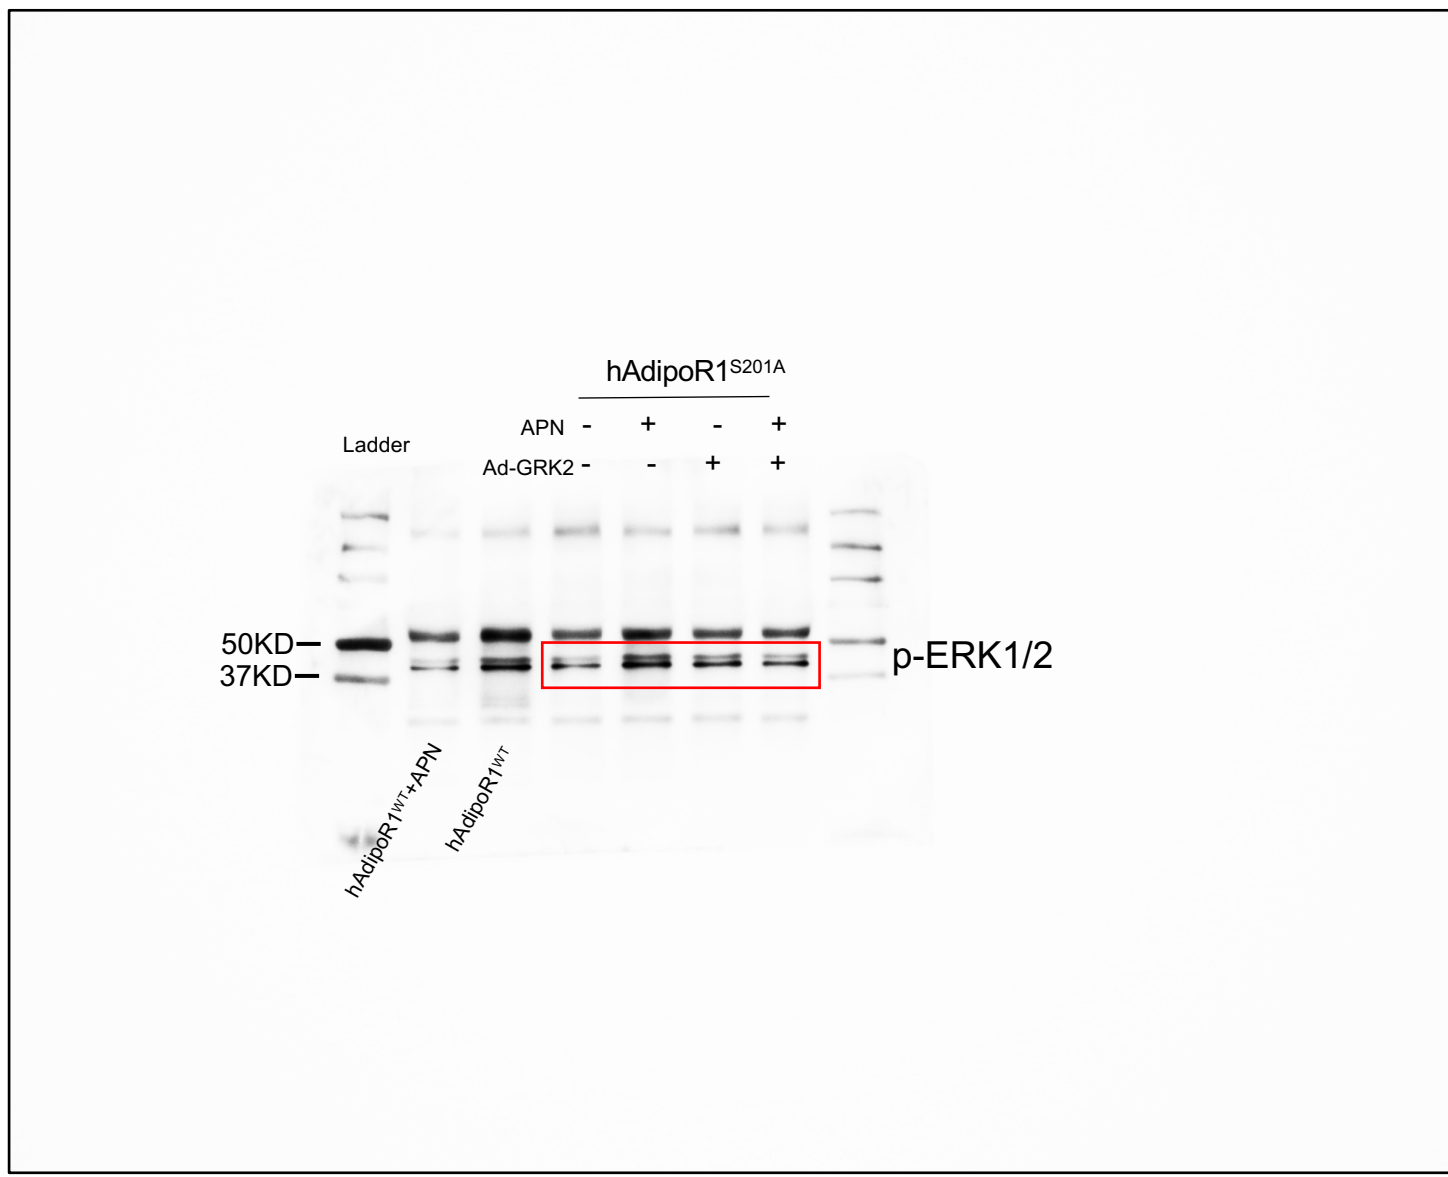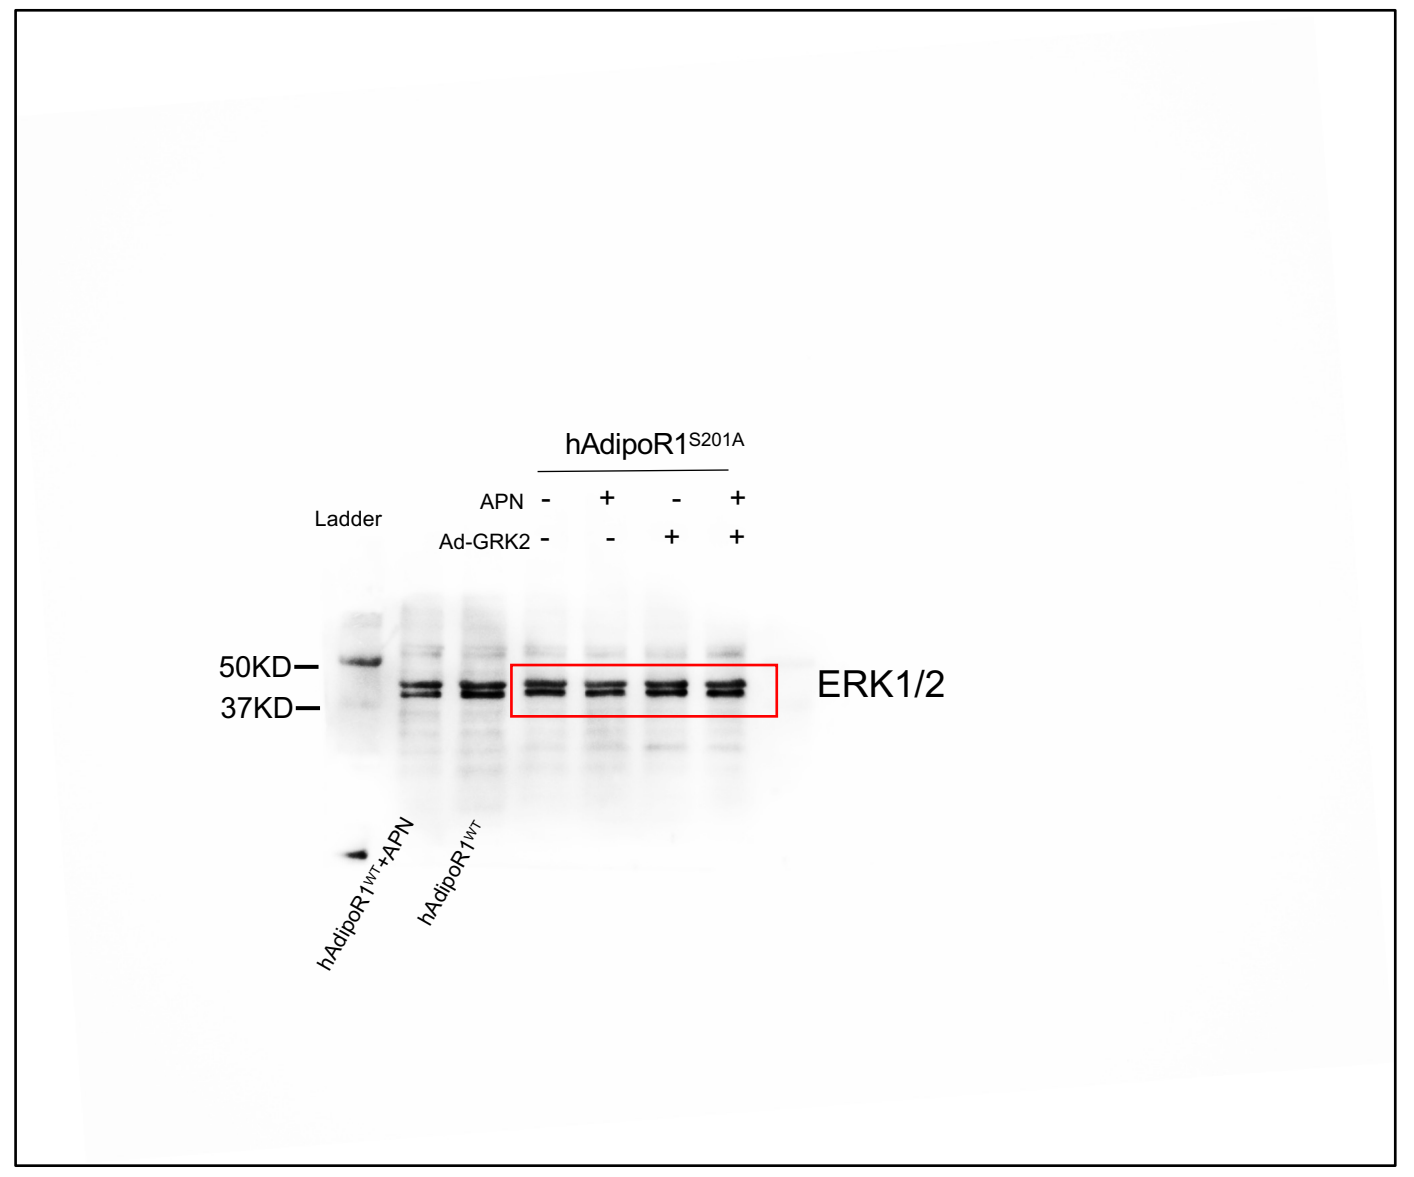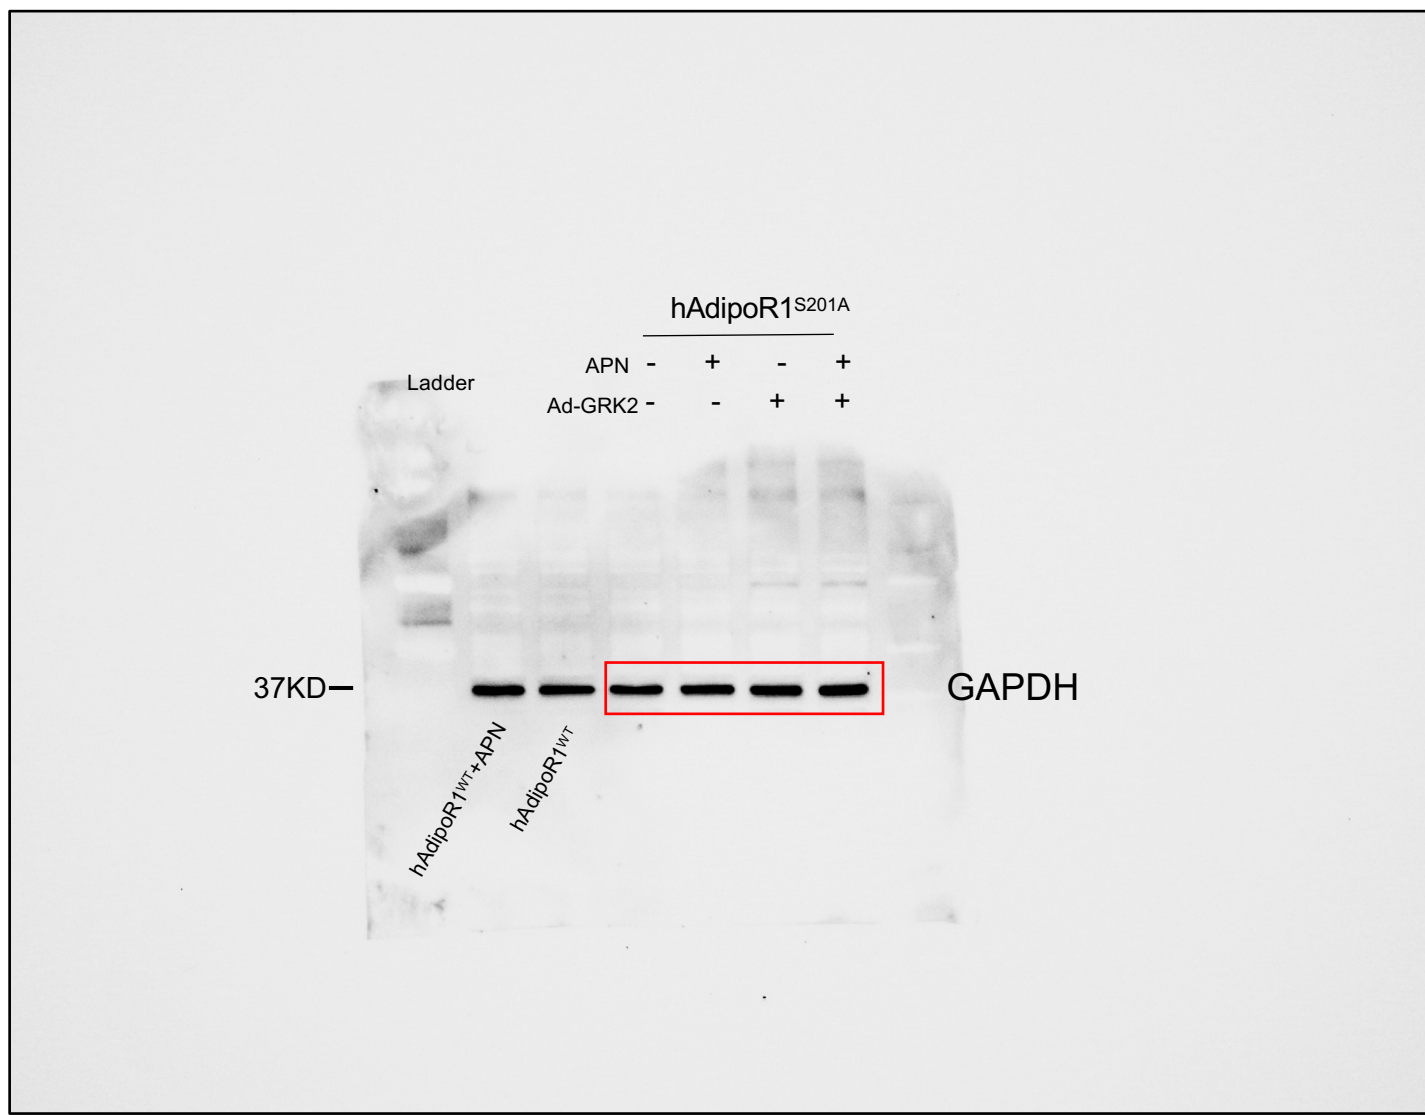

Figure S3E

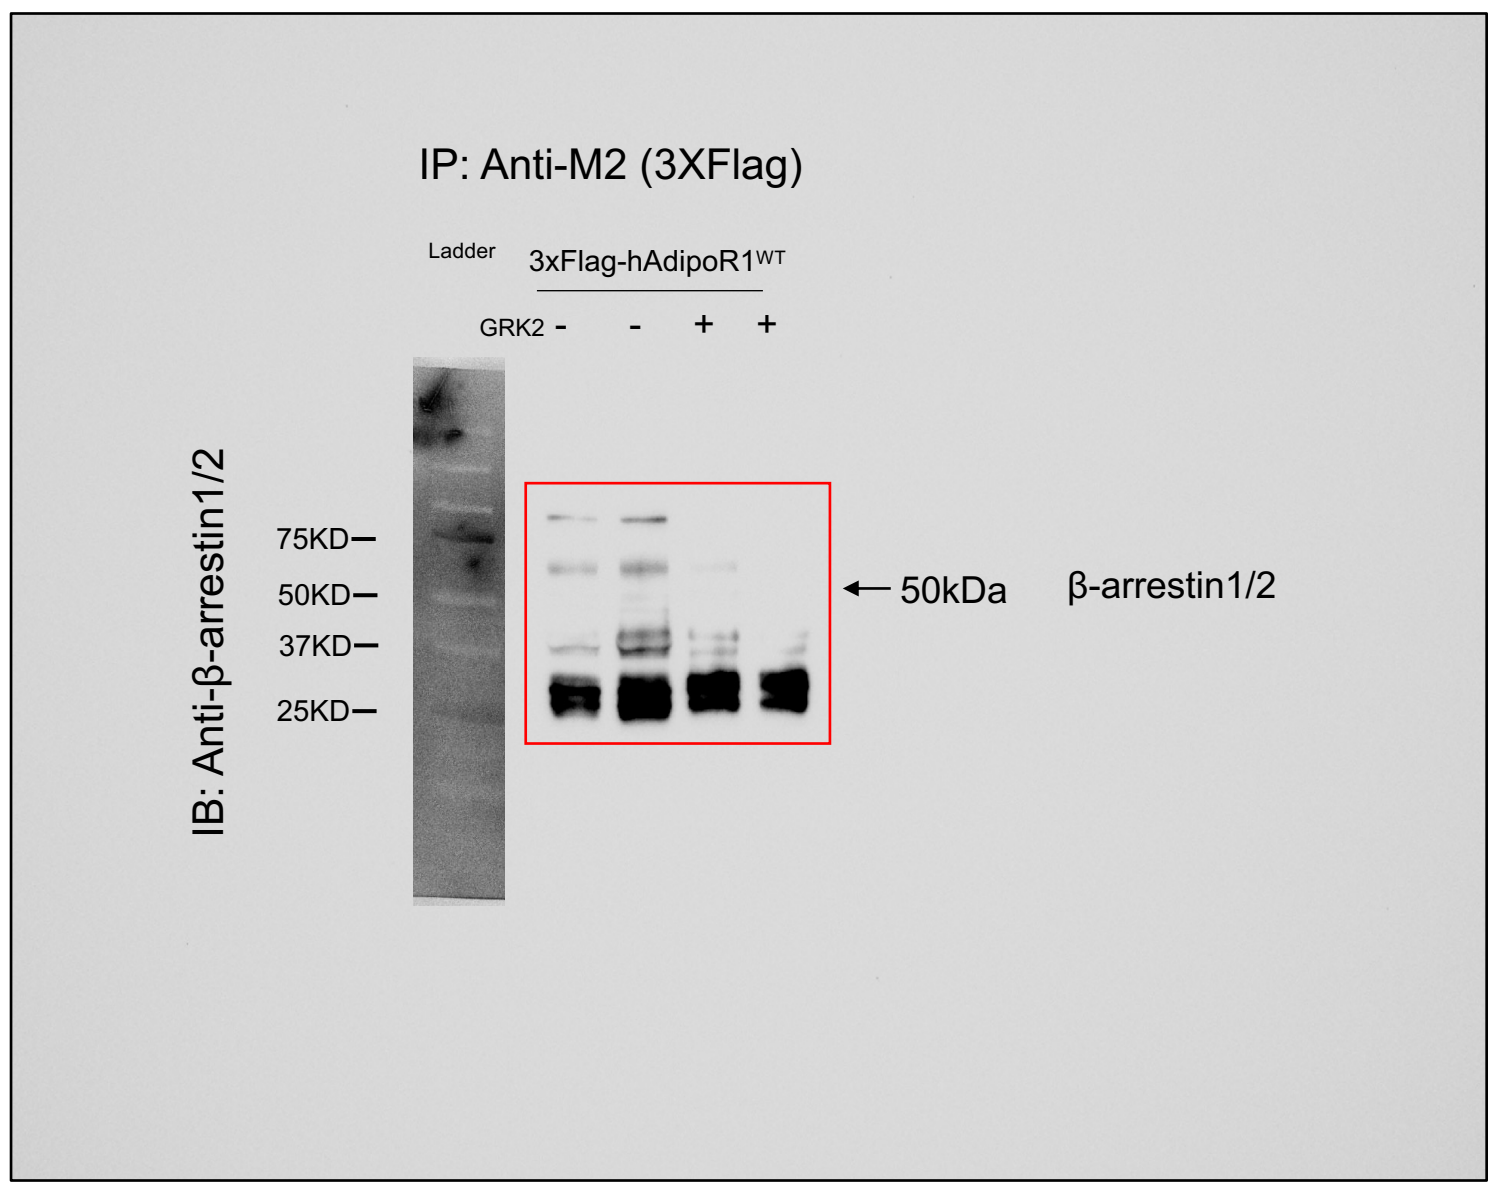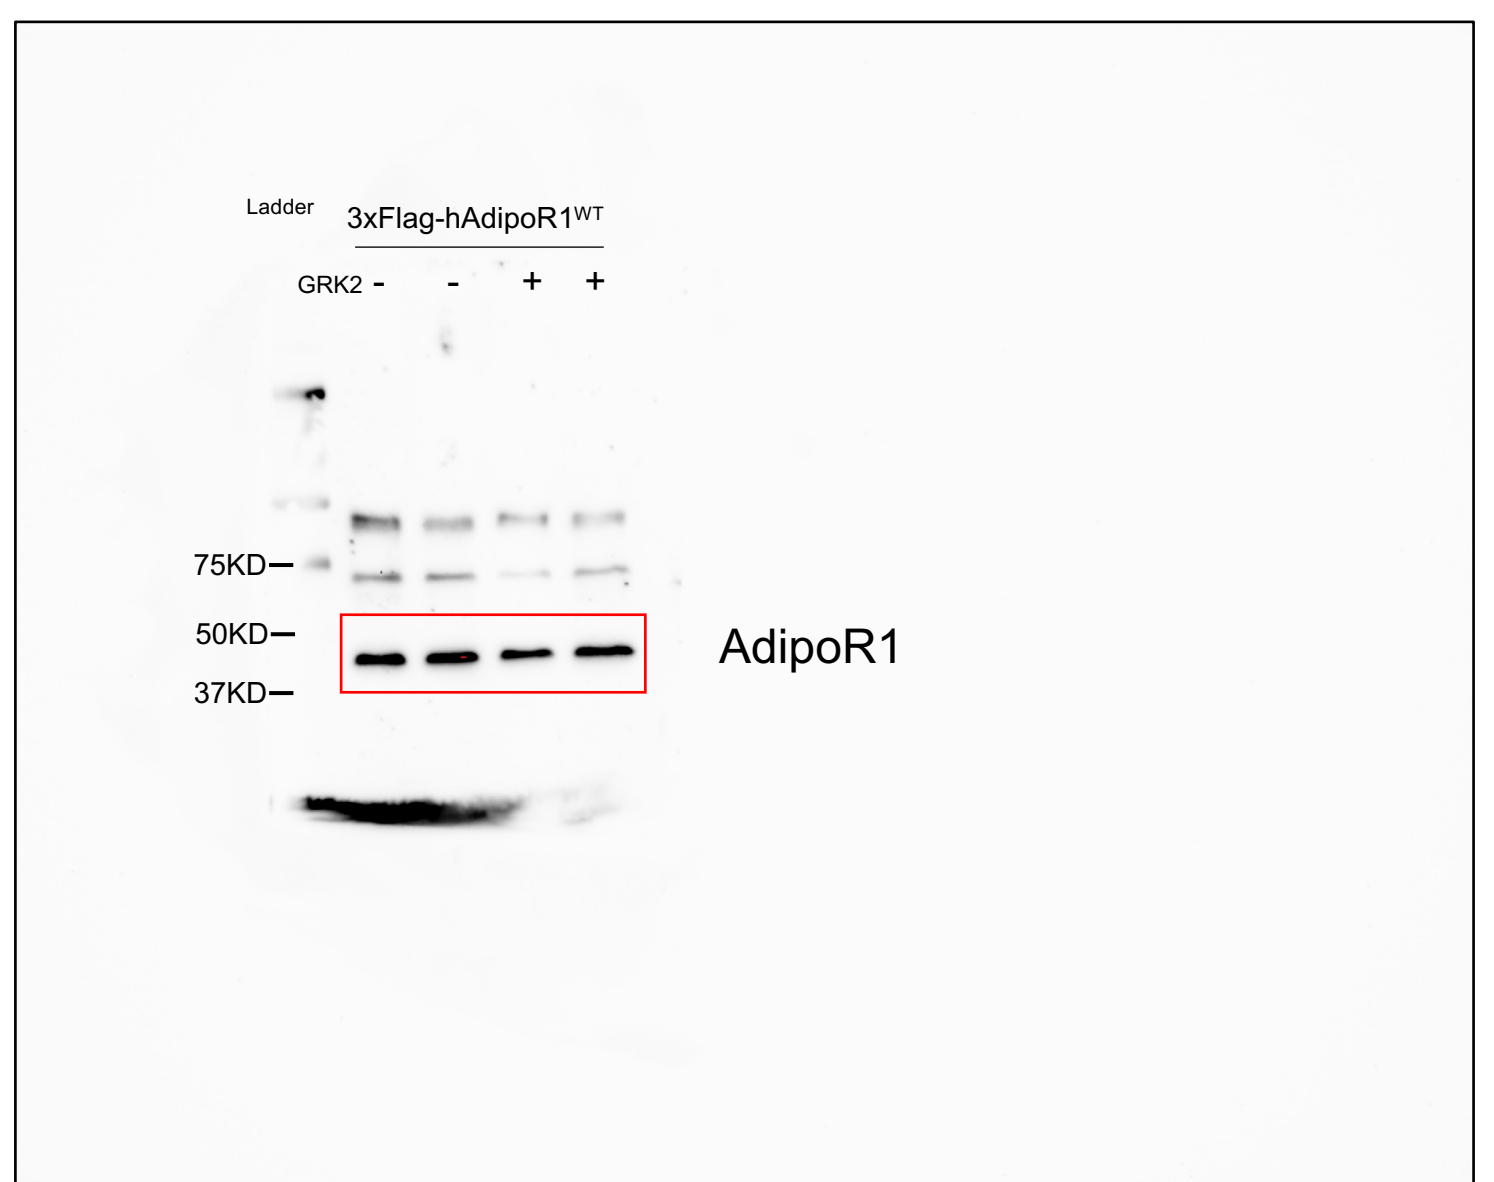

Figure S4

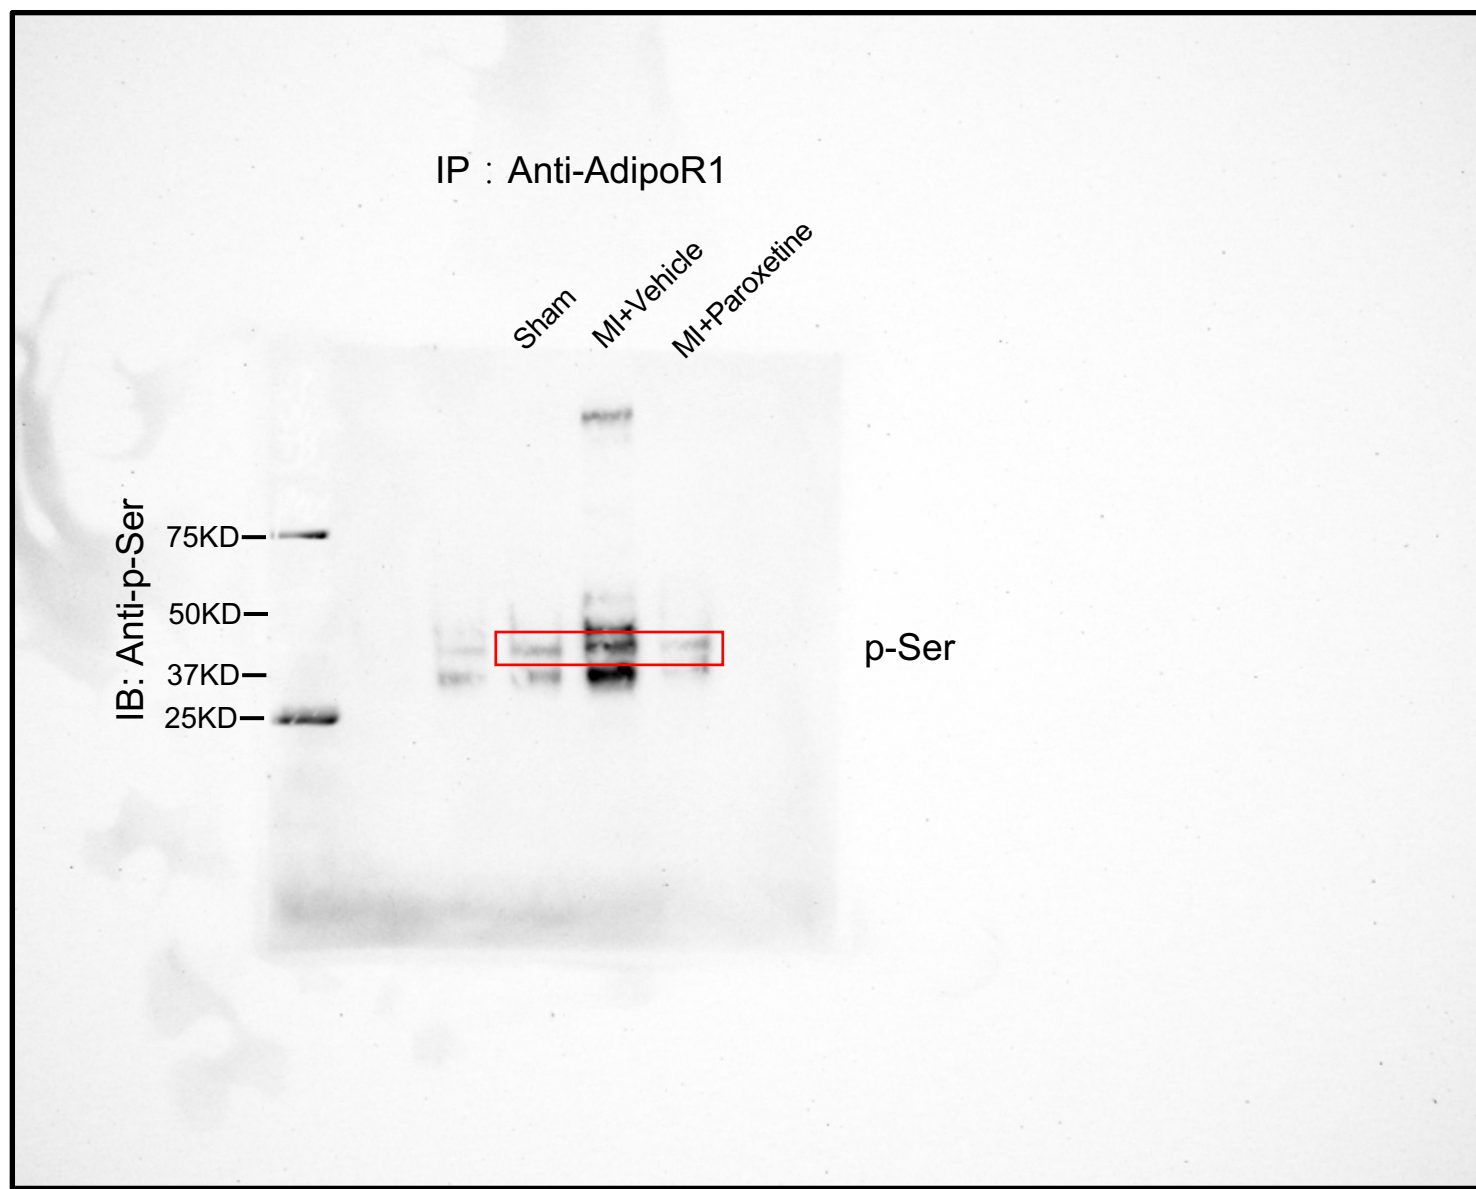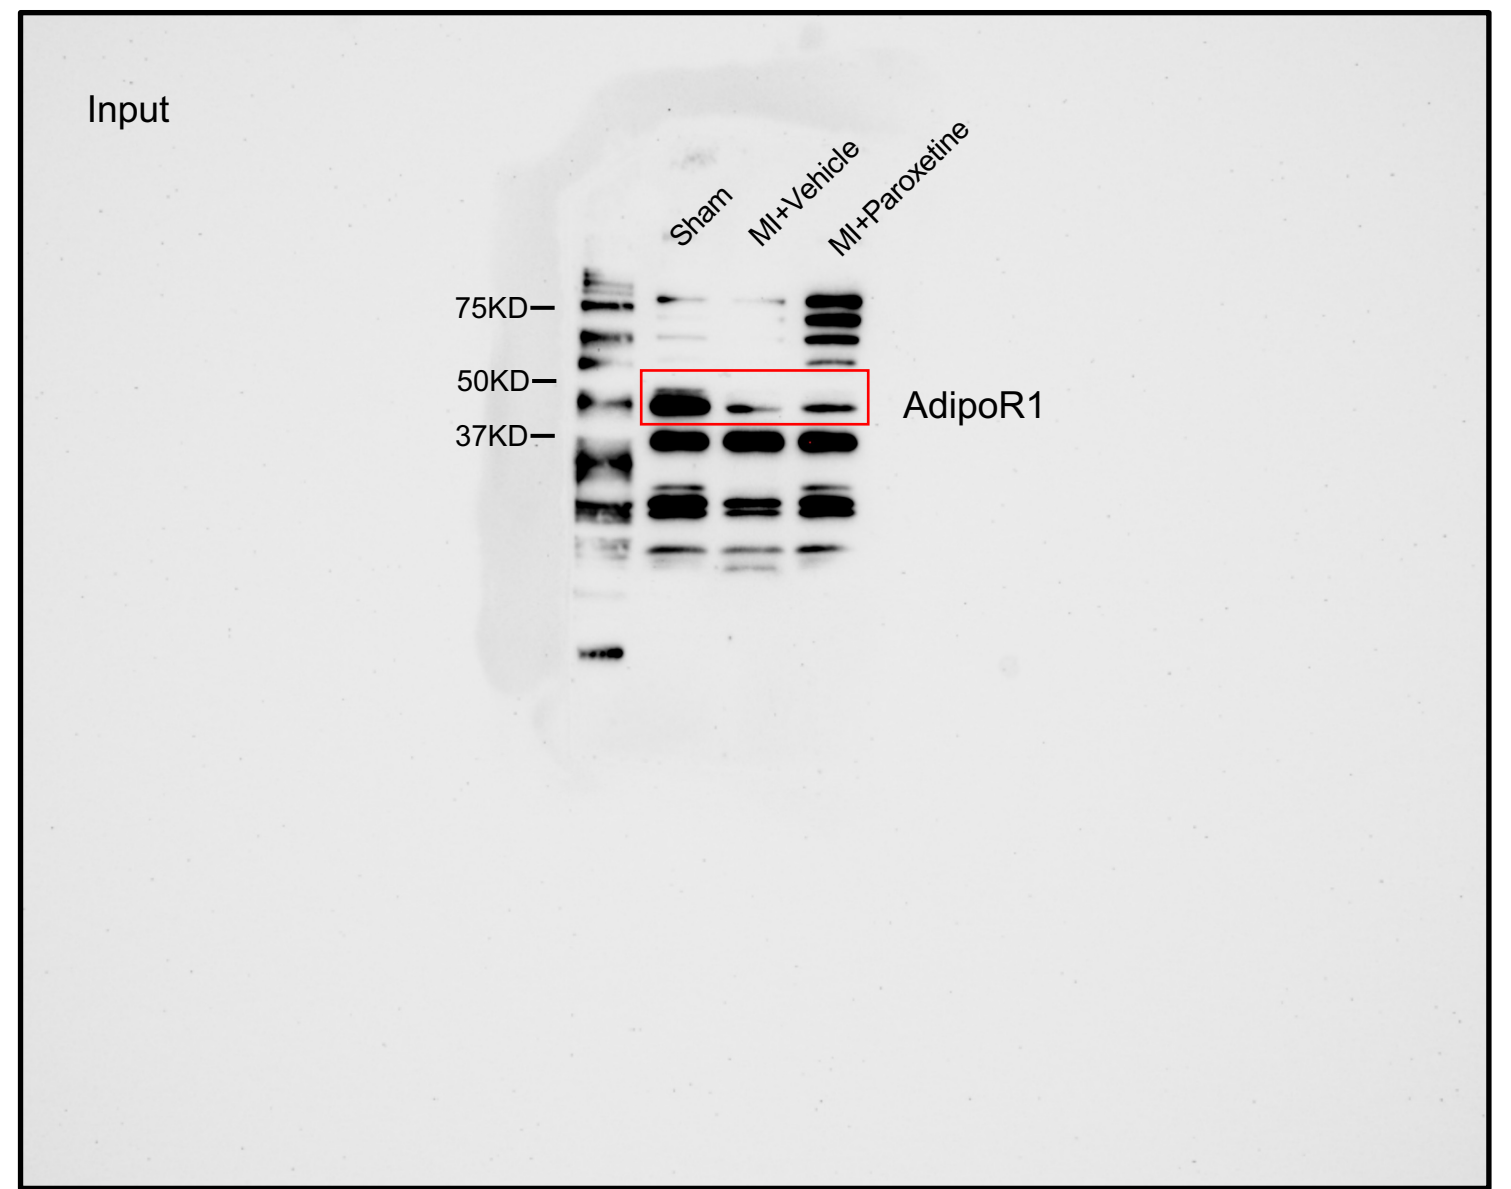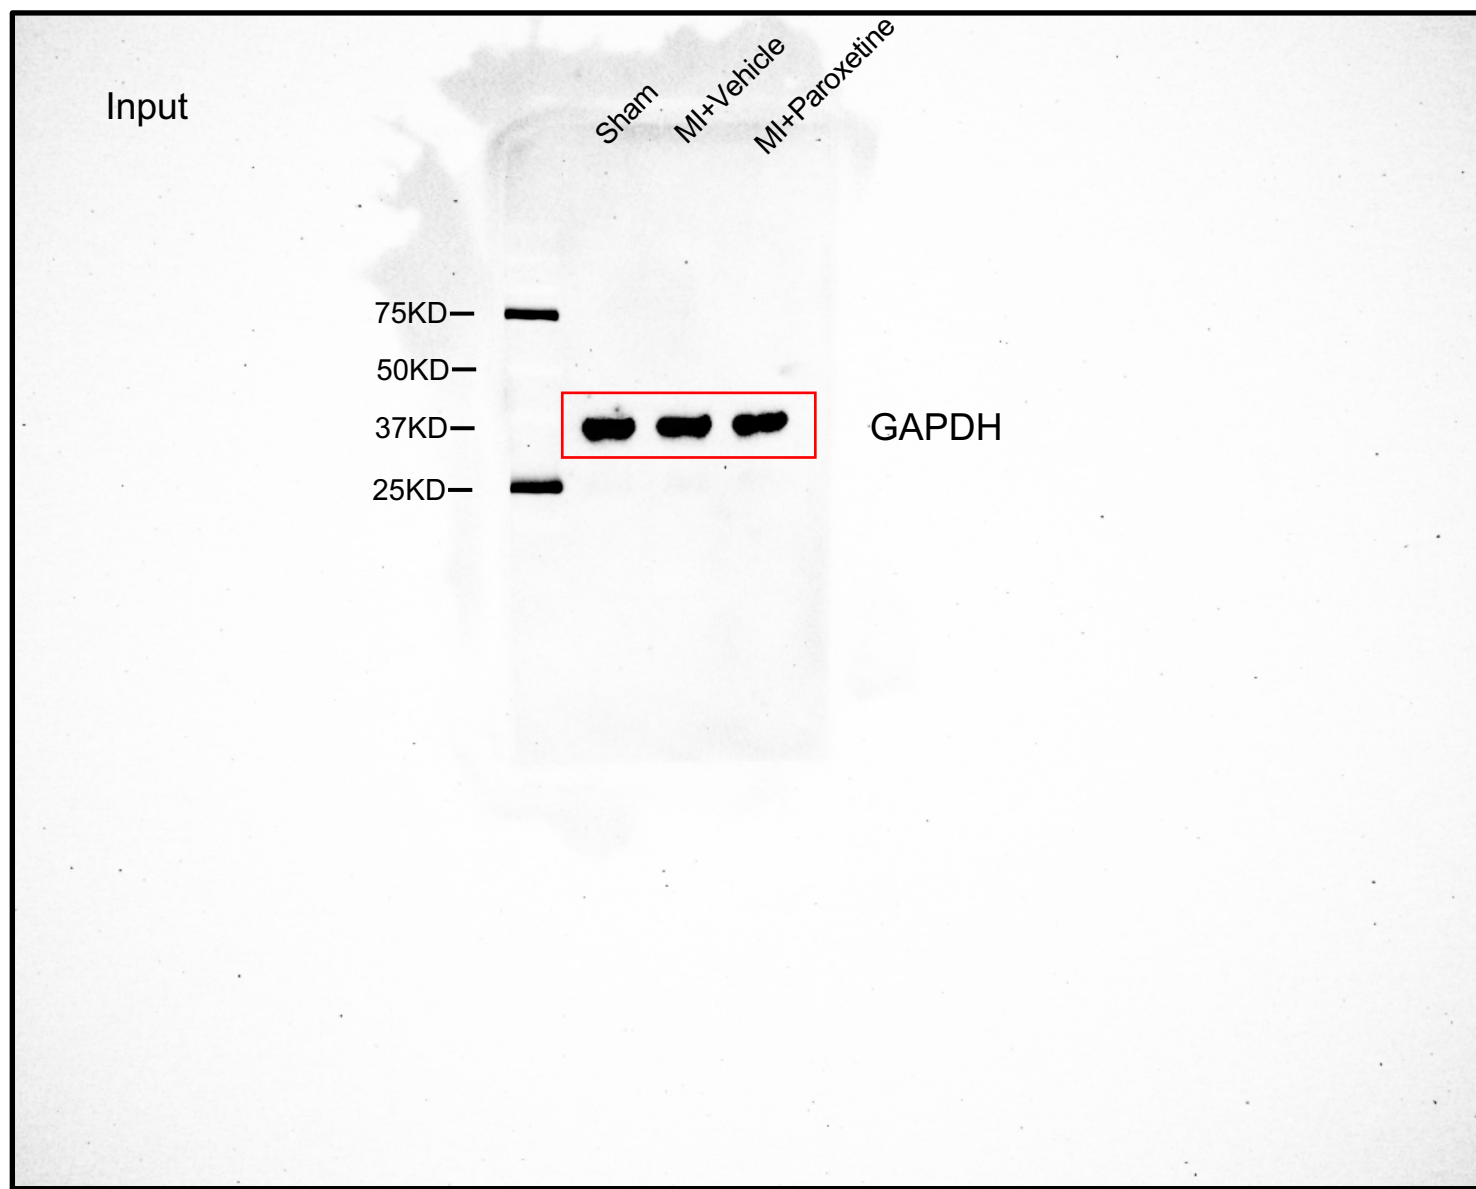

Figure S7
